# Supplementary material for: Nanoparticle delivery of miR-21-3p sensitizes melanoma to anti-PD-1 immunotherapy by promoting ferroptosis
Source: J Immunother Cancer. 2022 Jun 22;10(6):e004381. doi: 10.1136/jitc-2021-004381 (PMC9226924; doi:10.1136/jitc-2021-004381)
Supplement: Supplementary data [file jitc-2021-004381supp002.xlsx]

## Sheet: All
	RSL3+IFNγ-1	RSL3+IFNγ-2	RSL3+IFNγ-3	RSL3-1	RSL3-2	RSL3-3	log2FC	PValue	FC
hsa-let-7a-2-3p	16.8356	38.8484	27.5164	13.7477	7.57506	16.5542	0.640704	0.0939236	1.55909
hsa-let-7a-3p	91.6053	106.898	160.115	82.8386	38.5065	118.493	0.141589	0.727557	1.10312
hsa-let-7a-5p	10815.6	17875.5	19542.7	9783.06	6920.24	12213.7	0.274539	0.412923	1.20961
hsa-let-7b-3p	32.9284	32.5909	34.8831	22.5603	19.1481	31.8887	0.0379529	0.908083	1.02666
hsa-let-7b-5p	10718.8	12809.8	14833.7	5133.35	6815.24	7026.31	0.594007	0.0554435	1.50943
hsa-let-7c-3p	3.96131	8.08255	6.93328	8.1076	4.20837	9.06126	-0.651761	0.142208	0.636503
hsa-let-7c-5p	1824.18	2954.82	2489.7	1336.52	1598.55	1777.92	0.177264	0.55288	1.13074
hsa-let-7d-3p	92.5956	141.314	143.866	86.0111	98.0549	124.418	-0.151394	0.624462	0.90038
hsa-let-7d-5p	412.471	715.176	675.995	353.562	308.894	436.335	0.251953	0.419778	1.19082
hsa-let-7e-3p	12.3791	25.0298	24.9165	9.69387	11.7834	15.5087	0.290384	0.412714	1.22297
hsa-let-7e-5p	866.041	1482.24	1534.85	915.983	656.505	1070.27	0.0873473	0.78869	1.06241
hsa-let-7f-1-3p	7.17987	2.60728	4.11663	3.17254	2.3146	7.31871	-0.210212	0.792069	0.86441
hsa-let-7f-2-3p	2.97098	3.65019	13.6499	6.34508	4.20837	13.5919	-0.691127	0.247674	0.61937
hsa-let-7f-5p	3200.24	5174.92	5921.45	4748.59	2681.57	4758.56	-0.242749	0.486207	0.845133
hsa-let-7g-3p	21.292	18.5117	25.3498	7.57885	10.9418	8.5385	0.867837	0.0186985	1.82493
hsa-let-7g-5p	6232.87	7804.88	8406.6	9271.22	6272.36	10957	-0.678368	0.0419587	0.624872
hsa-let-7i-3p	8.1702	12.5149	16.6832	5.28757	5.47088	8.88701	0.479973	0.231002	1.39472
hsa-let-7i-5p	57532.6	47522.3	51314.9	61904.2	67589.9	76350.4	-0.781144	0.0197866	0.581905
hsa-miR-1-3p	186.429	389.527	265.631	169.907	146.451	1275.2	-1.34481	0.0302334	0.393706
hsa-miR-100-3p	4.20889	19.5546	13.8666	11.6326	8.20631	14.9859	-0.413963	0.353769	0.750559
hsa-miR-100-5p	39721.3	73474.1	46625.6	37758.3	35842.9	57267.4	-0.16846	0.608698	0.889792
hsa-miR-101-2-5p	1.23791	0	0	0	0	0	4.12975	0.335778	17.5057
hsa-miR-101-3p	3374.54	3804.27	6533.75	3463.71	4736.3	3516.82	-0.20702	0.544495	0.866325
hsa-miR-101-5p	0.247582	0.260728	0	0.528757	0	0.174255	-0.881417	0.801096	0.542834
hsa-miR-10392-5p	0.742745	0.521455	0.86666	1.76252	3.78753	1.5683	-2.08478	0.0094838	0.235731
hsa-miR-10394-3p	0	3.65019	0	0	0	0.174255	3.28555	0.16788	9.75102
hsa-miR-10394-5p	0	1.04291	0.86666	0.528757	0	0.34851	0.484308	0.873273	1.39891
hsa-miR-10395-3p	1.23791	1.56437	2.59998	0.352505	0.631255	0.69702	1.23141	0.148969	2.34796
hsa-miR-10399-3p	39.6131	78.2183	50.9163	35.603	45.2399	59.421	-0.190562	0.568307	0.876264
hsa-miR-10399-5p	5.94196	14.34	15.5999	16.5677	21.6731	15.1602	-1.04835	0.00494621	0.483522
hsa-miR-103a-2-5p	7.42745	9.38619	6.28328	8.1076	6.10213	3.83361	-0.0983143	0.865731	0.934124
hsa-miR-103a-3p	6785.23	7636.71	8198.6	10698.5	7774.11	11446.8	-0.833012	0.0107985	0.561356
hsa-miR-10400-5p	0.247582	3.65019	0	0	0.210418	0.174255	2.57684	0.158048	5.9663
hsa-miR-10401-3p	142.607	376.751	327.597	74.3785	142.453	84.5137	1.00539	0.00570549	2.00749
hsa-miR-10401-5p	1.23791	2.34655	0.86666	0.352505	0	0.34851	2.03729	0.0729642	4.10475
hsa-miR-105-3p	51.497	62.5746	58.7162	22.9128	37.8753	33.9797	0.452682	0.167584	1.36858
hsa-miR-105-5p	257.98	407.517	371.58	244.462	200.108	328.297	-0.0277368	0.931342	0.980958
hsa-miR-10523-5p	2.47582	4.6931	6.06662	3.34879	6.31255	4.35638	-0.516658	0.252492	0.698989
hsa-miR-10524-5p	0	0	0	0.352505	0	0	-2.733	0.693107	0.150413
hsa-miR-10526-3p	3.46615	15.1222	11.4832	3.52505	6.10213	2.43957	0.8076	0.122041	1.7503
hsa-miR-10527-5p	18.8162	11.7327	7.36661	12.8664	18.5168	13.9404	-0.603497	0.189932	0.658157
hsa-miR-106a-5p	27.234	27.1157	33.7997	45.6493	26.9335	37.9876	-0.761072	0.0386435	0.590058
hsa-miR-106b-3p	2064.09	3386.07	3526.44	1415.48	2146.48	1974.83	0.249461	0.422461	1.18876
hsa-miR-106b-5p	1026.47	1494.49	1285.47	1111.62	1140.89	1205.5	-0.306732	0.301724	0.808471
hsa-miR-107	396.378	498.511	563.546	431.818	238.404	568.943	-0.204191	0.573716	0.868025
hsa-miR-10a-3p	46.0502	69.3535	74.3161	85.3061	44.6087	107.69	-0.782295	0.0337857	0.581441
hsa-miR-10a-5p	7240.03	7763.16	6786.6	12086.9	11419.4	11887.3	-1.11619	0.000495468	0.46131
hsa-miR-10b-3p	9.90327	12.7756	21.2332	10.3989	9.04799	20.2136	-0.286517	0.493236	0.819879
hsa-miR-10b-5p	4428.99	3526.86	3230.04	5691.36	5337.47	5070.47	-0.911067	0.00897234	0.531792
hsa-miR-11401	0.495164	1.30364	0	0.352505	0.210418	1.39404	-0.596053	0.704144	0.661562
hsa-miR-1179	1.23791	0.260728	0	0	0	0	4.30056	0.179348	19.706
hsa-miR-1180-3p	1246.82	2427.89	1455.34	460.547	628.309	637.425	1.1125	0.000444226	2.1622
hsa-miR-1180-5p	0	0	0.216665	0.528757	0.631255	0	-2.39441	0.354611	0.190199
hsa-miR-1185-1-3p	0	0.521455	1.29999	1.05751	0	0.871275	-0.598027	0.723483	0.660657
hsa-miR-1185-2-3p	0	0	0.216665	0	0	0.34851	-0.828062	1	0.563286
hsa-miR-1197	0	0	0	0.528757	0	0.871275	-4.45725	0.0998458	0.0455234
hsa-miR-1207-5p	0	0	0	0	0.420837	0	-2.77822	0.697506	0.145772
hsa-miR-12114	0.495164	0	0.43333	0.352505	0.210418	0.34851	-0.30551	1	0.809156
hsa-miR-12135	7.42745	32.0695	33.3664	6.52133	6.9438	20.5621	0.600168	0.247776	1.51589
hsa-miR-122-3p	0.495164	0.782183	0	0	0.210418	0	1.94	0.458364	3.83706
hsa-miR-122-5p	81.702	265.421	91.6493	27.8479	85.009	28.9263	1.13492	0.017263	2.19606
hsa-miR-1226-3p	7.42745	17.4687	9.53326	5.28757	4.6292	2.78808	0.938902	0.0354337	1.91707
hsa-miR-1226-5p	12.1315	8.86474	8.0166	8.81261	9.46882	6.27318	-0.150338	0.747448	0.90104
hsa-miR-1227-3p	0	0.782183	0.43333	0	0	0.522765	0.60376	1	1.51967
hsa-miR-1228-3p	0.247582	0	0.86666	0	0.631255	0	0.477009	0.861108	1.39186
hsa-miR-1229-3p	2.7234	11.9935	7.36661	3.52505	1.26251	2.78808	0.9855	0.074863	1.98
hsa-miR-1229-5p	0.742745	0.521455	0	0.528757	0	0	0.716393	0.858698	1.64307
hsa-miR-1234-3p	1.48549	2.60728	0	1.93877	1.89376	0.174255	-0.447757	0.728003	0.733182
hsa-miR-1236-3p	0.742745	2.60728	1.51665	0.352505	0.210418	0	2.46256	0.0300907	5.51195
hsa-miR-1236-5p	0.247582	0	0	0	0.210418	0	0.0660011	1	1.04681
hsa-miR-1237-3p	1.23791	0	0.43333	0.176252	0	0.174255	1.76352	0.373526	3.39526
hsa-miR-124-3p	0.495164	2.08582	5.19996	0.176252	2.10418	16.38	-1.68019	0.101586	0.312042
hsa-miR-1243	0	1.56437	0	1.05751	0	0.174255	-0.378451	0.901811	0.769263
hsa-miR-1246	644.455	1749.74	1778.39	144.351	171.491	297.453	2.28418	4.91495e-09	4.87086
hsa-miR-1248	3.46615	0.521455	3.89997	1.23377	0.420837	1.91681	0.775958	0.402157	1.71233
hsa-miR-1249-3p	32.6808	56.3171	38.133	20.6215	23.5668	22.1304	0.481817	0.125045	1.3965
hsa-miR-1249-5p	3.46615	0.782183	6.28328	5.64007	7.15422	2.78808	-0.939586	0.150793	0.521383
hsa-miR-1250-5p	7.67504	9.90765	7.36661	3.52505	4.83962	4.35638	0.541308	0.180431	1.45529
hsa-miR-1252-5p	0.495164	0.260728	0.216665	0.352505	0	0.174255	0.383297	1	1.30432
hsa-miR-1255a	18.0735	16.9473	14.0832	17.8015	14.7293	18.471	-0.465474	0.204197	0.724233
hsa-miR-1255b-5p	3.96131	7.30037	2.59998	0.528757	0.841673	1.91681	1.59987	0.0154544	3.03116
hsa-miR-1256	1.23791	0.521455	1.29999	0.528757	0.631255	0.174255	0.796154	0.483898	1.73647
hsa-miR-1257	11.3888	19.0331	9.74992	7.93135	8.83757	8.18999	0.231336	0.541826	1.17392
hsa-miR-125a-3p	32.1856	82.3899	66.2995	22.5603	27.5648	26.1383	0.756769	0.0278247	1.6897
hsa-miR-125a-5p	1366.9	1179.53	1121.46	1101.22	865.03	1114.01	-0.144508	0.667709	0.904688
hsa-miR-125b-1-3p	293.88	633.307	471.896	261.03	241.56	300.939	0.318738	0.311912	1.24724
hsa-miR-125b-2-3p	120.325	193.981	172.899	130.25	148.766	169.376	-0.329637	0.274533	0.795737
hsa-miR-125b-5p	4886.27	6153.69	5367.66	3557.12	3370.48	4213.14	0.129477	0.673149	1.0939
hsa-miR-126-3p	326.56	566.822	773.494	661.122	504.373	520.848	-0.500709	0.14759	0.70676
hsa-miR-126-5p	4.20889	3.12873	16.0332	9.51762	10.5209	9.40977	-0.763435	0.14814	0.589092
hsa-miR-1260a	646.436	3022.09	1649.04	428.469	596.325	448.01	1.31593	0.000995225	2.48963
hsa-miR-1260b	839.797	3835.04	2171.2	519.592	740.462	551.866	1.38413	0.000480629	2.61015
hsa-miR-1261	0.495164	0.782183	0.43333	0	0	0	4.27863	0.0719055	19.4087
hsa-miR-1262	16.3404	26.8549	21.6665	21.1503	19.7793	20.9106	-0.390325	0.220364	0.762958
hsa-miR-1265	0	0	0	0	0	0.34851	-2.59073	0.69346	0.166002
hsa-miR-1266-5p	19.559	22.944	9.74992	9.87013	14.7293	9.06126	0.224913	0.599334	1.16871
hsa-miR-1268a	49.5164	319.913	313.514	41.948	91.1111	57.3299	1.31427	0.00772095	2.48676
hsa-miR-1268b	52.9825	337.903	330.847	44.2393	97.6341	61.1635	1.30207	0.00819661	2.46583
hsa-miR-1269a	0.495164	1.04291	0.43333	0.881261	0.841673	0.174255	-0.415264	0.777976	0.749882
hsa-miR-1269b	0.990327	0	0	0.528757	0	0.174255	0.205447	1	1.15304
hsa-miR-127-3p	5.4468	8.08255	14.5166	6.52133	9.46882	5.57616	-0.0648686	0.883569	0.956032
hsa-miR-127-5p	0.495164	1.04291	1.08332	0.176252	0.420837	0.69702	0.550592	0.74485	1.46469
hsa-miR-1271-3p	0.247582	1.82509	0.86666	0	0.210418	0.522765	1.40993	0.350263	2.65723
hsa-miR-1271-5p	10.3984	19.2938	29.8998	8.81261	7.36464	10.9781	0.661496	0.100431	1.58172
hsa-miR-1272	15.3501	3.38946	2.16665	7.57885	8.62715	2.43957	-0.0948384	0.921829	0.936377
hsa-miR-1273c	5.69438	4.95382	8.88326	4.40631	5.26046	4.87914	0.0136856	1	1.00953
hsa-miR-1273h-3p	0.742745	0.521455	0	0	0.210418	0	2.00963	0.465025	4.02679
hsa-miR-1273h-5p	0	0.260728	0.649995	0	0	0.34851	0.785978	1	1.72426
hsa-miR-1275	7.42745	34.416	26.6498	4.40631	7.78548	6.79595	1.33814	0.0030775	2.52826
hsa-miR-1276	4.20889	5.21455	6.49995	5.28757	2.94586	6.62169	-0.346132	0.454023	0.78669
hsa-miR-1277-3p	0.247582	0	1.08332	0.176252	0	0	2.06627	0.388007	4.18801
hsa-miR-1277-5p	0	0	0.43333	3.17254	1.68335	3.83361	-4.41788	7.75383e-06	0.0467827
hsa-miR-1278	6.93229	9.12546	17.3332	17.0965	8.83757	25.4412	-1.06849	0.0191359	0.476816
hsa-miR-128-1-5p	35.1566	47.7131	41.383	23.9703	32.4044	24.2215	0.190116	0.547132	1.14086
hsa-miR-128-3p	827.418	1545.59	1709.49	734.972	765.081	1328.52	0.071008	0.834617	1.05045
hsa-miR-1283	141.617	119.413	137.149	116.326	124.147	117.448	-0.242167	0.461744	0.845475
hsa-miR-1285-3p	105.47	163.215	156.865	50.7607	76.5923	62.5576	0.720916	0.0202293	1.64823
hsa-miR-1285-5p	30.4526	50.3204	39.433	17.0965	22.3043	15.5087	0.676498	0.0358386	1.59826
hsa-miR-1286	1.98065	2.60728	2.81664	1.76252	2.52502	3.65936	-0.523804	0.374772	0.695535
hsa-miR-1287-3p	0.742745	4.17164	1.51665	4.23005	1.47293	4.70489	-1.23192	0.0626204	0.425751
hsa-miR-1287-5p	371.868	532.927	553.146	266.67	333.092	329.168	0.209572	0.487537	1.15634
hsa-miR-1288-3p	0.742745	7.30037	1.08332	1.93877	3.57711	2.61383	-0.389634	0.60248	0.763323
hsa-miR-1288-5p	0	0	0	0	0	0.871275	-3.74388	0.358323	0.0746414
hsa-miR-1289	0	0.521455	0	0	0	0	2.57125	0.685094	5.94322
hsa-miR-129-1-3p	0	0	0.86666	0	0	0.174255	1.5327	0.800306	2.89327
hsa-miR-129-2-3p	0.247582	1.56437	0	1.05751	0	0.522765	-0.423348	0.905163	0.745692
hsa-miR-129-5p	14.8549	11.7327	14.5166	11.8089	17.0439	9.23552	-0.283683	0.477464	0.821491
hsa-miR-1290	58.1817	316.262	356.197	17.6252	23.5668	57.6784	2.37822	1.14554e-05	5.19896
hsa-miR-1291	3.71373	7.03964	4.3333	1.76252	1.47293	2.78808	0.845366	0.0970328	1.79672
hsa-miR-1292-3p	0	2.34655	3.89997	0.352505	2.73544	1.5683	-0.0530131	0.95029	0.963921
hsa-miR-1292-5p	61.8955	57.3601	33.1497	34.0167	50.0795	32.76	0.000531647	1	1.00037
hsa-miR-1293	3.71373	8.86474	5.84995	3.7013	4.20837	3.31085	0.237887	0.649664	1.17926
hsa-miR-1294	0.247582	3.38946	4.11663	0.705009	0.631255	3.13659	0.279208	0.801653	1.21353
hsa-miR-1295b-3p	0	1.04291	0	0	0	0.174255	1.60225	0.665991	3.03617
hsa-miR-1296-3p	0	0.521455	0.43333	0	0	0	3.41955	0.291715	10.7001
hsa-miR-1296-5p	49.0212	67.2677	115.049	47.2356	42.2941	90.4384	-0.0776927	0.84224	0.947572
hsa-miR-1298-5p	0.247582	0	0.43333	0.705009	1.47293	0.174255	-1.99986	0.183384	0.250024
hsa-miR-1299	9.16053	20.5975	11.0499	2.64378	3.15627	4.00787	1.57554	0.000155179	2.98047
hsa-miR-1301-3p	515.96	574.122	607.095	353.386	326.569	363.67	0.276313	0.373074	1.2111
hsa-miR-1303	345.377	303.487	326.297	239.879	221.781	304.249	-0.0454924	0.89138	0.968959
hsa-miR-1304-3p	77.9883	161.912	171.815	89.1836	117.203	122.327	-0.145105	0.654163	0.904314
hsa-miR-1304-5p	19.8065	43.5415	15.3832	17.449	15.7814	18.8195	0.114756	0.778163	1.08279
hsa-miR-1305	24.5106	34.1553	30.5498	23.4416	31.3523	23.0017	-0.240257	0.451462	0.846594
hsa-miR-1306-3p	17.5783	53.1884	36.6164	12.3377	16.4126	14.6374	0.809593	0.0245115	1.75272
hsa-miR-1306-5p	23.7679	21.6404	31.8497	19.564	20.8314	17.774	-0.0067911	1	0.995304
hsa-miR-1307-3p	6712.44	12142.3	10931.2	4662.93	5998.39	5033.71	0.461013	0.134173	1.37651
hsa-miR-1307-5p	229.756	432.808	321.097	98.525	164.758	162.231	0.758254	0.0176233	1.69144
hsa-miR-130a-3p	120.572	152.004	158.382	72.9684	86.2715	83.2939	0.398368	0.189302	1.31802
hsa-miR-130a-5p	45.5551	40.152	16.4665	22.384	34.9294	26.4868	-0.0795235	0.859506	0.94637
hsa-miR-130b-3p	297.841	344.942	331.497	156.865	176.331	176.869	0.512504	0.0911239	1.42652
hsa-miR-130b-5p	102.004	154.872	180.915	92.0037	76.3818	116.054	0.167687	0.605482	1.12326
hsa-miR-132-3p	110.421	178.077	133.032	101.345	100.159	121.107	-0.0656928	0.831471	0.955486
hsa-miR-132-5p	176.278	264.378	289.898	129.898	143.295	142.715	0.361566	0.234638	1.28482
hsa-miR-1322	0	0	0	0.176252	0.210418	0.174255	-3.20817	0.346172	0.108204
hsa-miR-1323	32.6808	23.4655	38.9997	39.128	31.3523	40.2529	-0.618561	0.0960803	0.65132
hsa-miR-133a-3p	15.3501	24.7691	18.4165	19.0352	13.6772	45.1321	-0.847328	0.0452072	0.555813
hsa-miR-133a-5p	0.247582	2.34655	0.216665	4.0538	1.68335	2.09106	-2.04304	0.0160945	0.242652
hsa-miR-133b	2.7234	1.30364	3.24997	0.881261	0.210418	3.4851	0.295294	0.760738	1.22713
hsa-miR-134-3p	0	0	0.43333	0	0	0	2.51144	0.691498	5.70191
hsa-miR-134-5p	9.65569	23.9869	14.0832	7.05009	8.20631	9.40977	0.469684	0.211512	1.38481
hsa-miR-1343-3p	7.67504	19.0331	12.1332	2.46753	2.94586	6.62169	1.21031	0.00698994	2.31388
hsa-miR-1343-5p	5.4468	10.6898	8.6666	3.34879	4.41878	1.5683	0.942464	0.047235	1.92181
hsa-miR-135a-2-3p	0.495164	0	0	0	0	0	2.89532	0.7076	7.44009
hsa-miR-135a-5p	0.247582	0	2.81664	0.176252	0.420837	0	1.83966	0.303971	3.57926
hsa-miR-135b-3p	34.909	44.8451	42.4663	43.0056	42.0837	40.0787	-0.473908	0.136804	0.720012
hsa-miR-135b-5p	180.982	209.364	206.265	268.608	164.126	282.99	-0.696251	0.0400353	0.617174
hsa-miR-136-3p	2.7234	0.521455	0.43333	0.352505	1.89376	0.174255	0.374889	0.804007	1.29674
hsa-miR-136-5p	0	0	0.216665	0.528757	0	0.871275	-2.65968	0.228754	0.158254
hsa-miR-137-3p	2.97098	3.12873	9.96659	3.7013	3.57711	1.91681	0.355197	0.571533	1.27916
hsa-miR-137-5p	0.247582	0	0	0	0	1.5683	-2.53862	0.341613	0.172108
hsa-miR-138-1-3p	0	0.260728	0	0.705009	0	0.34851	-2.29058	0.360471	0.204393
hsa-miR-138-5p	24.7582	15.3829	15.1665	11.8089	13.4668	8.36424	0.348922	0.410959	1.27361
hsa-miR-139-3p	4.20889	2.34655	0.216665	0.881261	1.68335	0.522765	0.808536	0.435946	1.75143
hsa-miR-139-5p	27.234	23.4655	25.5665	15.6865	14.7293	18.6453	0.235403	0.498202	1.17724
hsa-miR-140-3p	8329.39	10414.5	11917.7	8165.24	11417.5	9029.37	-0.330175	0.289966	0.79544
hsa-miR-140-5p	227.528	290.972	322.397	438.339	272.702	433.721	-0.893701	0.00770901	0.538232
hsa-miR-141-3p	1.73307	0.260728	0.86666	2.11503	0.420837	1.39404	-0.807417	0.485547	0.571404
hsa-miR-141-5p	0	0.521455	0	0	0	0.174255	0.741777	1	1.67223
hsa-miR-142-3p	5.94196	5.73601	6.93328	1.76252	1.47293	4.18212	0.903483	0.0757794	1.87058
hsa-miR-142-5p	1.73307	6.77892	4.98329	4.58256	5.68129	2.61383	-0.432436	0.4044	0.74101
hsa-miR-143-3p	228.766	555.089	551.196	913.515	857.454	212.417	-1.09559	0.024138	0.467944
hsa-miR-143-5p	0.247582	1.82509	0.86666	2.99629	1.47293	0.871275	-1.39578	0.112505	0.380039
hsa-miR-144-3p	1.98065	7.30037	1.51665	0.176252	0.420837	1.04553	2.15881	0.0140179	4.46547
hsa-miR-144-5p	0.495164	0	0.216665	0.528757	0	0.522765	-0.845766	0.698733	0.556415
hsa-miR-145-3p	2.47582	2.60728	3.6833	5.11132	2.10418	0.522765	-0.302375	0.72762	0.810916
hsa-miR-145-5p	16.8356	15.6437	8.23327	19.9165	17.4647	11.8493	-0.68415	0.113905	0.622373
hsa-miR-1468-5p	0.247582	0.521455	0	0.528757	1.26251	1.04553	-2.23387	0.0793405	0.212588
hsa-miR-146a-3p	43.5744	71.9608	62.1828	59.0445	45.6608	40.9499	-0.187176	0.577015	0.878324
hsa-miR-146a-5p	151423	143535	137487	88416.9	108948	85337.8	0.213012	0.516942	1.15911
hsa-miR-146b-3p	3.46615	7.03964	4.76663	5.11132	2.3146	2.43957	0.124623	0.843361	1.09022
hsa-miR-146b-5p	1921.98	1852.99	1602.24	804.768	864.398	1082.12	0.573554	0.0763511	1.48818
hsa-miR-147a	0.990327	2.34655	2.38331	0.881261	4.41878	2.61383	-0.881314	0.1874	0.542873
hsa-miR-147b-3p	50.5067	198.674	96.1992	28.5529	43.767	39.7302	1.1074	0.00408843	2.15457
hsa-miR-147b-5p	1.23791	0.782183	1.08332	0.352505	0	1.74255	0.175544	0.914707	1.12939
hsa-miR-148a-3p	17814.7	42178.4	34405.7	35735.3	27384.9	36050.2	-0.568412	0.0889373	0.674358
hsa-miR-148a-5p	493.431	538.924	630.712	306.15	405.897	374.997	0.198112	0.521384	1.1472
hsa-miR-148b-3p	2778.61	2802.04	5340.14	4120.78	3057.59	5093.65	-0.600454	0.0984674	0.659547
hsa-miR-148b-5p	53.2301	38.3269	52.8662	76.141	49.0275	76.1495	-0.875297	0.0185772	0.545142
hsa-miR-149-3p	3.21856	1.56437	1.94998	1.76252	0.841673	1.21979	0.412412	0.567872	1.33091
hsa-miR-149-5p	769.484	1248.62	893.743	271.252	386.749	338.926	1.10237	0.000386401	2.14707
hsa-miR-150-5p	1.73307	1.56437	3.6833	0.705009	2.73544	2.78808	-0.215089	0.779655	0.861493
hsa-miR-151a-3p	21479.5	59770.7	35563	19898.9	28462.9	22719.4	0.221124	0.515444	1.16564
hsa-miR-151a-5p	94.0811	390.048	187.415	45.4731	54.2879	101.416	1.22595	0.00350855	2.3391
hsa-miR-151b	13.617	56.0564	21.2332	5.11132	5.89171	11.3266	1.50558	0.00119307	2.8394
hsa-miR-152-3p	2895.96	5278.17	4788.08	2326.35	2930.5	2713.67	0.238918	0.429827	1.18011
hsa-miR-152-5p	107.946	64.3997	89.916	63.4508	67.9651	78.4148	-0.0385645	0.921076	0.973623
hsa-miR-153-3p	0	0	0.216665	0	0	0.174255	-0.0622241	1	0.957786
hsa-miR-1537-3p	3.71373	2.34655	2.38331	1.41002	1.89376	1.91681	0.308609	0.596942	1.23851
hsa-miR-1537-5p	1.48549	0	0	1.23377	0.841673	1.04553	-1.28076	0.360271	0.411579
hsa-miR-1538	0	0.521455	2.16665	1.76252	0.841673	1.04553	-0.913758	0.388058	0.530801
hsa-miR-155-3p	0	0	0.649995	0	0	0.522765	-0.0858395	1	0.942236
hsa-miR-155-5p	402.568	309.223	365.514	348.627	217.993	370.466	-0.192033	0.596912	0.875371
hsa-miR-1587	0	1.56437	0	0	0	0	3.96772	0.341104	15.646
hsa-miR-15a-3p	0.495164	1.30364	2.38331	1.05751	0	0.522765	0.833904	0.508793	1.7825
hsa-miR-15a-5p	70.0657	95.9477	96.6326	89.0074	73.8568	65.3457	-0.253491	0.429227	0.838864
hsa-miR-15b-3p	43.5744	94.9048	85.366	77.1985	64.388	84.5137	-0.499591	0.124359	0.707307
hsa-miR-15b-5p	140.626	348.853	224.032	197.931	157.182	212.94	-0.168337	0.612521	0.889868
hsa-miR-16-1-3p	116.611	83.1721	84.2827	73.3209	97.6341	80.3316	-0.189647	0.595748	0.87682
hsa-miR-16-2-3p	18.5686	13.8186	45.283	41.5955	14.7293	43.738	-0.80531	0.108063	0.572239
hsa-miR-16-5p	451.589	836.414	635.695	706.243	468.181	801.922	-0.511888	0.122863	0.701304
hsa-miR-17-3p	145.083	177.034	221.215	56.4007	90.4799	83.4682	0.816895	0.0110646	1.76161
hsa-miR-17-5p	3952.89	3796.71	4743.88	7216.83	4603.95	6556.7	-0.981311	0.00448367	0.506519
hsa-miR-181a-2-3p	195.094	439.587	313.948	141.002	167.493	217.819	0.376688	0.239622	1.29836
hsa-miR-181a-3p	279.767	406.213	462.146	322.542	228.935	525.205	-0.350751	0.323161	0.784176
hsa-miR-181a-5p	11599.7	8651.98	8121.47	3737.43	4718	3747.53	0.847392	0.0166764	1.79925
hsa-miR-181b-2-3p	1.98065	1.56437	3.6833	1.93877	0.631255	2.61383	0.0446173	1	1.03141
hsa-miR-181b-3p	13.617	34.9375	22.5332	18.859	16.623	17.5998	-0.0759332	0.836446	0.948728
hsa-miR-181b-5p	5889.97	4542.92	4208.5	3107.5	3493.78	3219.54	0.201186	0.558515	1.14964
hsa-miR-181c-3p	23.0251	55.7957	52.4329	16.3915	11.7834	28.0551	0.738232	0.0537555	1.66813
hsa-miR-181c-5p	22.5299	22.944	15.8165	8.81261	6.10213	5.92467	1.12792	0.00473155	2.18543
hsa-miR-181d-3p	0.247582	0	0	0.352505	0	0.34851	-1.5749	0.577326	0.335665
hsa-miR-181d-5p	522.645	350.157	341.247	242.347	300.477	234.896	0.282454	0.438968	1.21626
hsa-miR-182-3p	0.742745	2.868	3.6833	0.176252	0.841673	0.34851	1.92524	0.0372928	3.798
hsa-miR-182-5p	3362.16	2591.11	1802.22	2002.75	2328.7	1688.36	-0.00403189	0.991597	0.997209
hsa-miR-1827	0	0.521455	0.216665	0.352505	0	0.174255	-0.123088	1	0.91822
hsa-miR-183-3p	2.47582	3.91091	2.16665	1.58627	1.47293	1.74255	0.368481	0.5583	1.29099
hsa-miR-183-5p	1107.93	1388.9	1298.04	766.169	715.633	839.909	0.276165	0.361226	1.21097
hsa-miR-184	153.996	341.292	431.38	11.1039	19.5689	5363.92	-2.95138	0.0295555	0.129284
hsa-miR-1843	12.6267	27.8978	28.5998	18.154	10.5209	17.2513	0.0950065	0.812968	1.06807
hsa-miR-185-3p	31.1953	48.2346	50.0496	8.98887	17.8856	24.0472	0.919449	0.0107001	1.89139
hsa-miR-185-5p	2155.94	2897.99	1863.75	1258.62	1456.52	1326.95	0.345838	0.270674	1.27089
hsa-miR-186-3p	6.43713	2.08582	3.89997	2.99629	6.10213	2.09106	-0.168636	0.804805	0.889684
hsa-miR-186-5p	5642.39	4240.99	4061.17	3553.6	3638.55	3786.91	-0.0291088	0.932937	0.980025
hsa-miR-187-3p	9.40811	15.1222	15.1665	6.87384	10.1001	6.62169	0.305027	0.418296	1.23544
hsa-miR-187-5p	0.247582	0	0	0.176252	0	0	0.0957569	1	1.06863
hsa-miR-188-3p	0	0.260728	1.08332	0.881261	1.47293	0.522765	-1.46615	0.201729	0.361948
hsa-miR-188-5p	13.617	44.3237	31.8497	16.2152	17.6751	24.3957	0.12305	0.747085	1.08903
hsa-miR-18a-3p	268.626	193.721	219.265	104.165	140.139	111.175	0.567998	0.104359	1.48246
hsa-miR-18a-5p	121.563	162.173	162.499	213.97	137.824	213.637	-0.791352	0.0166537	0.577802
hsa-miR-18b-3p	0.990327	0.521455	0.216665	0.352505	0	0.34851	0.826781	0.714628	1.77372
hsa-miR-18b-5p	0.742745	2.08582	2.38331	0.352505	0	0.69702	1.72425	0.109536	3.30407
hsa-miR-1908-3p	1.73307	7.03964	10.3999	2.64378	5.26046	1.5683	0.528279	0.417585	1.44221
hsa-miR-1908-5p	19.8065	23.4655	43.7663	10.3989	17.4647	12.8949	0.665727	0.0789066	1.58637
hsa-miR-1909-3p	1.48549	1.82509	5.41662	1.23377	3.78753	1.39404	0.0369851	1	1.02597
hsa-miR-1909-5p	0.247582	0.521455	0	0.176252	0	0	1.25931	0.751214	2.39382
hsa-miR-190a-3p	1.23791	0.260728	0	0	0	0	4.30046	0.178946	19.7045
hsa-miR-190a-5p	5.4468	3.65019	4.3333	4.58256	4.20837	5.75042	-0.509773	0.276016	0.702333
hsa-miR-190b-5p	6.68471	4.6931	3.46664	2.82004	0.420837	3.4851	0.732381	0.258116	1.66138
hsa-miR-191-3p	13.3694	29.9837	20.1498	9.51762	8.41673	13.0691	0.553675	0.12731	1.46782
hsa-miR-191-5p	6244.51	5793.89	6264.43	4990.41	4353.55	5773.24	-0.127428	0.696171	0.915462
hsa-miR-1910-3p	0	5.47528	0.216665	0.528757	0	0	2.52668	0.152803	5.76244
hsa-miR-1910-5p	6.93229	15.9044	16.0332	4.23005	5.05004	6.9702	0.7857	0.0489432	1.72393
hsa-miR-1913	0	0	0.649995	0	0	0	2.99743	0.538646	7.98576
hsa-miR-1914-3p	1.48549	3.12873	0	1.41002	1.89376	0.522765	-0.211084	0.880649	0.863888
hsa-miR-1914-5p	1.98065	2.60728	8.44993	2.46753	2.3146	4.00787	0.12577	0.883148	1.09109
hsa-miR-1915-3p	0	0.260728	0.649995	0.352505	0	0	0.672918	1	1.59429
hsa-miR-1915-5p	0.990327	1.82509	0	0.352505	0	0.174255	1.76068	0.316775	3.38859
hsa-miR-192-5p	291.899	612.188	487.279	309.851	359.605	281.596	0.0677469	0.830871	1.04808
hsa-miR-193a-3p	19.559	43.5415	37.2664	5.99258	12.4147	9.06126	1.40757	0.000130109	2.6529
hsa-miR-193a-5p	140.626	274.285	180.265	69.0909	94.2674	82.2484	0.813769	0.00966172	1.7578
hsa-miR-193b-3p	1347.59	1639.98	1761.05	543.738	806.533	540.016	0.902292	0.00444212	1.86903
hsa-miR-193b-5p	146.816	185.377	181.782	122.495	178.645	92.3552	-0.0481866	0.887583	0.967151
hsa-miR-194-3p	0	2.08582	0	0.176252	0.420837	0.871275	-0.0998822	1	0.933109
hsa-miR-194-5p	41.5937	101.684	68.8995	54.8145	42.5045	36.4193	0.157539	0.659897	1.11538
hsa-miR-195-3p	4.95164	3.65019	6.49995	2.46753	3.78753	3.13659	0.291304	0.557495	1.22375
hsa-miR-195-5p	5.4468	11.472	5.84995	11.8089	7.57506	9.06126	-0.811693	0.048508	0.569713
hsa-miR-196a-3p	74.7697	90.7332	124.799	48.6456	68.1755	53.6706	0.33659	0.299756	1.26277
hsa-miR-196a-5p	334.235	459.402	450.23	349.861	312.261	381.27	-0.190808	0.530946	0.876115
hsa-miR-196b-3p	0.495164	1.56437	0	1.23377	1.05209	0.522765	-0.957543	0.421434	0.514933
hsa-miR-196b-5p	70.8084	115.242	102.699	100.993	78.2756	109.781	-0.462982	0.142083	0.725485
hsa-miR-197-3p	770.722	1319.02	778.694	571.586	625.994	604.142	0.215233	0.492808	1.16089
hsa-miR-197-5p	12.6267	13.2971	7.14994	4.93506	5.47088	3.65936	0.817271	0.0623851	1.76207
hsa-miR-1972	0	0.260728	1.08332	0	0	0.34851	1.30595	0.679938	2.47247
hsa-miR-1976	0.247582	0.260728	0.216665	0	0	0.174255	1.29297	0.712152	2.45031
hsa-miR-199a-3p	75.76	140.793	164.232	171.67	113.626	139.753	-0.646802	0.0607143	0.638695
hsa-miR-199a-5p	14.6073	25.2906	15.1665	25.9091	18.9376	17.2513	-0.649851	0.0709173	0.637346
hsa-miR-199b-3p	75.5125	140.793	163.582	171.493	113.415	139.753	-0.649093	0.0596322	0.637681
hsa-miR-199b-5p	147.064	137.403	176.799	421.243	258.604	410.196	-1.66209	2.79765e-06	0.315981
hsa-miR-19a-3p	240.65	63.6175	112.882	359.907	226.2	245.874	-1.3011	0.0117109	0.405817
hsa-miR-19a-5p	1.23791	1.82509	0	0.176252	0.841673	0.174255	0.931515	0.534361	1.90728
hsa-miR-19b-1-5p	39.1179	29.7229	24.2665	31.3729	39.1378	20.7364	-0.351826	0.37641	0.783592
hsa-miR-19b-3p	1232.96	483.389	503.096	802.653	811.373	560.404	-0.280949	0.545249	0.823049
hsa-miR-200a-3p	16.0928	30.7658	43.333	30.1391	38.717	12.7206	-0.339726	0.430039	0.790191
hsa-miR-200a-5p	1.48549	4.6931	3.46664	3.87755	8.41673	3.4851	-1.17038	0.0247584	0.444304
hsa-miR-200b-3p	19.0638	21.9011	32.4997	33.8404	38.0857	19.6908	-0.761827	0.0411323	0.589749
hsa-miR-200b-5p	0	1.56437	0.216665	0	1.05209	3.65936	-1.88962	0.162029	0.269878
hsa-miR-200c-3p	11.3888	9.12546	18.6332	23.4416	16.2022	12.1979	-0.841143	0.0474317	0.558201
hsa-miR-202-5p	1.73307	1.56437	3.46664	1.23377	0.631255	1.5683	0.531523	0.482632	1.44545
hsa-miR-203a-3p	65.3616	122.542	113.966	88.4786	61.6526	113.092	-0.273975	0.417543	0.827038
hsa-miR-203a-5p	0	0	0	0.176252	1.05209	0	-4.21255	0.168595	0.053938
hsa-miR-203b-3p	0	0.521455	0	0	0	0	2.57109	0.685966	5.94258
hsa-miR-204-3p	3.96131	8.86474	6.71661	3.34879	6.73338	7.31871	-0.282549	0.525064	0.822137
hsa-miR-204-5p	178.754	246.387	232.265	212.384	259.867	342.934	-0.738633	0.0169461	0.599307
hsa-miR-205-5p	4.95164	6.25746	3.03331	1.41002	3.99795	2.43957	0.454492	0.411764	1.3703
hsa-miR-206	6.93229	9.90765	6.49995	7.57885	7.15422	7.31871	-0.366893	0.352627	0.775451
hsa-miR-208b-3p	0.247582	0	0	0.176252	0	0	0.0956209	1	1.06853
hsa-miR-20a-3p	5.4468	2.08582	6.71661	3.34879	3.57711	3.31085	0.103159	0.8528	1.07412
hsa-miR-20a-5p	1310.45	1085.93	2885.76	4214.02	1718.91	3026.46	-1.21657	0.0067944	0.430306
hsa-miR-20b-5p	15.3501	18.7724	24.6998	35.0742	17.0439	24.2215	-0.838708	0.0290766	0.559144
hsa-miR-21-3p	2681.81	3716.93	3641.92	941.011	1342.26	1318.59	1.0481	0.000627002	2.06781
hsa-miR-21-5p	372209	253953	336579	375578	347862	388767	-0.586421	0.0975275	0.665993
hsa-miR-210-3p	3566.91	5966.49	3573.02	824.156	1165.09	1057.38	1.66085	2.83393e-07	3.16202
hsa-miR-210-5p	55.9535	115.763	55.6829	16.744	13.2564	13.9404	1.88447	3.9227e-07	3.69218
hsa-miR-211-3p	0.990327	4.43237	0.649995	4.0538	4.20837	0.69702	-1.10826	0.180282	0.463853
hsa-miR-211-5p	340.425	591.591	383.714	241.113	254.606	316.97	0.241649	0.436025	1.18234
hsa-miR-2110	60.6575	66.4855	48.7496	32.0779	48.1858	29.1006	0.27764	0.429794	1.21221
hsa-miR-2115-5p	0	0	0	0	0	0.34851	-2.59059	0.694068	0.166018
hsa-miR-2116-3p	10.646	19.8153	22.0998	11.1039	11.9938	13.7662	0.049673	0.902213	1.03503
hsa-miR-2116-5p	0	2.868	0	0.352505	0.210418	0.69702	0.513028	0.824392	1.42704
hsa-miR-212-3p	7.17987	13.8186	13.2166	6.87384	7.99589	9.58403	0.0255428	0.976056	1.01786
hsa-miR-212-5p	18.8162	19.2938	12.1332	12.6902	12.6251	13.2434	-0.0289681	0.970098	0.980121
hsa-miR-214-3p	0.495164	2.08582	1.08332	3.7013	1.89376	1.5683	-1.47871	0.045571	0.358809
hsa-miR-214-5p	0	1.82509	0	0.881261	1.26251	0.174255	-0.945489	0.517384	0.519253
hsa-miR-215-5p	13.1218	21.1189	22.5332	34.0167	43.3462	20.7364	-1.24928	0.000657782	0.420659
hsa-miR-216a-3p	0	0.521455	0	0	0	0.174255	0.741777	1	1.67223
hsa-miR-216b-5p	0	0	0	0	0.420837	0	-2.77836	0.698405	0.145757
hsa-miR-217-5p	1.98065	2.34655	6.71661	3.34879	4.6292	4.00787	-0.538614	0.311876	0.688432
hsa-miR-218-5p	12.3791	22.944	20.3665	17.449	23.146	17.774	-0.52695	0.110136	0.69402
hsa-miR-219a-1-3p	24.0154	68.3106	30.3331	10.0464	19.1481	16.9027	0.92875	0.015079	1.90363
hsa-miR-219a-2-3p	0.247582	1.04291	0.43333	0	0	0.69702	0.74308	0.742832	1.67375
hsa-miR-219a-5p	2.22824	0.521455	1.94998	0.881261	1.05209	1.74255	0.0106309	1	1.0074
hsa-miR-219b-3p	1.48549	2.08582	3.6833	2.46753	3.15627	1.74255	-0.450373	0.471486	0.731853
hsa-miR-219b-5p	2.7234	8.08255	5.41662	5.28757	3.99795	7.14446	-0.510309	0.265336	0.702072
hsa-miR-22-3p	4109.36	6989.32	5690.92	1548.9	1901.76	1953.75	1.18232	9.63836e-05	2.26942
hsa-miR-22-5p	80.9593	146.529	154.482	55.872	66.913	59.5952	0.600468	0.055758	1.51621
hsa-miR-221-3p	3506.5	4557.26	4360.82	2890.36	2516.39	3371.66	0.0647735	0.832858	1.04592
hsa-miR-221-5p	347.357	119.674	177.449	458.256	310.577	302.855	-1.05745	0.025771	0.480481
hsa-miR-222-3p	2335.19	2450.06	2202.18	1752.48	1390.23	1598.44	0.139484	0.66444	1.10151
hsa-miR-222-5p	14.3597	30.7658	36.183	12.3377	10.3105	14.2889	0.655755	0.0724181	1.57544
hsa-miR-223-3p	0.247582	0.260728	0.216665	1.58627	2.3146	0.69702	-2.95222	0.00704419	0.129209
hsa-miR-223-5p	0	0.260728	0	0.705009	0.631255	0	-2.57613	0.2893	0.16769
hsa-miR-224-3p	0	0.521455	0	0	0	0	2.57092	0.686927	5.94187
hsa-miR-224-5p	4.45647	5.73601	5.19996	3.17254	2.73544	5.92467	-0.0579201	0.959867	0.960648
hsa-miR-2276-3p	26.2437	65.9641	47.883	25.0278	32.4044	29.4491	0.204045	0.558873	1.15192
hsa-miR-2276-5p	3.71373	3.91091	2.59998	0	1.68335	0.871275	1.63031	0.0410192	3.09579
hsa-miR-2277-3p	8.41778	17.208	12.9999	2.46753	9.67924	3.13659	0.899488	0.071429	1.8654
hsa-miR-2277-5p	52.2398	63.0961	77.1327	64.8608	55.34	59.5952	-0.343835	0.284843	0.787944
hsa-miR-2278	10.1509	16.1651	9.09993	4.75881	11.9938	10.9781	-0.069351	0.88352	0.953067
hsa-miR-2355-3p	16.8356	16.6866	19.2832	11.6326	14.9397	21.2591	-0.259369	0.47856	0.835453
hsa-miR-2355-5p	2.22824	1.30364	2.81664	0.352505	1.05209	2.61383	0.292674	0.700983	1.22491
hsa-miR-23a-3p	2238.63	4249.86	2800.39	2009.1	1824.75	2172.44	0.158662	0.610211	1.11625
hsa-miR-23a-5p	13.617	15.6437	15.8165	9.34137	7.78548	3.4851	0.67933	0.115843	1.6014
hsa-miR-23b-3p	2448.09	3421.27	2334.13	2536.27	2274.83	2422.67	-0.260716	0.406167	0.834674
hsa-miR-23b-5p	49.5164	76.3932	74.0994	22.384	19.5689	31.8887	0.987354	0.00300633	1.98255
hsa-miR-23c	2.47582	3.38946	5.41662	1.58627	1.26251	3.13659	0.465758	0.469481	1.38104
hsa-miR-24-1-5p	59.9148	90.2117	111.149	70.3247	67.7547	40.7757	0.0765167	0.832016	1.05447
hsa-miR-24-2-5p	1220.83	1111.48	1316.24	718.933	866.292	471.011	0.415828	0.235347	1.33406
hsa-miR-24-3p	7393.78	15945.6	14044.7	7528.26	7426.92	8229.37	0.205965	0.515117	1.15346
hsa-miR-2467-3p	0.495164	1.56437	2.59998	0.352505	0.841673	1.04553	0.59404	0.576706	1.50947
hsa-miR-2467-5p	3.46615	5.99673	3.03331	1.93877	2.3146	1.5683	0.639538	0.247494	1.55783
hsa-miR-25-3p	6347.01	11427.7	10402.7	5791.65	6026.8	8936.67	-0.0159987	0.959843	0.988972
hsa-miR-25-5p	116.859	139.489	105.949	58.3395	76.1714	73.3614	0.387324	0.21694	1.30796
hsa-miR-2681-5p	0.247582	0	0	0	0.631255	0.174255	-1.63364	0.59966	0.322274
hsa-miR-2682-3p	3.21856	5.99673	3.6833	1.05751	1.89376	3.13659	0.628929	0.271857	1.54642
hsa-miR-2682-5p	31.6905	111.331	45.933	26.0853	27.5648	29.4491	0.665213	0.0862299	1.5858
hsa-miR-26a-1-3p	4.45647	6.77892	5.19996	3.87755	2.94586	3.65936	0.186618	0.703774	1.13809
hsa-miR-26a-2-3p	1.73307	4.95382	2.81664	3.34879	3.99795	2.61383	-0.548337	0.287472	0.683808
hsa-miR-26a-5p	2797.18	4266.81	5111.99	3909.98	2530.91	4346.62	-0.288324	0.393947	0.818853
hsa-miR-26b-3p	5.94196	9.12546	7.36661	2.46753	7.36464	2.78808	0.410981	0.416241	1.32959
hsa-miR-26b-5p	459.017	803.041	743.377	540.389	326.78	630.629	-0.0494292	0.885309	0.966319
hsa-miR-27a-3p	2051.71	8672.32	5206.46	1945.12	1557.31	2852.21	0.79727	0.0450452	1.73781
hsa-miR-27a-5p	980.919	2044.63	1069.89	428.293	645.774	507.257	0.906555	0.0063567	1.87456
hsa-miR-27b-3p	10207.1	23960.9	24386.3	13735.2	10395.5	19551.6	-0.0644381	0.856769	0.956318
hsa-miR-27b-5p	325.57	550.135	292.931	229.128	274.175	276.891	0.13479	0.674909	1.09793
hsa-miR-28-3p	3931.1	4951.48	4627.31	2643.43	3905.15	3246.2	0.0416432	0.892102	1.02929
hsa-miR-28-5p	116.859	245.084	281.448	114.211	94.8986	166.239	0.300309	0.392385	1.23141
hsa-miR-2861	0	0	0.43333	0	0	0	2.51164	0.690819	5.7027
hsa-miR-296-3p	39.6131	76.1324	76.0494	17.449	24.1981	25.4412	1.05451	0.001671	2.07701
hsa-miR-296-5p	2.47582	7.30037	11.9166	1.93877	5.89171	2.78808	0.572122	0.333628	1.48671
hsa-miR-299-3p	1.23791	1.56437	0.216665	1.93877	0	0.174255	-0.0189552	1	0.986947
hsa-miR-299-5p	0	0.782183	1.29999	0	0	0.34851	1.85799	0.381768	3.62503
hsa-miR-29a-3p	5376.98	5570.18	6105.84	4188.11	3265.06	4671.95	0.0731824	0.821171	1.05203
hsa-miR-29a-5p	126.762	100.641	82.3327	54.9907	71.963	46.8746	0.456281	0.211596	1.372
hsa-miR-29b-1-5p	28.4719	26.0728	18.1999	15.3339	14.7293	11.1523	0.414549	0.269814	1.33288
hsa-miR-29b-2-5p	4.95164	1.04291	4.76663	3.52505	2.73544	3.83361	-0.257308	0.709269	0.836648
hsa-miR-29b-3p	2758.56	1917.91	2308.57	962.69	1276.61	1035.77	0.72397	0.0380064	1.65172
hsa-miR-29c-3p	16.3404	22.1618	24.4831	8.81261	11.9938	10.9781	0.552294	0.102172	1.46642
hsa-miR-29c-5p	69.3229	63.8782	56.9829	48.4694	43.767	32.5857	0.1957	0.585756	1.14528
hsa-miR-301a-3p	33.176	17.7295	24.4831	56.7532	36.4024	32.0629	-1.11337	0.0104648	0.462214
hsa-miR-301a-5p	16.0928	23.4655	35.7497	37.3655	15.571	41.8212	-0.798089	0.0559747	0.57511
hsa-miR-301b-3p	35.4042	31.2873	38.3497	23.4416	24.8294	29.1006	0.0394845	0.910186	1.02775
hsa-miR-301b-5p	0.247582	0.782183	1.51665	0.352505	1.68335	2.61383	-1.25479	0.190427	0.419056
hsa-miR-302a-3p	0	1.30364	1.29999	0.352505	0	1.04553	0.330762	0.905407	1.25768
hsa-miR-302a-5p	0.990327	1.56437	4.3333	0.528757	0.210418	1.04553	1.4425	0.132228	2.71791
hsa-miR-302b-3p	0	0.260728	1.29999	1.05751	0	0.522765	-0.532356	0.801797	0.691425
hsa-miR-302c-3p	0	1.82509	0.86666	0	0	0.174255	2.92014	0.147258	7.56922
hsa-miR-302d-3p	0.990327	1.56437	0.649995	0	0	0	5.15108	0.0113595	35.5327
hsa-miR-3064-3p	0	0.521455	0	0.528757	0	0	-0.672923	1	0.627234
hsa-miR-3064-5p	2.7234	5.73601	4.76663	2.82004	1.26251	2.09106	0.596333	0.274932	1.51187
hsa-miR-3065-3p	0	2.08582	0.216665	0.705009	0	0.522765	0.215616	1	1.1612
hsa-miR-3065-5p	11.1412	9.12546	6.49995	15.5102	6.52297	10.4553	-0.698793	0.142042	0.616087
hsa-miR-3074-3p	0.742745	0.260728	0.649995	1.58627	0	0.522765	-0.768607	0.632587	0.586984
hsa-miR-3074-5p	13.617	21.3797	16.2499	7.7551	9.88966	13.9404	0.258397	0.464553	1.19615
hsa-miR-30a-3p	1233.95	1896.01	1662.04	772.69	905.64	1005.8	0.392089	0.187633	1.31229
hsa-miR-30a-5p	22563.4	13561.5	17051.7	22677.1	25719.8	18662.2	-0.697465	0.0632101	0.616655
hsa-miR-30b-3p	59.9148	77.6968	88.3993	40.8905	47.3441	62.5576	0.154563	0.628661	1.11308
hsa-miR-30b-5p	2399.32	3297.94	2483.63	1984.07	1585.29	2614.52	-0.0309255	0.923809	0.978792
hsa-miR-30c-1-3p	26.9864	32.5909	29.4664	18.154	19.1481	19.3423	0.223095	0.472124	1.16723
hsa-miR-30c-2-3p	314.924	330.342	295.964	186.299	262.392	212.591	0.105481	0.738796	1.07585
hsa-miR-30c-5p	2105.93	1953.37	2187.88	1741.72	1216.85	1926.74	-0.0545301	0.871413	0.962908
hsa-miR-30d-3p	234.708	282.107	231.832	173.961	171.912	238.207	-0.0601925	0.849871	0.959136
hsa-miR-30d-5p	31170.1	25405.5	31319.1	45458.8	34389.3	44525.5	-0.9015	0.00911344	0.53533
hsa-miR-30e-3p	211.682	374.665	456.296	254.685	199.687	320.107	-0.0405454	0.904394	0.972287
hsa-miR-30e-5p	3011.34	1540.38	3397.96	3148.92	2406.76	2962.68	-0.477039	0.223574	0.718451
hsa-miR-31-3p	41.5937	33.6338	35.9664	32.4304	23.7773	22.4789	0.0901363	0.803153	1.06447
hsa-miR-31-5p	209.702	338.424	238.115	118.618	110.68	145.677	0.617216	0.0463535	1.53391
hsa-miR-3115	2.22824	3.12873	5.41662	2.46753	1.47293	1.74255	0.45571	0.494866	1.37146
hsa-miR-3116	0	0	0	0.176252	0	0.522765	-3.50721	0.316362	0.0879478
hsa-miR-3118	0.990327	0.782183	1.73332	0.528757	1.05209	0.34851	0.463546	0.693593	1.37893
hsa-miR-3119	0	0	0	0.176252	0.210418	0	-2.74077	0.605809	0.149605
hsa-miR-3120-3p	0.742745	0	2.59998	0.176252	0.420837	0.871275	0.79224	0.587422	1.73176
hsa-miR-3120-5p	0	0.521455	0.43333	0	0	0	3.41984	0.290513	10.7022
hsa-miR-3121-3p	0.495164	0	0	0	1.05209	0.34851	-1.54352	0.488114	0.343048
hsa-miR-3122	0.247582	2.08582	0.43333	0.176252	0	0	2.9196	0.119153	7.56637
hsa-miR-3124-3p	0.247582	0	0.649995	0	0	0.34851	0.873917	0.822666	1.83263
hsa-miR-3124-5p	2.22824	4.43237	3.89997	1.23377	3.78753	1.21979	0.32772	0.653115	1.25503
hsa-miR-3125	6.43713	10.9506	7.36661	7.05009	15.7814	8.71275	-0.784019	0.0564289	0.580747
hsa-miR-3126-3p	0	0	0	0.352505	0	0.34851	-3.5462	0.298446	0.0856027
hsa-miR-3126-5p	3.21856	6.25746	2.81664	2.29128	0.631255	1.04553	1.10208	0.101977	2.14664
hsa-miR-3127-3p	2.7234	4.43237	6.71661	0.705009	1.68335	2.78808	0.982372	0.108931	1.97571
hsa-miR-3127-5p	3.96131	5.73601	6.93328	3.34879	2.73544	2.43957	0.506125	0.287095	1.42023
hsa-miR-3128	3.71373	2.60728	4.3333	6.34508	8.62715	5.57616	-1.34032	0.00319446	0.394933
hsa-miR-3129-3p	0	0	0	0	0	0.34851	-2.59044	0.694731	0.166035
hsa-miR-3129-5p	0	0	0	0	0.420837	0	-2.77845	0.698935	0.145748
hsa-miR-3130-3p	1.23791	0.521455	3.03331	0.881261	1.05209	2.43957	-0.24739	0.809946	0.842419
hsa-miR-3130-5p	3.96131	9.90765	5.84995	5.28757	4.6292	9.58403	-0.462032	0.31126	0.725963
hsa-miR-3131	6.68471	24.2477	14.7332	4.40631	8.62715	5.75042	0.785227	0.0728643	1.72336
hsa-miR-3133	9.65569	6.25746	7.79994	10.7514	15.7814	11.6751	-1.06387	0.00862452	0.478348
hsa-miR-3134	1.48549	0.782183	2.59998	4.93506	0.210418	2.43957	-1.08602	0.233375	0.47106
hsa-miR-3135a	0.495164	3.12873	0.43333	0.881261	1.47293	2.43957	-0.758462	0.40201	0.591126
hsa-miR-3136-3p	0.247582	0	0	0	0.420837	0.174255	-1.24194	0.757141	0.422802
hsa-miR-3136-5p	2.7234	5.99673	3.24997	2.11503	0.420837	1.74255	0.953768	0.142257	1.93692
hsa-miR-3137	0.247582	0	2.38331	2.29128	1.26251	1.21979	-1.27062	0.237406	0.414483
hsa-miR-3138	10.8936	19.2938	14.9499	8.28386	6.73338	6.62169	0.587475	0.10589	1.50261
hsa-miR-3139	2.22824	0.521455	2.59998	1.76252	0.631255	1.74255	-0.0130369	1	0.991004
hsa-miR-3140-3p	2.22824	9.90765	3.24997	2.46753	4.41878	1.04553	0.433202	0.522308	1.35023
hsa-miR-3140-5p	0.990327	0	0	0	0.210418	0.522765	0.268235	1	1.20433
hsa-miR-3141	0	0	0.86666	0	0	0.174255	1.5327	0.800398	2.89326
hsa-miR-3142	4.20889	11.7327	11.6999	6.16883	5.47088	5.75042	0.175722	0.731313	1.12953
hsa-miR-3143	0	0.260728	1.29999	1.41002	0	2.09106	-1.5903	0.2561	0.332103
hsa-miR-3144-3p	13.617	30.2444	22.9665	33.6642	17.0439	53.6706	-1.12168	0.00653362	0.459559
hsa-miR-3144-5p	1.23791	1.04291	0.86666	1.58627	0.841673	0	-0.0779419	1	0.947408
hsa-miR-3145-3p	10.646	6.25746	10.6166	22.0315	18.3064	18.6453	-1.49113	0.000199494	0.355735
hsa-miR-3145-5p	1.73307	4.43237	2.59998	4.23005	2.94586	5.0534	-0.962917	0.055959	0.513019
hsa-miR-3146	1.73307	2.60728	5.19996	1.23377	1.47293	3.31085	0.226889	0.793115	1.17031
hsa-miR-3147	3.71373	7.03964	8.23327	2.82004	4.6292	4.35638	0.240206	0.628743	1.18116
hsa-miR-3148	8.66536	15.9044	19.2832	7.22634	3.78753	4.70489	0.985529	0.0204208	1.98004
hsa-miR-3149	0.742745	0	0	0.528757	0	0	0.175631	1	1.12946
hsa-miR-3150a-3p	0.742745	0.260728	1.51665	0	0.841673	0.522765	0.540743	0.69728	1.45472
hsa-miR-3150a-5p	11.3888	22.6833	17.1165	6.69759	6.9438	6.09893	0.900797	0.0112873	1.8671
hsa-miR-3150b-3p	4.20889	7.03964	7.14994	1.58627	2.94586	2.43957	0.959048	0.0470758	1.94403
hsa-miR-3150b-5p	0.495164	0.260728	1.51665	0	0.420837	0.522765	0.862265	0.643545	1.81789
hsa-miR-3152-5p	0	0	0.86666	0	0.631255	0.174255	-0.235658	1	0.849298
hsa-miR-3154	2.47582	0.521455	1.73332	0.528757	4.41878	2.78808	-0.981266	0.263664	0.506535
hsa-miR-3156-5p	0	0	0	0.352505	0	0.69702	-4.05869	0.17549	0.0600086
hsa-miR-3157-3p	0.495164	2.34655	7.14994	1.23377	0.631255	1.74255	0.953923	0.268734	1.93713
hsa-miR-3157-5p	0.495164	1.56437	0.86666	0.528757	1.05209	0.34851	0.131024	1	1.09507
hsa-miR-3158-3p	232.232	598.891	443.513	123.553	262.392	141.844	0.790719	0.0302207	1.72994
hsa-miR-3158-5p	0	0.521455	0	0	0	0	2.57072	0.688022	5.94108
hsa-miR-3160-3p	0	0	0	0.176252	0.420837	0.174255	-3.60112	0.238058	0.0824052
hsa-miR-3161	5.19922	11.2113	14.5166	6.52133	4.20837	9.40977	0.140534	0.774058	1.10231
hsa-miR-3162-5p	0	1.30364	1.94998	0.881261	0	0.34851	0.765637	0.64716	1.70012
hsa-miR-3164	7.42745	5.99673	8.0166	2.99629	6.31255	3.83361	0.321947	0.488678	1.25002
hsa-miR-3165	0	0.260728	0.649995	0.528757	0	0	0.157172	1	1.1151
hsa-miR-3167	0	0	0.216665	0.528757	0	0.34851	-2.06366	0.451714	0.239209
hsa-miR-3170	0.742745	2.34655	0	3.52505	1.68335	3.13659	-1.94947	0.0191654	0.258912
hsa-miR-3173-3p	0	1.30364	0.43333	1.41002	1.26251	0.174255	-1.25927	0.303039	0.417756
hsa-miR-3173-5p	4.95164	6.77892	8.44993	6.69759	8.62715	8.01573	-0.641614	0.0948009	0.640996
hsa-miR-3174	2.97098	3.91091	6.93328	1.41002	1.26251	2.61383	0.934254	0.101255	1.9109
hsa-miR-3175	4.20889	9.38619	6.06662	3.17254	1.68335	3.31085	0.766617	0.109392	1.70128
hsa-miR-3176	28.9671	58.9244	41.8163	20.974	32.4044	23.1759	0.296095	0.371094	1.22782
hsa-miR-3177-3p	21.0445	22.6833	26.2165	7.4026	6.31255	9.23552	1.17891	0.000951452	2.26405
hsa-miR-3177-5p	1.23791	2.08582	0	1.93877	0	1.91681	-0.695717	0.574053	0.617402
hsa-miR-3179	1.73307	0	0.86666	0.528757	1.26251	2.43957	-0.941422	0.40322	0.520719
hsa-miR-3181	1.73307	0.260728	0.649995	0	0	0	5.04583	0.0315446	33.0329
hsa-miR-3182	0.247582	0	0.43333	0	0	0	3.14586	0.415717	8.85114
hsa-miR-3183	4.95164	4.17164	7.14994	1.41002	2.3146	1.91681	1.12215	0.03353	2.17671
hsa-miR-3184-3p	0	2.08582	2.16665	0.881261	1.47293	2.09106	-0.56057	0.55822	0.678034
hsa-miR-3184-5p	8.1702	9.12546	5.84995	7.05009	3.78753	10.1068	-0.283879	0.562716	0.82138
hsa-miR-3187-3p	89.1295	150.7	116.132	40.3618	56.1817	50.3597	0.827215	0.00717075	1.77426
hsa-miR-3187-5p	3.96131	5.21455	5.19996	1.76252	1.47293	1.74255	1.07218	0.0333203	2.1026
hsa-miR-3188	0	0.260728	0.86666	0.176252	0	0	1.76337	0.587023	3.39491
hsa-miR-3189-3p	1.73307	2.868	0.86666	1.58627	0.841673	1.74255	-0.0888613	1	0.940265
hsa-miR-3189-5p	1.98065	0	0.216665	1.93877	1.47293	0.69702	-1.14073	0.386735	0.453531
hsa-miR-3190-3p	13.1218	23.4655	19.2832	3.7013	9.67924	5.75042	1.10963	0.00494251	2.1579
hsa-miR-3190-5p	0	0	0.86666	0.176252	0	0	1.43629	0.802114	2.70623
hsa-miR-3191-3p	1.73307	4.17164	0.43333	0	1.47293	0.34851	1.3549	0.274557	2.55779
hsa-miR-3191-5p	0.247582	0	0	0.176252	0.420837	0.34851	-1.94311	0.381106	0.260054
hsa-miR-3192-3p	0	0	0	0	0.420837	0.174255	-3.22389	0.422249	0.107032
hsa-miR-3192-5p	2.47582	4.17164	0	1.23377	2.52502	1.39404	-0.0691209	1	0.953219
hsa-miR-3193	0	0	0.216665	0.176252	0	0.174255	-0.8778	1	0.544197
hsa-miR-3194-3p	0.495164	0.521455	0.216665	1.58627	1.68335	0.34851	-1.9326	0.0835503	0.261956
hsa-miR-3194-5p	0	0.782183	0.43333	0.176252	0.631255	0.69702	-0.762269	0.586126	0.589568
hsa-miR-3197	0.990327	0.782183	3.03331	0.528757	0	0.34851	1.88699	0.0958297	3.69863
hsa-miR-3198	0.990327	0.260728	1.29999	0	1.89376	1.39404	-0.650497	0.643224	0.637061
hsa-miR-3199	3.21856	1.82509	2.38331	1.41002	2.3146	0.871275	0.320909	0.700393	1.24912
hsa-miR-32-3p	0.742745	1.82509	5.63329	4.58256	2.10418	6.44744	-1.13946	0.0829011	0.453928
hsa-miR-32-5p	53.9728	41.1949	97.9326	159.508	91.1111	131.737	-1.41672	0.00049747	0.374562
hsa-miR-3200-3p	4.20889	4.95382	2.59998	4.0538	3.78753	3.13659	-0.339451	0.539429	0.790342
hsa-miR-3200-5p	0	0	0	0	0.631255	0.174255	-3.6188	0.326942	0.0814015
hsa-miR-3202	0	0.521455	0	0	0	0.34851	-0.0219542	1	0.984898
hsa-miR-320a-3p	10769.3	9154.66	8615.9	7483.85	11246.6	6505.99	-0.20736	0.55875	0.866121
hsa-miR-320a-5p	0	1.30364	0.216665	0.352505	0.631255	1.04553	-0.938244	0.463473	0.521868
hsa-miR-320b	558.545	760.281	710.228	212.736	343.403	273.232	0.86279	0.00588508	1.81855
hsa-miR-320c	162.909	309.744	289.031	60.9833	101.842	80.3316	1.18861	0.0002479	2.27933
hsa-miR-320d	68.8277	185.899	146.249	28.0241	54.7088	36.5936	1.26525	0.000458016	2.4037
hsa-miR-320e	21.7872	19.0331	17.5499	14.8052	19.9897	10.9781	-0.0468688	0.913154	0.968035
hsa-miR-323a-3p	2.22824	4.95382	6.71661	3.87755	4.41878	3.4851	-0.222116	0.643673	0.857307
hsa-miR-323a-5p	0	1.04291	0	0	0	0	3.43215	0.432741	10.794
hsa-miR-323b-3p	0.495164	0	1.08332	0.352505	0.631255	0	0.312696	0.878767	1.24203
hsa-miR-324-3p	85.4157	222.401	141.266	53.0519	61.2317	67.7852	0.812033	0.0138733	1.75568
hsa-miR-324-5p	156.472	266.464	194.132	103.46	108.997	105.076	0.498856	0.101754	1.41309
hsa-miR-326	180.24	305.312	278.414	83.1911	154.657	112.917	0.677656	0.0367753	1.59954
hsa-miR-328-3p	184.944	317.566	206.698	36.308	40.4003	60.815	1.92012	1.05065e-08	3.78455
hsa-miR-328-5p	0	0	0.43333	0	0	0	2.51186	0.690077	5.70357
hsa-miR-329-3p	0.495164	2.60728	3.24997	0.528757	1.05209	1.04553	0.782924	0.383793	1.72062
hsa-miR-330-3p	730.119	755.849	764.394	662.18	629.571	688.133	-0.230452	0.461665	0.852368
hsa-miR-330-5p	759.333	1478.59	1298.69	427.412	539.302	510.916	0.79147	0.0103696	1.73084
hsa-miR-331-3p	273.578	500.075	435.93	221.02	299.636	265.739	0.161058	0.598068	1.11811
hsa-miR-331-5p	3.71373	36.2411	24.4831	19.7403	12.8355	24.0472	-0.379507	0.464681	0.7687
hsa-miR-335-3p	0.990327	0.782183	1.94998	1.05751	0.631255	1.21979	-0.0701878	1	0.952514
hsa-miR-335-5p	0.742745	0.260728	0.216665	0	0.210418	0.174255	1.2295	0.612594	2.34486
hsa-miR-338-3p	1.73307	2.60728	3.89997	2.29128	0	2.26532	0.355441	0.717274	1.27938
hsa-miR-338-5p	1.48549	1.56437	2.81664	3.87755	1.68335	5.92467	-1.39029	0.0256447	0.381488
hsa-miR-339-3p	512.99	936.272	612.295	289.23	316.259	263.648	0.778846	0.0129261	1.71576
hsa-miR-339-5p	270.607	604.888	497.896	280.946	212.522	398.696	0.140534	0.682088	1.10231
hsa-miR-33a-3p	3.46615	10.4291	4.54996	6.52133	1.89376	9.40977	-0.46364	0.421698	0.725154
hsa-miR-33a-5p	14.3597	21.6404	17.3332	6.52133	5.68129	10.4553	0.786378	0.0317793	1.72474
hsa-miR-33b-3p	8.66536	17.4687	13.8666	7.4026	13.4668	12.7206	-0.198141	0.601569	0.871673
hsa-miR-33b-5p	0	0.260728	1.94998	0	0.210418	0	2.65966	0.224786	6.31883
hsa-miR-340-3p	28.7195	22.6833	38.3497	47.4119	39.3482	47.2231	-0.987663	0.00669771	0.504294
hsa-miR-340-5p	629.848	448.451	1116.47	1491.8	793.277	1893.46	-1.34214	0.00172413	0.394435
hsa-miR-342-3p	76.9979	52.9277	47.4496	66.9759	75.961	60.9893	-0.567664	0.127259	0.674708
hsa-miR-342-5p	1.98065	0.782183	2.59998	1.23377	2.94586	1.91681	-0.532345	0.495311	0.69143
hsa-miR-345-3p	3.96131	5.21455	1.29999	2.11503	3.36669	1.74255	0.109599	0.862607	1.07893
hsa-miR-345-5p	1467.91	2737.12	2523.06	629.044	863.136	681.86	1.16479	0.000195698	2.242
hsa-miR-34a-3p	0	0	0.216665	0.705009	0.210418	0	-2.13981	0.474339	0.22691
hsa-miR-34a-5p	50.2591	60.2281	53.7329	67.3284	36.8232	62.0348	-0.45941	0.196672	0.727284
hsa-miR-34b-3p	10.8936	10.4291	8.44993	14.6289	10.7313	6.9702	-0.550571	0.200529	0.68275
hsa-miR-34b-5p	0.247582	1.30364	0.649995	0.881261	1.68335	1.21979	-1.22911	0.166261	0.426582
hsa-miR-34c-3p	5.19922	9.38619	8.88326	3.87755	2.94586	4.70489	0.554641	0.188045	1.4688
hsa-miR-34c-5p	179.744	203.628	218.832	329.768	312.05	294.84	-1.06821	0.000631569	0.476911
hsa-miR-3605-3p	5.69438	10.4291	14.0832	6.69759	6.9438	6.62169	0.113615	0.797765	1.08194
hsa-miR-3605-5p	5.94196	11.9935	9.31659	3.34879	8.62715	4.00787	0.325993	0.47733	1.25353
hsa-miR-3609	1.48549	0.521455	3.24997	1.41002	1.05209	1.5683	-0.0152857	1	0.989461
hsa-miR-361-3p	1694.95	1802.67	1653.37	1674.4	1548.89	1586.07	-0.319248	0.309021	0.801487
hsa-miR-361-5p	62.6382	95.687	131.949	69.7959	60.6005	93.4007	-0.0800815	0.813837	0.946004
hsa-miR-3611	10.8936	10.1684	10.3999	4.23005	3.99795	5.40191	0.790418	0.0496462	1.72958
hsa-miR-3613-3p	6.93229	4.6931	3.6833	4.58256	3.15627	2.43957	0.184986	0.751491	1.13681
hsa-miR-3613-5p	33.4235	40.152	87.7493	122.672	66.0713	114.66	-1.37463	0.000836878	0.385652
hsa-miR-3614-3p	1.98065	0.521455	0.649995	1.41002	1.68335	1.04553	-0.718515	0.456797	0.607722
hsa-miR-3614-5p	1.48549	4.6931	4.3333	2.64378	1.47293	2.78808	0.102663	0.895856	1.07375
hsa-miR-3615	467.187	858.576	624.212	351.8	437.67	423.266	0.22518	0.459437	1.16892
hsa-miR-3616-5p	0	0	0.86666	0	0	0	3.35996	0.531671	10.2671
hsa-miR-3617-3p	0	2.08582	0	0	0	0	4.35864	0.214537	20.5154
hsa-miR-3617-5p	0	0.260728	0.216665	0.528757	0.631255	0.174255	-1.77918	0.360071	0.291349
hsa-miR-3619-3p	1.98065	2.868	1.73332	1.41002	1.47293	0.34851	0.565853	0.484878	1.48026
hsa-miR-3619-5p	0.247582	2.60728	2.81664	1.41002	1.47293	1.21979	-0.0444506	0.932224	0.969659
hsa-miR-362-3p	3.71373	5.73601	6.28328	2.46753	6.10213	5.57616	-0.266012	0.578623	0.831615
hsa-miR-362-5p	288.68	175.209	167.915	287.82	254.185	230.365	-0.649523	0.092468	0.637491
hsa-miR-3620-3p	0.990327	5.21455	2.81664	0.176252	2.10418	2.26532	0.5051	0.560999	1.41922
hsa-miR-3620-5p	1.23791	8.34328	7.36661	0.528757	1.26251	0.871275	2.14212	0.00224947	4.4141
hsa-miR-3622a-5p	0.247582	0	0	0	0	0.174255	0.180292	1	1.13311
hsa-miR-3622b-5p	0	0	0	0.352505	0	0	-2.73306	0.693908	0.150407
hsa-miR-363-3p	1.73307	1.30364	2.16665	0.705009	3.99795	1.21979	-0.536297	0.564062	0.689539
hsa-miR-3651	0	0	0	0	0	0.871275	-3.74395	0.357613	0.074638
hsa-miR-3652	0	0.782183	1.94998	0	0	0	4.86783	0.0613411	29.1987
hsa-miR-3657	0.495164	0.782183	0.86666	1.23377	0	0.34851	-0.0936171	1	0.93717
hsa-miR-3659	0	0	0	0.528757	0	0.522765	-4.08641	0.170979	0.0588666
hsa-miR-365a-3p	179.992	108.723	137.582	322.189	191.481	250.927	-1.22244	0.00202405	0.428556
hsa-miR-365a-5p	770.722	501.118	652.595	527.347	715.001	423.266	-0.161825	0.663727	0.893894
hsa-miR-365b-3p	179.992	108.723	137.582	322.189	191.481	250.927	-1.22244	0.00202488	0.428556
hsa-miR-365b-5p	28.2243	38.5877	26.6498	21.1503	23.9877	25.964	-0.0382571	0.914239	0.973831
hsa-miR-3661	13.3694	25.0298	19.4998	4.23005	6.9438	6.62169	1.24904	0.000538067	2.37684
hsa-miR-3662	16.0928	4.6931	4.98329	7.05009	14.3084	4.70489	-0.292716	0.657678	0.816364
hsa-miR-3663-5p	0.495164	0	0	0.352505	0.210418	0.871275	-1.68201	0.337005	0.311648
hsa-miR-3664-5p	0	0.521455	0	0	0	0	2.57061	0.688682	5.9406
hsa-miR-3667-3p	19.0638	20.3367	12.5666	9.34137	12.8355	13.7662	0.130519	0.717693	1.09469
hsa-miR-3667-5p	0.990327	0	1.08332	1.05751	1.05209	1.04553	-0.921825	0.410638	0.527841
hsa-miR-3677-3p	14.3597	27.3764	15.3832	7.05009	12.6251	10.281	0.480855	0.192063	1.39557
hsa-miR-3677-5p	0	2.08582	2.38331	0.176252	0.210418	0.34851	1.96752	0.13463	3.91096
hsa-miR-3678-3p	0	0	0	0	0.841673	0	-3.67923	0.446836	0.0780625
hsa-miR-3679-3p	0.495164	3.91091	0	1.23377	0.841673	0.34851	0.239293	0.933734	1.18041
hsa-miR-3679-5p	30.9477	71.9608	47.4496	14.4527	19.7793	18.1225	1.04488	0.00159108	2.06319
hsa-miR-3680-3p	0.495164	1.30364	0	0.528757	0.631255	0.69702	-0.530612	0.768693	0.692261
hsa-miR-3680-5p	2.47582	5.47528	3.89997	2.46753	1.26251	4.00787	0.128355	0.810958	1.09305
hsa-miR-3681-5p	7.92262	17.7295	7.79994	6.16883	8.62715	5.75042	0.228924	0.595781	1.17196
hsa-miR-3682-3p	0.990327	1.56437	3.46664	0.881261	1.26251	0.69702	0.638773	0.502887	1.557
hsa-miR-3684	0	0.521455	2.38331	0.176252	0	0	3.04901	0.143308	8.27644
hsa-miR-3685	0.742745	1.82509	0.216665	1.93877	0.420837	1.5683	-1.00902	0.3397	0.496883
hsa-miR-3688-3p	2.47582	3.91091	0.43333	2.29128	1.47293	4.87914	-0.785132	0.325699	0.580299
hsa-miR-3689a-3p	0	0.782183	1.94998	0.352505	0	0.871275	0.608995	0.807459	1.5252
hsa-miR-3689a-5p	158.452	252.123	184.382	127.43	145.399	193.249	-0.0889778	0.776336	0.940189
hsa-miR-3689b-3p	0	0	1.51665	0	0	0	4.09857	0.270865	17.1314
hsa-miR-3689b-5p	158.452	252.123	184.382	127.43	145.399	193.249	-0.0889772	0.776528	0.940189
hsa-miR-3689e	158.452	252.123	184.382	127.43	145.399	193.249	-0.0889771	0.776558	0.940189
hsa-miR-3689f	185.934	252.906	250.248	145.408	198.635	207.015	-0.107123	0.725172	0.928438
hsa-miR-369-3p	1.23791	0	0.216665	0.176252	0	1.04553	0.0399797	1	1.0281
hsa-miR-369-5p	0	0	0	0.176252	0	0.34851	-3.15245	0.412246	0.112465
hsa-miR-3690	13.8646	31.0266	7.36661	17.0965	23.5668	10.8038	-0.460636	0.326054	0.726666
hsa-miR-3691-3p	0.990327	0	1.29999	0.881261	0	1.21979	-0.233169	0.919456	0.850764
hsa-miR-3691-5p	15.1025	22.1618	12.3499	14.6289	23.146	15.683	-0.540535	0.132867	0.687516
hsa-miR-3692-3p	0	0.782183	0	0.528757	0	0.174255	-0.502837	1	0.705718
hsa-miR-3692-5p	0	0	1.51665	1.05751	0	0.69702	-0.683551	0.743859	0.622631
hsa-miR-370-3p	1.98065	2.60728	3.03331	0.881261	4.41878	0.69702	-0.046054	1	0.968582
hsa-miR-371a-3p	0.247582	0	0	0	0	0.174255	0.181369	1	1.13396
hsa-miR-371a-5p	0.495164	0	0	0.352505	0.631255	2.09106	-2.74527	0.0638133	0.149139
hsa-miR-372-3p	4.95164	3.65019	3.89997	16.2152	13.0459	13.0691	-2.16951	2.84655e-07	0.222286
hsa-miR-372-5p	0	0	0	0	0	0.522765	-3.08501	0.53604	0.117848
hsa-miR-373-3p	1.73307	0.782183	0	0.352505	0	0	2.24065	0.275712	4.72611
hsa-miR-374a-3p	26.2437	10.1684	97.2826	65.5658	43.3462	56.1101	-0.744975	0.205447	0.596678
hsa-miR-374a-5p	45.0599	37.5448	165.532	97.4675	42.7149	128.426	-0.565174	0.287504	0.675874
hsa-miR-374b-3p	4.20889	5.47528	16.4665	7.05009	2.3146	8.5385	0.0760663	0.921168	1.05414
hsa-miR-374b-5p	36.1469	36.5019	111.149	67.8571	22.7252	97.4086	-0.482915	0.356126	0.71553
hsa-miR-374c-5p	0.247582	0.260728	0.216665	0	0	0	3.1576	0.350419	8.92344
hsa-miR-375-3p	22.5299	49.799	38.3497	17.449	25.4606	29.2749	0.151326	0.654605	1.11059
hsa-miR-376a-3p	0	0	0	0.352505	0	0.871275	-4.25893	0.136713	0.0522317
hsa-miR-376b-3p	0.990327	0	0	0	0	0	3.82257	0.394915	14.1484
hsa-miR-376c-3p	1.23791	0	0.43333	1.41002	0	1.21979	-0.937259	0.56594	0.522224
hsa-miR-378a-3p	13889.8	29003.8	20180.6	8484.78	14331.4	10578.9	0.451712	0.165571	1.36766
hsa-miR-378a-5p	57.1914	118.37	66.5161	38.423	41.8732	54.8903	0.373139	0.258994	1.29517
hsa-miR-378b	4.20889	15.9044	9.53326	1.41002	6.10213	4.53063	0.8216	0.125391	1.76736
hsa-miR-378c	1676.62	4542.92	3061.91	549.731	1108.69	892.012	1.38332	0.000103829	2.60868
hsa-miR-378d	496.154	1806.32	1499.54	207.978	451.347	343.282	1.42331	0.000363145	2.68201
hsa-miR-378e	17.5783	35.9804	29.8998	2.99629	6.10213	8.18999	1.81677	4.18571e-06	3.52293
hsa-miR-378f	111.659	198.674	128.699	38.5992	72.3839	62.7318	0.89544	0.00685357	1.86018
hsa-miR-378g	58.1817	141.836	92.9493	31.9017	55.5504	49.3142	0.62568	0.0636101	1.54294
hsa-miR-378h	5.19922	17.4687	14.0832	2.82004	8.20631	4.53063	0.763697	0.116141	1.69784
hsa-miR-378i	1409.24	1329.71	1486.1	485.046	720.893	968.161	0.574152	0.0882359	1.4888
hsa-miR-378j	4.45647	7.82183	6.71661	0.705009	3.57711	0.871275	1.46574	0.0158097	2.76206
hsa-miR-379-3p	0	0	0.86666	0	0	0.34851	0.76819	1	1.70313
hsa-miR-379-5p	21.5396	46.931	22.5332	25.3803	26.7231	29.7976	-0.324139	0.340895	0.798775
hsa-miR-380-3p	0	0	0	0.705009	0	0	-3.62467	0.441877	0.0810709
hsa-miR-380-5p	0.247582	0.521455	0	0.705009	0.631255	1.21979	-2.11208	0.100568	0.231314
hsa-miR-381-3p	80.9593	118.892	110.282	56.0482	59.5484	89.7414	0.157769	0.617738	1.11556
hsa-miR-382-3p	2.7234	1.56437	0.86666	0.528757	1.68335	1.21979	0.246495	0.789441	1.18632
hsa-miR-382-5p	2.22824	4.43237	2.38331	2.11503	0.841673	2.43957	0.24798	0.716374	1.18754
hsa-miR-3907	0	0	0.216665	0	0	0.174255	-0.0622027	1	0.957801
hsa-miR-3909	22.0348	62.5746	57.1995	22.7365	23.5668	26.4868	0.463599	0.182921	1.37898
hsa-miR-3911	3.96131	7.30037	4.76663	0.881261	4.41878	0.522765	1.03884	0.131232	2.05458
hsa-miR-3912-3p	0	1.30364	4.3333	1.76252	0	0.69702	0.593366	0.68807	1.50876
hsa-miR-3913-5p	3.96131	19.5546	11.6999	7.05009	13.4668	8.01573	-0.20922	0.643354	0.865005
hsa-miR-3916	0.742745	0.260728	0.86666	1.23377	0	0	0.108576	1	1.07816
hsa-miR-3917	3.46615	6.77892	4.3333	0.705009	3.15627	1.04553	1.14264	0.061616	2.20785
hsa-miR-3920	0	0	0	0	1.89376	0	-4.78996	0.150267	0.0361476
hsa-miR-3928-3p	17.3307	40.4128	29.4664	16.2152	19.1481	15.683	0.28974	0.399868	1.22242
hsa-miR-3929	0.495164	1.30364	4.11663	0.176252	0.210418	0.871275	1.71056	0.128316	3.27289
hsa-miR-3934-3p	0	1.04291	0	0.176252	0	0.174255	0.774786	0.829694	1.71094
hsa-miR-3934-5p	54.468	88.1259	53.9496	51.6419	78.2756	62.9061	-0.413494	0.201419	0.750803
hsa-miR-3935	0.990327	4.6931	2.16665	3.17254	5.68129	4.53063	-1.25316	0.0199493	0.419528
hsa-miR-3936	0	0	0.649995	0.176252	0	0.174255	0.352511	1	1.27678
hsa-miR-3939	1.23791	0.260728	1.08332	1.05751	0.210418	0.34851	0.25959	0.899482	1.19714
hsa-miR-3940-3p	38.8703	52.667	58.4995	29.2579	36.1919	34.5025	0.148492	0.646765	1.10841
hsa-miR-3940-5p	1.23791	3.38946	1.29999	2.29128	2.94586	2.26532	-0.816124	0.184927	0.567966
hsa-miR-3941	0.990327	0	0	0	0.210418	0	1.85595	0.601059	3.6199
hsa-miR-3942-3p	0.495164	0	0.649995	0	0.631255	0.522765	-0.272676	1	0.827783
hsa-miR-3942-5p	0	0.782183	0	0.352505	0.631255	1.04553	-1.83018	0.272119	0.28123
hsa-miR-3944-3p	21.0445	38.3269	30.3331	9.87013	16.623	9.40977	0.866834	0.0140307	1.82366
hsa-miR-3944-5p	2.47582	1.82509	3.6833	0.176252	0.841673	1.39404	1.32601	0.104235	2.50709
hsa-miR-409-3p	7.67504	19.8153	14.0832	10.7514	13.6772	8.71275	-0.15937	0.668744	0.895416
hsa-miR-409-5p	0.990327	0.521455	0	1.76252	0.420837	2.43957	-1.96043	0.0896421	0.256953
hsa-miR-410-3p	0.742745	0	0	0.352505	0	0	0.693232	0.871438	1.6169
hsa-miR-411-3p	0.247582	0.260728	0.649995	0	0.210418	0.522765	0.246807	1	1.18658
hsa-miR-411-5p	2.47582	3.38946	3.03331	3.52505	4.41878	3.31085	-0.771055	0.119675	0.585989
hsa-miR-412-5p	0	0.260728	0	0	0.210418	0.34851	-1.34563	0.749556	0.393483
hsa-miR-421	78.731	80.3041	103.783	99.4063	81.011	110.129	-0.567414	0.0824064	0.674825
hsa-miR-422a	65.3616	133.753	86.8826	37.013	62.4942	44.7836	0.524336	0.111199	1.43827
hsa-miR-423-3p	5982.07	8901.24	8118	5072.36	5840.79	5507.51	0.0397101	0.895297	1.02791
hsa-miR-423-5p	2750.14	3298.2	3287.02	2420.3	2552.79	2467.97	-0.102106	0.734652	0.931672
hsa-miR-424-3p	11.3888	14.8615	24.4831	14.4527	6.9438	19.1681	-0.130528	0.776753	0.913497
hsa-miR-424-5p	10.8936	17.7295	21.2332	12.8664	6.31255	13.7662	0.124745	0.75921	1.09031
hsa-miR-425-3p	216.386	359.022	325.214	125.668	159.918	194.817	0.460137	0.134803	1.37567
hsa-miR-425-5p	18456.2	13485.1	18002	14209.3	20874.8	10982.8	-0.266731	0.469941	0.831201
hsa-miR-4254	1.48549	0	0	0	0	0	4.38077	0.272484	20.8326
hsa-miR-4286	51.7446	230.744	173.115	36.6605	54.7088	74.4069	0.945935	0.0217598	1.92644
hsa-miR-429	1.48549	2.08582	0.43333	1.93877	0.841673	0.522765	-0.20943	0.854525	0.864879
hsa-miR-4301	0	0.260728	0.649995	0	0	0	3.39973	0.422472	10.5541
hsa-miR-4306	0	0	0	0	0	0.34851	-2.59033	0.695201	0.166047
hsa-miR-431-5p	0.247582	0	0.649995	0	0	0	3.48704	0.316163	11.2125
hsa-miR-432-5p	0	0.521455	0	0	0	0	2.57052	0.689163	5.94025
hsa-miR-4326	575.133	621.574	524.763	371.187	450.926	429.016	0.0526022	0.86668	1.03713
hsa-miR-4420	0	0.521455	0	0.176252	0.210418	0	-0.157947	1	0.8963
hsa-miR-4421	11.6363	20.076	22.3165	11.6326	14.3084	14.8117	-0.0464253	0.90652	0.968333
hsa-miR-4423-5p	0	0	0.43333	0	0	0.34851	-0.0786542	1	0.946941
hsa-miR-4424	0.990327	0.782183	0.216665	0.176252	2.3146	1.5683	-1.34334	0.224551	0.394107
hsa-miR-4425	60.1624	87.8652	116.999	60.6308	49.6587	80.8544	0.0196243	0.956989	1.0137
hsa-miR-4429	4.70405	9.64692	7.14994	2.11503	2.94586	2.43957	1.05416	0.0188199	2.07651
hsa-miR-4430	0	0.521455	0.216665	0	0	0.34851	0.448239	1	1.36437
hsa-miR-4431	1.23791	1.04291	1.51665	0.352505	0.420837	0.69702	0.925007	0.336297	1.89869
hsa-miR-4433b-3p	0	1.56437	0	0.881261	0.420837	0.34851	-0.710505	0.679963	0.611106
hsa-miR-4435	7.42745	8.60401	11.6999	3.7013	5.26046	4.87914	0.579116	0.147265	1.49393
hsa-miR-4440	5.19922	10.9506	5.84995	4.75881	2.10418	4.00787	0.51389	0.291234	1.4279
hsa-miR-4442	0	0	0.43333	0.352505	0	0.174255	-0.656021	1	0.634626
hsa-miR-4443	1.48549	4.17164	6.93328	0.705009	1.26251	2.09106	1.15743	0.0893516	2.2306
hsa-miR-4448	2.7234	9.90765	4.54996	1.05751	1.47293	0.522765	1.97124	0.00220884	3.92105
hsa-miR-4449	0	0	0.649995	0.176252	0	0	1.074	0.80509	2.10527
hsa-miR-4451	0	0.782183	0	0	0.420837	0	0.291469	1	1.22389
hsa-miR-4453	0	0.521455	0	0	0	0	2.57044	0.689638	5.93991
hsa-miR-4454	22.2824	85.7793	44.1997	28.3766	39.5586	40.2529	-0.0205859	0.958839	0.985832
hsa-miR-4455	0	0	0.43333	0.176252	0	0.522765	-0.967932	0.820706	0.511238
hsa-miR-4457	0	0.521455	0	0	0	0	2.57033	0.690264	5.93945
hsa-miR-4458	0.247582	2.60728	0.649995	0.176252	0	1.04553	0.910544	0.567038	1.87975
hsa-miR-4466	1.23791	4.43237	4.54996	0.881261	0.841673	0.871275	1.45986	0.0325462	2.75082
hsa-miR-4467	1.73307	0	1.94998	0.352505	1.26251	0.871275	0.271551	0.849193	1.20711
hsa-miR-4470	4.20889	13.2971	5.63329	5.64007	7.15422	5.57616	-0.166165	0.725814	0.891209
hsa-miR-4473	12.1315	17.9902	47.0163	16.744	17.4647	23.6987	-0.0437284	0.923426	0.970145
hsa-miR-4474-3p	0.495164	3.12873	0	1.58627	0.841673	1.39404	-0.653137	0.553309	0.635896
hsa-miR-4477a	0.495164	0	1.08332	0.176252	0	0.34851	1.09369	0.589272	2.13419
hsa-miR-4477b	4.70405	1.82509	3.03331	4.23005	3.99795	5.57616	-0.887305	0.10765	0.540623
hsa-miR-4478	0.247582	0.521455	1.08332	0	0	0	4.38509	0.0809641	20.895
hsa-miR-4479	1.98065	5.21455	3.6833	1.05751	1.05209	1.39404	1.13464	0.0587271	2.19563
hsa-miR-4483	0	0	0	0.352505	0	0	-2.73299	0.692907	0.150414
hsa-miR-4484	4.70405	10.1684	7.79994	0.881261	5.47088	5.40191	0.515684	0.349103	1.42967
hsa-miR-4485-3p	2.47582	2.60728	7.36661	3.7013	3.15627	2.43957	-0.0211857	1	0.985423
hsa-miR-4488	0	0	0.43333	0	0	0.174255	0.68633	1	1.60918
hsa-miR-4489	0.495164	1.82509	0.43333	0.176252	0.420837	1.04553	0.2384	0.894825	1.17968
hsa-miR-4492	0.247582	1.30364	0.43333	0	0	0	4.40835	0.0629006	21.2347
hsa-miR-4498	1.73307	4.6931	3.03331	0.705009	1.05209	0.34851	1.67049	0.0276073	3.18323
hsa-miR-449a	0.742745	4.6931	0.86666	0.705009	1.05209	2.43957	0.0509722	1	1.03596
hsa-miR-449b-5p	0.495164	2.08582	2.59998	1.93877	0	1.21979	0.150756	0.938305	1.11015
hsa-miR-449c-5p	9.40811	14.34	7.36661	15.3339	10.1001	16.2057	-0.877131	0.0246828	0.544449
hsa-miR-4502	1.73307	5.21455	1.29999	0.528757	1.47293	1.74255	0.65199	0.396906	1.57133
hsa-miR-4504	5.94196	15.3829	13.2166	8.81261	14.3084	8.01573	-0.325477	0.394356	0.798034
hsa-miR-4506	0	0	0	0	0	0.34851	-2.59044	0.694701	0.166035
hsa-miR-4507	0.495164	0.782183	0	0.352505	0	0	1.15878	0.676503	2.23268
hsa-miR-4508	0.247582	1.30364	1.08332	0	0	0.174255	2.95	0.0933121	7.72747
hsa-miR-450a-1-3p	0	1.30364	1.08332	0.352505	0.210418	1.21979	-0.108887	1	0.927303
hsa-miR-450a-2-3p	1.73307	1.56437	1.94998	1.41002	2.3146	0.871275	-0.207931	0.858916	0.865778
hsa-miR-450a-5p	16.3404	24.7691	42.8997	40.0093	24.6189	54.0191	-0.958319	0.0195014	0.514656
hsa-miR-450b-3p	0	0	1.08332	0	0	0	3.64992	0.421298	12.5527
hsa-miR-450b-5p	17.0831	21.6404	53.5162	52.3469	21.2522	50.7082	-0.902634	0.0557518	0.534909
hsa-miR-4510	1.98065	4.17164	4.11663	0.528757	0.210418	1.5683	1.63617	0.0281549	3.10839
hsa-miR-4511	0.495164	1.30364	0.86666	0.881261	0.210418	1.21979	-0.292782	0.794244	0.816326
hsa-miR-4512	0.495164	0.260728	0	0.176252	0.210418	0.34851	-0.320887	1	0.800577
hsa-miR-4515	2.97098	9.12546	3.46664	1.93877	5.05004	2.43957	0.246661	0.700343	1.18646
hsa-miR-4517	2.97098	0	1.08332	1.05751	0.631255	1.04553	0.293892	0.809677	1.22594
hsa-miR-4519	0.247582	0.782183	0	0	0	0	3.53262	0.317166	11.5724
hsa-miR-451a	76.5028	485.996	210.815	83.1911	83.1152	157.004	0.711682	0.124413	1.63771
hsa-miR-452-5p	9.65569	7.5611	11.6999	2.46753	3.36669	4.18212	1.13011	0.00951004	2.18876
hsa-miR-4521	504.324	226.833	312.864	249.397	101.001	217.993	0.526669	0.255525	1.4406
hsa-miR-4522	0.495164	0.782183	0	0.881261	0.631255	1.5683	-1.687	0.138566	0.310572
hsa-miR-4523	0.247582	0.260728	0.86666	0	0.420837	0.174255	0.791419	0.670034	1.73078
hsa-miR-4526	0.247582	1.30364	0.86666	0.705009	0.210418	0.69702	0.0445423	1	1.03136
hsa-miR-4527	3.46615	3.38946	4.76663	2.64378	1.26251	2.43957	0.423903	0.435228	1.34155
hsa-miR-454-3p	69.0753	52.9277	68.8995	152.282	62.2838	116.228	-1.20859	0.00310374	0.432692
hsa-miR-454-5p	6.93229	8.08255	21.0165	10.0464	8.41673	13.0691	-0.251157	0.578824	0.840222
hsa-miR-455-3p	34.6615	51.1026	41.383	42.653	44.3983	43.5638	-0.485659	0.120891	0.714171
hsa-miR-455-5p	323.589	730.558	360.964	518.358	349.926	516.318	-0.461108	0.187953	0.726428
hsa-miR-4635	0	0.521455	0	0	0.210418	0.522765	-0.933536	0.821661	0.523574
hsa-miR-4636	7.17987	11.472	11.2666	13.9239	12.6251	13.5919	-0.879426	0.0104262	0.543584
hsa-miR-4637	0	0.260728	0.216665	1.05751	0	0.174255	-1.78296	0.457517	0.290587
hsa-miR-4638-3p	1.48549	3.38946	2.16665	1.58627	1.68335	2.96234	-0.291112	0.691111	0.817272
hsa-miR-4638-5p	0	0	0.43333	0.176252	0.210418	0.522765	-1.27944	0.628169	0.411955
hsa-miR-4639-5p	0	0.782183	3.46664	0.352505	0	0.871275	1.2335	0.438466	2.35137
hsa-miR-4640-3p	0	0.782183	0.86666	1.93877	0.210418	0	-0.976747	0.533443	0.508124
hsa-miR-4640-5p	2.97098	0.782183	2.38331	0.352505	0.631255	1.5683	0.922474	0.315014	1.89536
hsa-miR-4641	0	0	0	0.176252	0	0.174255	-2.67128	0.603274	0.156987
hsa-miR-4642	0	0	1.94998	0	0	0.871275	0.688541	0.835695	1.61165
hsa-miR-4644	0.742745	0	1.94998	0.176252	0.210418	0	2.24731	0.216151	4.74796
hsa-miR-4645-3p	1.48549	1.82509	1.73332	1.76252	2.52502	1.91681	-0.715896	0.237365	0.608827
hsa-miR-4646-3p	0	0	0	0	0.210418	0.34851	-3.16605	0.414384	0.11141
hsa-miR-4646-5p	0	0.521455	0.216665	1.76252	1.05209	0.34851	-2.51695	0.061088	0.174712
hsa-miR-4647	3.21856	10.6898	4.11663	3.17254	3.15627	2.09106	0.580419	0.278417	1.49528
hsa-miR-4648	0.247582	1.56437	0.649995	0.176252	0.841673	0.174255	0.546202	0.752428	1.46024
hsa-miR-4649-5p	0	1.30364	1.08332	0.528757	0.631255	0	0.465114	0.783288	1.38043
hsa-miR-4651	0	0.260728	0	0.352505	0.631255	0	-2.12453	0.455493	0.229325
hsa-miR-4653-3p	0	1.04291	0	0.176252	0	1.04553	-0.785018	0.784808	0.580345
hsa-miR-4653-5p	0	0.782183	0	0	0.210418	0	1.10691	0.808466	2.15385
hsa-miR-4654	0.990327	0.521455	1.73332	1.05751	1.68335	0.871275	-0.524862	0.598741	0.695026
hsa-miR-4655-3p	0	0	0	0.352505	0	0	-2.73298	0.692822	0.150415
hsa-miR-4655-5p	0.495164	0.260728	0	0.176252	1.26251	0.522765	-1.61167	0.318484	0.32722
hsa-miR-4657	0.247582	3.12873	1.51665	0.352505	0.631255	0.34851	1.30418	0.225966	2.46943
hsa-miR-4658	0	0.260728	0.216665	0.528757	0	0.174255	-1.00877	0.80001	0.496971
hsa-miR-4659a-3p	2.7234	3.12873	2.16665	3.52505	2.3146	1.04553	-0.236597	0.74702	0.848745
hsa-miR-4659b-3p	0	0	0.649995	0	0	0	2.99746	0.538451	7.98595
hsa-miR-466	2.47582	0	0.86666	0.352505	0.210418	0.174255	1.82453	0.200861	3.54192
hsa-miR-4660	3.46615	4.43237	1.94998	3.7013	4.6292	2.61383	-0.587514	0.280358	0.665488
hsa-miR-4661-5p	23.0251	39.8913	49.6163	14.8052	28.8273	24.2215	0.28524	0.423225	1.21861
hsa-miR-4664-3p	70.0657	212.232	164.882	34.8979	54.7088	45.4806	1.2307	0.000546284	2.34681
hsa-miR-4664-5p	0.990327	7.5611	4.3333	0.352505	0.631255	2.26532	1.44088	0.0652008	2.71487
hsa-miR-4665-3p	0	0	0	0	0	0.34851	-2.59055	0.694254	0.166023
hsa-miR-4665-5p	6.93229	8.08255	9.09993	3.87755	5.47088	2.96234	0.545146	0.206172	1.45917
hsa-miR-4666a-5p	0	0	0.43333	0	0	0	2.51209	0.689332	5.70444
hsa-miR-4667-3p	0	0	1.51665	0	0	0	4.09868	0.27005	17.1326
hsa-miR-4667-5p	0.742745	0	0.649995	0	0.210418	0.34851	0.958561	0.697417	1.94337
hsa-miR-4668-5p	0.495164	1.04291	1.73332	1.05751	0	0.34851	0.648892	0.630898	1.56796
hsa-miR-4669	1.23791	1.82509	2.38331	1.05751	0.841673	0.522765	0.699488	0.37811	1.62393
hsa-miR-4671-3p	0	0	0	0.528757	0	0	-3.2466	0.540798	0.10536
hsa-miR-4671-5p	0.495164	0.521455	1.51665	0	0.210418	0.34851	1.66658	0.290831	3.1746
hsa-miR-4672	0	0	0.649995	0	0	0.34851	0.407234	1	1.32614
hsa-miR-4674	0.247582	0	0.649995	0.881261	0.210418	0.174255	-0.868192	0.725452	0.547833
hsa-miR-4676-3p	0.495164	0	1.51665	0.528757	0.631255	1.74255	-0.861133	0.430454	0.55052
hsa-miR-4676-5p	0.247582	0	0.216665	0.352505	2.10418	0.174255	-2.59815	0.11351	0.165151
hsa-miR-4677-3p	71.3036	95.687	77.5661	63.8033	67.7547	67.7852	-0.141146	0.646468	0.906799
hsa-miR-4677-5p	15.5977	20.3367	16.4665	6.52133	11.9938	6.44744	0.648486	0.0879626	1.56752
hsa-miR-4679	1.23791	0.260728	0	0.352505	0.210418	1.91681	-0.953714	0.589061	0.516302
hsa-miR-4680-5p	0.742745	0.260728	0	0	0	0.174255	1.85332	0.48573	3.61332
hsa-miR-4682	1.48549	1.04291	1.08332	0	0	2.43957	0.219849	0.936232	1.16461
hsa-miR-4683	5.69438	6.51819	2.38331	5.99258	5.89171	6.62169	-0.768465	0.113865	0.587042
hsa-miR-4685-3p	0.742745	2.08582	0.216665	1.05751	1.89376	0.522765	-0.66882	0.550518	0.629021
hsa-miR-4685-5p	0	0	0	0	0	0.522765	-3.08505	0.535749	0.117844
hsa-miR-4687-3p	2.97098	4.6931	3.03331	0.705009	1.68335	1.21979	1.12866	0.0596387	2.18656
hsa-miR-4687-5p	0	1.56437	0	0	0	0	3.96776	0.340566	15.6464
hsa-miR-4688	0	0	1.94998	0.705009	1.05209	0.34851	-0.530044	0.753554	0.692534
hsa-miR-4689	0	1.04291	0	0.528757	0.210418	0	-0.185443	1	0.879379
hsa-miR-4690-3p	1.98065	1.56437	0.649995	0.176252	0.631255	0.34851	1.45528	0.161974	2.74211
hsa-miR-4690-5p	0.990327	1.56437	1.08332	0	0	0	5.32973	0.00468428	40.2169
hsa-miR-4691-3p	0	0	0	0	1.47293	0.522765	-4.86197	0.0718271	0.0343875
hsa-miR-4691-5p	0	0.521455	0	0.176252	0	0.522765	-0.921439	0.82124	0.527982
hsa-miR-4695-3p	0.990327	1.56437	1.51665	0	0	0	5.4892	0.00278155	44.9173
hsa-miR-4695-5p	0.247582	0	0.86666	0	0	0	3.75962	0.245364	13.5443
hsa-miR-4698	0.495164	0	0	0.176252	0	0	0.956464	1	1.94055
hsa-miR-4699-3p	0.742745	0	0	0.176252	0.841673	0	-0.572774	1	0.672323
hsa-miR-4699-5p	0	0.260728	0.216665	0.176252	0	0	0.647678	1	1.56664
hsa-miR-4700-3p	0	0	0.216665	0	0	0.174255	-0.0621798	1	0.957816
hsa-miR-4700-5p	0.495164	0.521455	1.51665	0	0.631255	0	1.57512	0.348904	2.97961
hsa-miR-4705	0.495164	0.521455	0	0	0	0	3.61615	0.307611	12.2622
hsa-miR-4706	2.7234	1.04291	3.6833	4.58256	4.41878	2.26532	-0.980845	0.121921	0.506683
hsa-miR-4707-3p	8.1702	31.2873	20.5832	4.40631	9.88966	4.70489	1.15958	0.011523	2.23393
hsa-miR-4707-5p	0.742745	0.521455	0.216665	0.528757	0.210418	0.174255	0.24046	1	1.18137
hsa-miR-4709-3p	0	0	0	0	0.210418	0.522765	-3.51927	0.317799	0.0872157
hsa-miR-4709-5p	0	0.782183	0	0	0	0	3.06498	0.534392	8.36854
hsa-miR-4714-3p	0	0.782183	0	0.352505	0	0	0.335388	1	1.26172
hsa-miR-4714-5p	0.247582	0	0	0.176252	0	0	0.0954716	1	1.06841
hsa-miR-4716-3p	0	0	0	0	0.631255	0	-3.29818	0.550249	0.10166
hsa-miR-4717-3p	0	0	0	0.176252	1.89376	0	-4.92761	0.0822977	0.032858
hsa-miR-4721	0.495164	1.56437	0	0.352505	0	0.174255	1.27277	0.50997	2.41624
hsa-miR-4723-3p	0.495164	0.782183	0.649995	0.881261	2.3146	0.174255	-1.19309	0.320406	0.437366
hsa-miR-4723-5p	0	0.260728	0.216665	0.176252	0.631255	0.522765	-1.73857	0.351799	0.299666
hsa-miR-4724-5p	0	1.56437	0	0.705009	0.420837	1.74255	-1.43329	0.263597	0.370286
hsa-miR-4725-3p	1.23791	4.43237	2.59998	1.05751	2.10418	1.74255	0.273158	0.686752	1.20845
hsa-miR-4725-5p	0.495164	0.521455	0	0	0	0.174255	1.76091	0.577241	3.38912
hsa-miR-4726-5p	1.98065	3.38946	3.89997	0.881261	1.05209	1.5683	0.941099	0.13755	1.91999
hsa-miR-4727-3p	0.742745	1.82509	0	0.705009	0	0.174255	0.91254	0.613396	1.88236
hsa-miR-4727-5p	0	0	0.86666	0	0	0	3.36022	0.53008	10.269
hsa-miR-4728-3p	1.73307	1.56437	1.51665	0.176252	0.420837	0.871275	1.27212	0.17555	2.41517
hsa-miR-4728-5p	0.247582	0.260728	1.51665	1.41002	0	0.34851	-0.309603	0.907269	0.806864
hsa-miR-4730	6.68471	6.25746	11.2666	2.64378	5.47088	2.61383	0.771912	0.109351	1.70753
hsa-miR-4731-3p	1.73307	0.782183	0	0.881261	0.210418	0.174255	0.585689	0.72475	1.50076
hsa-miR-4731-5p	0.742745	2.34655	2.38331	1.23377	1.89376	2.78808	-0.564776	0.396935	0.67606
hsa-miR-4733-3p	0	0.260728	0.216665	0	0	0	2.57129	0.594047	5.9434
hsa-miR-4733-5p	0.247582	0.782183	0.216665	0	0.420837	0.522765	-0.0500777	1	0.965884
hsa-miR-4734	0	1.82509	0	0.528757	0.841673	1.04553	-0.975825	0.473663	0.508449
hsa-miR-4735-3p	0	0	0	0.352505	0	0	-2.73295	0.692473	0.150418
hsa-miR-4738-3p	1.73307	1.56437	4.76663	1.05751	0.841673	0.34851	1.37781	0.112475	2.59873
hsa-miR-4739	0	1.04291	0.86666	0	0	0	4.33583	0.11697	20.1936
hsa-miR-4740-5p	1.73307	3.38946	0	0.176252	0.841673	0	1.85447	0.181398	3.6162
hsa-miR-4741	4.70405	5.73601	5.84995	6.69759	10.3105	4.35638	-0.816098	0.0682281	0.567976
hsa-miR-4742-3p	2.22824	2.34655	0.86666	1.41002	0	1.04553	0.663851	0.509039	1.58431
hsa-miR-4742-5p	0.247582	0	1.08332	0.176252	3.36669	0.174255	-1.74675	0.203059	0.297972
hsa-miR-4743-5p	0.247582	1.04291	0	0.176252	1.26251	0	-0.610193	0.79402	0.655109
hsa-miR-4744	0.247582	0	0.216665	0	2.10418	0.34851	-2.46905	0.181973	0.18061
hsa-miR-4745-3p	1.23791	5.47528	4.11663	0.705009	3.57711	2.26532	0.258362	0.768697	1.19612
hsa-miR-4745-5p	5.69438	20.3367	8.23327	4.93506	5.47088	6.27318	0.52505	0.241777	1.43898
hsa-miR-4746-3p	1.48549	0.521455	0	0	0	0.69702	1.19847	0.62873	2.29496
hsa-miR-4746-5p	38.6228	101.684	61.0995	49.3506	73.2256	49.4884	-0.263076	0.445013	0.83331
hsa-miR-4747-3p	0	2.60728	1.29999	0	0	0	5.29739	0.0228365	39.3254
hsa-miR-4748	1.48549	1.30364	0.86666	0.176252	1.05209	0	1.19839	0.411352	2.29483
hsa-miR-4749-5p	0.247582	0.782183	0	0.176252	0.210418	0	0.794829	0.797432	1.73487
hsa-miR-4750-5p	0.742745	3.65019	0	0.528757	0.420837	0	1.56282	0.291294	2.95431
hsa-miR-4752	0	0.260728	0	0	0	0.174255	-0.0250087	1	0.982815
hsa-miR-4753-3p	0	0	0	0	0.420837	0.174255	-3.22388	0.422031	0.107033
hsa-miR-4753-5p	0.742745	1.04291	0	0	0	0.69702	0.883446	0.775883	1.84478
hsa-miR-4754	0.990327	0	1.51665	0.176252	0.210418	0.34851	1.34987	0.375909	2.54889
hsa-miR-4755-3p	0.247582	0.260728	0	0.528757	0.841673	0.69702	-2.29059	0.120012	0.204391
hsa-miR-4755-5p	1.48549	2.60728	5.41662	0.528757	0	1.04553	2.04844	0.0213048	4.13658
hsa-miR-4757-3p	0	0	0	0.352505	0	0	-2.73288	0.691475	0.150425
hsa-miR-4758-3p	0.742745	3.91091	3.03331	0.705009	0.420837	0.34851	1.80084	0.0402519	3.48424
hsa-miR-4758-5p	0	0.782183	0	0	0.210418	0	1.10674	0.808834	2.15358
hsa-miR-4761-3p	0	0.521455	0	0	0.210418	0.34851	-0.578628	1	0.6696
hsa-miR-4761-5p	0	1.04291	0	0	0	0	3.43228	0.431261	10.7949
hsa-miR-4762-3p	2.47582	2.60728	3.46664	2.29128	3.78753	2.26532	-0.372244	0.533598	0.77258
hsa-miR-4762-5p	0	0.260728	1.73332	0	0.210418	1.21979	0.0442759	1	1.03117
hsa-miR-4763-3p	1.23791	2.60728	0	0	0	0.34851	2.75435	0.126286	6.74751
hsa-miR-4763-5p	1.23791	0.260728	1.08332	0.176252	1.68335	1.21979	-0.537139	0.67313	0.689136
hsa-miR-4764-5p	0.247582	1.04291	2.16665	0.176252	1.05209	0.522765	0.538875	0.708985	1.45284
hsa-miR-4765	0	0	0.86666	0.352505	0	0	0.632504	1	1.55025
hsa-miR-4766-3p	0	2.868	1.94998	2.46753	1.26251	3.4851	-1.12167	0.142333	0.459562
hsa-miR-4766-5p	0.742745	0.521455	4.3333	1.58627	1.05209	0.522765	0.357101	0.762028	1.28085
hsa-miR-4767	0.247582	0.782183	1.29999	0.352505	0	0.174255	1.48684	0.358735	2.80275
hsa-miR-4768-3p	0	0	0	0.352505	0	0	-2.73286	0.691101	0.150428
hsa-miR-4768-5p	0.247582	0	0.649995	0.881261	0.210418	0.522765	-1.18352	0.505081	0.440275
hsa-miR-4769-3p	0	0	1.08332	0	0	0.174255	1.82011	0.660858	3.53108
hsa-miR-4773	0	0	0	0	0.210418	0.34851	-3.16605	0.414403	0.11141
hsa-miR-4774-5p	0	0.521455	0	0	0	0	2.57022	0.690881	5.93901
hsa-miR-4775	0.495164	0	1.08332	0.881261	0	1.21979	-0.774242	0.649316	0.584696
hsa-miR-4777-3p	0	0	0.43333	0	0	0.174255	0.68635	1	1.60921
hsa-miR-4779	0.495164	0	0	0.352505	0	0.174255	-0.350677	1	0.784216
hsa-miR-4780	0	0.260728	0.86666	0.176252	0.841673	0	-0.258766	1	0.835803
hsa-miR-4781-3p	2.7234	3.38946	4.3333	2.29128	2.52502	4.00787	-0.185971	0.745155	0.879057
hsa-miR-4781-5p	0	0	1.51665	0	0	0	4.0988	0.26905	17.1341
hsa-miR-4782-5p	0	0.521455	0.43333	0	1.05209	0	-0.553998	0.859265	0.68113
hsa-miR-4783-3p	0.247582	0.782183	0	0	0	0.522765	0.427996	1	1.34536
hsa-miR-4784	0.247582	0	0	0.176252	0	0.174255	-0.695404	1	0.617536
hsa-miR-4785	2.7234	8.60401	8.0166	2.64378	5.47088	2.26532	0.42399	0.428125	1.34163
hsa-miR-4786-3p	0.247582	0	0	0.176252	0	0.34851	-1.174	0.752844	0.443192
hsa-miR-4786-5p	4.20889	9.64692	2.59998	2.99629	6.31255	4.18212	-0.175988	0.773115	0.885161
hsa-miR-4787-3p	0.990327	4.17164	0.86666	0.881261	0.631255	1.5683	0.425317	0.657612	1.34287
hsa-miR-4788	0.742745	1.82509	0.216665	0.528757	0	0	1.68112	0.319748	3.20678
hsa-miR-4791	1.98065	2.08582	5.19996	1.76252	2.10418	2.43957	0.132389	0.835783	1.09611
hsa-miR-4793-3p	0.247582	0.782183	0	0.176252	0.841673	0	-0.422059	1	0.746359
hsa-miR-4794	0	0.260728	0	0.176252	0	1.74255	-3.01799	0.189646	0.123451
hsa-miR-4796-5p	0	0	0	0.176252	0	0.174255	-2.67137	0.602585	0.156978
hsa-miR-4797-3p	3.21856	1.30364	1.94998	2.46753	1.89376	2.26532	-0.407836	0.56982	0.753753
hsa-miR-4797-5p	0	3.38946	0.43333	0.176252	0.210418	0	2.49194	0.162794	5.62532
hsa-miR-4799-5p	0.247582	3.12873	0.43333	0	0	0.174255	3.39273	0.0585309	10.503
hsa-miR-4802-3p	0.990327	1.04291	1.29999	0.352505	0.420837	0.69702	0.729681	0.47368	1.65827
hsa-miR-4802-5p	0.495164	0	0	0	0	0.174255	1.05605	1	2.07924
hsa-miR-4803	0	0	0.86666	0	0	0.174255	1.53271	0.799993	2.89329
hsa-miR-4804-3p	0	0.782183	0	0	0.210418	0.34851	-0.0854881	1	0.942466
hsa-miR-4804-5p	2.7234	7.30037	3.89997	0.881261	1.26251	0.522765	1.8858	0.00411196	3.69558
hsa-miR-483-3p	0	0.260728	0.86666	0.705009	0.420837	0	-0.48216	0.863145	0.715905
hsa-miR-483-5p	0	0	0	0	0.420837	0	-2.77853	0.699458	0.14574
hsa-miR-484	251.791	409.603	531.046	398.506	327.832	617.734	-0.628833	0.0721884	0.646699
hsa-miR-485-3p	0	0	0	0.176252	0	0.34851	-3.15249	0.411963	0.112462
hsa-miR-485-5p	0.247582	0.782183	1.51665	0.705009	0	0.871275	0.173166	1	1.12753
hsa-miR-486-3p	0	0.260728	0.216665	0	0.841673	0	-1.11127	0.833019	0.462886
hsa-miR-486-5p	17.0831	55.2742	29.0331	13.0427	24.8294	13.4176	0.484771	0.224928	1.39936
hsa-miR-487a-3p	0.495164	0.260728	0	0.176252	0.631255	0.34851	-0.897124	0.662755	0.536956
hsa-miR-487b-3p	0.742745	1.30364	1.94998	1.05751	1.47293	0	0.200846	0.922423	1.14937
hsa-miR-489-3p	0.247582	0.521455	0	0	0	0.522765	0.0804951	1	1.05738
hsa-miR-490-3p	1.73307	1.30364	2.16665	2.11503	0.841673	1.39404	-0.179713	0.929927	0.882878
hsa-miR-490-5p	0	0	0	0.528757	0.420837	0.174255	-4.15316	0.117491	0.0562049
hsa-miR-491-3p	0.495164	1.30364	0	2.11503	0.210418	1.21979	-1.49756	0.227031	0.354152
hsa-miR-491-5p	79.9689	112.634	60.2329	25.7328	54.2879	24.7442	0.850429	0.029123	1.80304
hsa-miR-493-3p	1.23791	2.08582	0.649995	0.881261	1.89376	1.21979	-0.441078	0.617607	0.736584
hsa-miR-493-5p	0.495164	0.260728	0	0.352505	0.420837	0.522765	-1.09455	0.524415	0.468282
hsa-miR-494-3p	2.97098	0.260728	2.16665	2.99629	1.89376	3.4851	-0.955392	0.219148	0.515701
hsa-miR-495-3p	2.22824	4.6931	1.73332	2.46753	2.73544	3.4851	-0.476168	0.420908	0.718885
hsa-miR-497-5p	10.8936	15.1222	9.96659	8.63636	4.6292	10.1068	0.169051	0.676837	1.12432
hsa-miR-498-3p	0.495164	0.782183	0	0.881261	0.210418	0.522765	-0.811203	0.636154	0.569906
hsa-miR-498-5p	6.18955	5.47528	7.36661	9.87013	10.1001	13.7662	-1.23317	0.00156921	0.425383
hsa-miR-4999-5p	0.495164	0.782183	0.216665	0.352505	0.420837	0	0.462286	0.840476	1.37772
hsa-miR-499a-5p	2.7234	3.12873	4.76663	2.82004	0.631255	4.18212	0.0239625	1	1.01675
hsa-miR-499b-5p	0	0	0	0	0	0.522765	-3.08513	0.535107	0.117837
hsa-miR-5000-3p	3.21856	7.03964	4.3333	1.93877	1.47293	1.91681	0.9588	0.065963	1.94369
hsa-miR-5000-5p	0	0.521455	0	0.176252	0	0.174255	-0.0838594	1	0.94353
hsa-miR-5001-3p	7.92262	13.5578	17.9832	10.9276	8.20631	13.7662	-0.200513	0.618865	0.870241
hsa-miR-5001-5p	0.495164	12.7756	2.81664	1.58627	3.36669	2.61383	0.501484	0.532169	1.41567
hsa-miR-5002-5p	0.495164	0	0	0	0	0	2.89522	0.707378	7.43956
hsa-miR-5004-3p	0.247582	0.260728	0	1.41002	1.26251	0.34851	-2.85585	0.0358313	0.138135
hsa-miR-5004-5p	0	0	0	0.176252	0	0.34851	-3.15245	0.41226	0.112465
hsa-miR-5006-3p	0.990327	1.30364	1.51665	0	0.420837	1.91681	0.29574	0.840239	1.22751
hsa-miR-5006-5p	0	1.30364	0	0	0.841673	0	0.0543716	1	1.03841
hsa-miR-5008-3p	0	0	0	0.352505	0	0	-2.73285	0.691004	0.150428
hsa-miR-5009-3p	0.495164	0	0	0	0	0	2.89516	0.707249	7.43925
hsa-miR-5009-5p	5.19922	5.21455	4.76663	4.93506	2.73544	4.70489	-0.144148	0.771154	0.904913
hsa-miR-500a-3p	510.514	632.264	602.762	432.347	550.454	521.197	-0.209228	0.489721	0.865
hsa-miR-500a-5p	176.278	95.1655	77.7827	259.091	218.414	180.354	-1.25834	0.00361021	0.418024
hsa-miR-501-3p	271.102	317.566	343.631	235.121	303.634	262.08	-0.203835	0.504136	0.86824
hsa-miR-501-5p	143.845	119.152	116.782	119.852	147.924	113.963	-0.394307	0.246442	0.760855
hsa-miR-5010-3p	47.7833	38.0662	44.633	33.4879	28.196	43.2153	-0.075866	0.84578	0.948772
hsa-miR-5010-5p	0.742745	0	0	0.881261	0	0	-0.509174	1	0.702625
hsa-miR-502-3p	237.431	345.725	336.697	173.608	184.747	208.758	0.253362	0.396898	1.19198
hsa-miR-502-5p	8.91295	9.12546	3.46664	17.449	13.8876	15.683	-1.54628	0.000473287	0.342391
hsa-miR-503-3p	1.73307	2.60728	1.29999	0.176252	1.26251	0.69702	0.982626	0.249287	1.97606
hsa-miR-503-5p	43.0792	83.9543	104.866	42.4768	41.0316	63.2546	0.191187	0.587126	1.1417
hsa-miR-504-3p	0.495164	1.04291	2.59998	1.05751	0.631255	0.34851	0.526439	0.647414	1.44037
hsa-miR-504-5p	132.209	234.133	161.849	137.477	154.657	152.996	-0.212474	0.486702	0.863056
hsa-miR-505-3p	68.085	55.535	60.2329	40.538	44.3983	35.3738	0.217539	0.531304	1.16275
hsa-miR-505-5p	1.98065	3.38946	0.649995	1.58627	2.52502	0.34851	-0.0223439	1	0.984632
hsa-miR-506-3p	0	0.260728	0	0.528757	0.210418	0.871275	-2.81037	0.127296	0.142559
hsa-miR-508-3p	0	0	0	1.41002	0.420837	1.21979	-5.55401	0.00364046	0.0212851
hsa-miR-5088-3p	0	0	0	0	1.26251	0.174255	-4.40312	0.162884	0.0472639
hsa-miR-5088-5p	0	0.260728	0.649995	0.176252	1.05209	0.174255	-0.963615	0.569264	0.51277
hsa-miR-509-3-5p	0.247582	2.60728	4.11663	5.28757	3.99795	5.57616	-1.5742	0.00669839	0.335828
hsa-miR-509-3p	0	1.04291	0.216665	1.93877	0.631255	2.96234	-2.61579	0.0102225	0.163144
hsa-miR-509-5p	0.247582	0.260728	0	0	0.631255	0.34851	-1.18916	0.637752	0.438557
hsa-miR-5090	0.990327	4.17164	1.94998	0.352505	3.15627	0.174255	0.479129	0.697873	1.3939
hsa-miR-5091	3.21856	9.64692	7.79994	1.76252	2.10418	2.43957	1.21753	0.0132395	2.32548
hsa-miR-5093	0	0	0	0	1.26251	0.174255	-4.40305	0.16197	0.0472663
hsa-miR-5094	2.47582	2.34655	5.41662	3.52505	1.05209	4.00787	-0.19219	0.792273	0.875276
hsa-miR-5100	47.2881	243.78	126.316	33.3117	40.1899	46.1776	1.26427	0.00225903	2.40205
hsa-miR-511-3p	0.990327	2.868	1.29999	1.93877	2.52502	2.78808	-0.960485	0.131265	0.513884
hsa-miR-511-5p	2.7234	8.08255	12.1332	8.81261	6.73338	7.14446	-0.479843	0.303714	0.717056
hsa-miR-512-3p	179.002	326.692	256.531	130.427	144.557	193.772	0.244681	0.43136	1.18483
hsa-miR-512-5p	0.742745	1.04291	2.16665	2.64378	1.68335	1.91681	-1.09164	0.11614	0.469229
hsa-miR-514a-3p	14.8549	43.02	40.733	58.3395	47.1337	75.6267	-1.37528	0.000234776	0.385477
hsa-miR-514a-5p	0	0	0	0	0	0.522765	-3.08518	0.534769	0.117833
hsa-miR-514b-3p	0	0	0.43333	1.23377	0.210418	0.34851	-2.28137	0.237332	0.205702
hsa-miR-515-3p	2.47582	5.21455	0.649995	0.705009	1.26251	1.5683	0.764958	0.343126	1.69932
hsa-miR-515-5p	9.65569	5.47528	6.28328	17.9777	10.7313	14.2889	-1.39275	0.00200955	0.380837
hsa-miR-516a-5p	60.9051	52.9277	50.6996	66.6234	51.5525	71.9673	-0.607765	0.0809451	0.656212
hsa-miR-516b-5p	502.591	468.267	461.496	400.798	457.87	344.851	-0.152493	0.643469	0.899694
hsa-miR-517-5p	0.742745	0.521455	1.73332	0.528757	2.52502	1.04553	-0.796349	0.379718	0.575805
hsa-miR-517a-3p	47.2881	92.2975	62.1828	60.2783	44.1878	82.7712	-0.361486	0.290843	0.778363
hsa-miR-517b-3p	47.2881	92.2975	62.1828	60.2783	44.1878	82.7712	-0.361486	0.290467	0.778362
hsa-miR-517c-3p	8.41778	13.0364	9.74992	11.4564	10.3105	15.3344	-0.698422	0.0496139	0.616246
hsa-miR-5187-3p	1.73307	1.82509	0.43333	1.93877	1.26251	0.34851	-0.278368	0.864573	0.824523
hsa-miR-5187-5p	0.990327	1.82509	4.98329	1.23377	2.94586	3.31085	-0.361172	0.620323	0.778532
hsa-miR-5188	0.495164	0	0	0.528757	0	0.522765	-1.26271	0.565004	0.416761
hsa-miR-5189-3p	0	0	0	0.528757	0	0	-3.24661	0.541067	0.105359
hsa-miR-5189-5p	0	0	1.29999	0.352505	1.05209	0	-0.50799	0.810857	0.703202
hsa-miR-518a-3p	66.3519	107.42	82.116	36.4842	66.913	34.154	0.451273	0.194486	1.36725
hsa-miR-518a-5p	1.98065	11.2113	0	0.352505	0.631255	0.69702	2.37307	0.0325037	5.18044
hsa-miR-518b	47.2881	72.743	60.2329	66.6234	69.0172	71.6188	-0.651348	0.0322128	0.636685
hsa-miR-518c-3p	23.5203	61.7924	34.8831	23.6178	22.3043	32.0629	0.132535	0.706706	1.09622
hsa-miR-518c-5p	24.263	21.3797	16.4665	19.564	20.8314	18.2968	-0.315712	0.394727	0.803454
hsa-miR-518d-3p	0.990327	1.56437	0.43333	0.352505	1.68335	0.871275	-0.365756	0.817308	0.776062
hsa-miR-518d-5p	26.4913	30.2444	33.5831	28.2004	29.669	28.9263	-0.370665	0.238968	0.773426
hsa-miR-518e-3p	64.8664	136.1	112.882	29.7866	69.8589	53.8448	0.57774	0.0997921	1.49251
hsa-miR-518e-5p	55.9535	117.327	81.466	55.167	66.2818	85.7335	-0.167582	0.601199	0.890334
hsa-miR-518f-3p	20.0541	39.6306	33.3664	19.564	35.7711	20.5621	-0.16494	0.634492	0.891965
hsa-miR-518f-5p	18.0735	27.1157	28.5998	23.2653	27.7752	23.6987	-0.465982	0.140422	0.723978
hsa-miR-5193	0	0	0	0.176252	0	0.69702	-3.79192	0.241789	0.0721969
hsa-miR-5194	0	0	0	0	0	0.34851	-2.59062	0.69391	0.166014
hsa-miR-519a-2-5p	8.66536	4.95382	11.2666	5.11132	5.26046	6.79595	0.148235	0.76835	1.10821
hsa-miR-519a-3p	2.97098	7.03964	4.11663	4.58256	5.68129	10.281	-1.00066	0.0287988	0.499771
hsa-miR-519a-5p	63.6285	131.928	99.8825	61.512	73.8568	100.545	-0.13954	0.665241	0.907808
hsa-miR-519b-3p	3.96131	1.82509	3.24997	3.52505	3.36669	3.65936	-0.601115	0.301404	0.659244
hsa-miR-519b-5p	55.9535	117.327	81.466	55.167	66.0713	85.7335	-0.166165	0.6043	0.891209
hsa-miR-519c-3p	1.98065	0.260728	0.216665	2.64378	0.841673	2.26532	-1.51705	0.167366	0.349401
hsa-miR-519c-5p	55.9535	117.327	81.466	55.167	66.0713	85.7335	-0.166165	0.604323	0.891209
hsa-miR-519d-3p	29.9574	49.5382	26.2165	24.1466	33.4565	31.3659	-0.194197	0.561778	0.874059
hsa-miR-519d-5p	0.990327	0.521455	1.29999	1.76252	1.05209	1.74255	-1.0855	0.211756	0.47123
hsa-miR-519e-3p	0.495164	0.521455	0.216665	1.41002	0	0.522765	-1.10116	0.4965	0.466141
hsa-miR-519e-5p	0	0	0.649995	1.23377	0	0.69702	-1.90691	0.364446	0.266663
hsa-miR-520a-3p	190.39	505.551	335.181	115.269	243.033	143.238	0.557528	0.122361	1.47174
hsa-miR-520a-5p	11.6363	14.6007	15.3832	12.5139	5.05004	14.4632	-0.0727702	0.889273	0.950811
hsa-miR-520b-3p	12.8743	31.8088	23.3998	17.449	19.3585	21.0849	-0.248976	0.455086	0.841493
hsa-miR-520b-5p	8.66536	4.95382	11.2666	5.11132	5.26046	6.79595	0.148238	0.768381	1.10822
hsa-miR-520c-3p	83.9302	90.9939	89.916	91.4749	103.736	98.9769	-0.567897	0.0676342	0.6746
hsa-miR-520c-5p	26.4913	30.2444	33.5831	28.2004	29.669	28.9263	-0.370669	0.238263	0.773424
hsa-miR-520d-3p	31.1953	36.2411	26.8665	14.1002	27.3544	18.1225	0.25816	0.466912	1.19595
hsa-miR-520d-5p	19.0638	10.6898	34.2331	12.1614	20.2002	9.75828	0.210909	0.656559	1.15742
hsa-miR-520e-3p	31.6905	26.3335	20.5832	25.9091	46.0816	20.5621	-0.613661	0.129405	0.653536
hsa-miR-520e-5p	1.73307	2.08582	0.649995	3.87755	1.26251	2.61383	-1.2558	0.0898242	0.418761
hsa-miR-520f-3p	57.439	81.6077	74.9661	85.1298	72.5943	89.3929	-0.655754	0.0340393	0.634744
hsa-miR-520f-5p	0	1.56437	0.216665	0.176252	0.420837	0.174255	0.585709	0.855051	1.50078
hsa-miR-520g-3p	58.9245	55.535	60.8829	48.1169	50.7108	60.815	-0.267314	0.415444	0.830865
hsa-miR-520g-5p	9.65569	5.99673	6.49995	7.7551	12.4147	10.4553	-0.831116	0.0534148	0.562094
hsa-miR-520h	14.6073	14.6007	21.0165	8.98887	9.04799	11.1523	0.361857	0.322517	1.28508
hsa-miR-521	0.742745	0	0.43333	0	0	0.69702	0.461263	1	1.37675
hsa-miR-522-3p	22.7775	39.8913	30.5498	35.0742	46.7129	35.3738	-0.786201	0.0172748	0.579869
hsa-miR-522-5p	55.9535	117.327	81.466	55.167	66.0713	85.7335	-0.166164	0.604077	0.891209
hsa-miR-523-3p	12.6267	21.1189	19.4998	25.0278	20.621	17.774	-0.722765	0.0335201	0.605935
hsa-miR-523-5p	55.9535	117.327	81.466	55.167	66.0713	85.7335	-0.166165	0.604281	0.891209
hsa-miR-524-3p	3.96131	11.7327	8.44993	2.82004	2.52502	1.5683	1.29428	0.00789724	2.45254
hsa-miR-524-5p	5.4468	8.34328	3.89997	3.7013	2.73544	7.49297	-0.101598	0.872657	0.932
hsa-miR-525-3p	1.23791	1.56437	0.216665	0.528757	0.420837	1.04553	0.148529	1	1.10844
hsa-miR-525-5p	9.16053	14.8615	9.53326	7.22634	5.68129	7.31871	0.266791	0.482654	1.20313
hsa-miR-526a-3p	6.93229	19.0331	5.19996	6.34508	13.0459	6.27318	-0.202906	0.694638	0.868799
hsa-miR-526a-5p	26.4913	30.2444	33.5831	28.2004	29.669	28.9263	-0.370671	0.238047	0.773423
hsa-miR-526b-3p	9.65569	21.6404	19.7165	13.2189	8.62715	13.7662	0.0287448	0.952813	1.02012
hsa-miR-526b-5p	44.8123	41.9771	31.4164	51.9944	34.2982	58.0269	-0.691052	0.0639923	0.619402
hsa-miR-527	1.98065	11.2113	0	0.352505	0.631255	0.522765	2.52441	0.0243924	5.75338
hsa-miR-532-3p	39.3655	87.083	58.7162	43.5343	47.3441	58.724	-0.167455	0.606335	0.890412
hsa-miR-532-5p	1140.36	2162.47	1681.1	1326.3	1328.79	1730.53	-0.280718	0.360208	0.823182
hsa-miR-539-3p	0.495164	0	0	0.352505	0	0	0.154713	1	1.1132
hsa-miR-539-5p	0.495164	0	0	0.705009	0	0	-0.744765	0.862782	0.596765
hsa-miR-541-3p	0	0	0.649995	0.528757	0	0.174255	-0.559452	1	0.67856
hsa-miR-541-5p	0.495164	0	0	0.176252	0	0	0.956193	1	1.94018
hsa-miR-542-3p	165.88	249.255	199.548	176.957	210.208	161.36	-0.284158	0.35575	0.821221
hsa-miR-542-5p	1.73307	4.17164	1.29999	1.58627	1.05209	1.21979	0.389575	0.603779	1.31001
hsa-miR-543	0.990327	1.04291	1.29999	0.528757	0	1.21979	0.464888	0.727416	1.38021
hsa-miR-545-3p	0.495164	0.521455	0.216665	0	0	0.871275	0.0973846	1	1.06983
hsa-miR-545-5p	0	0	0	0	0	0.871275	-3.74406	0.356429	0.0746322
hsa-miR-548a-3p	10.1509	11.2113	16.4665	10.9276	8.83757	14.4632	-0.286421	0.463156	0.819934
hsa-miR-548a-5p	0.990327	0.782183	0.86666	0.528757	0.420837	0.522765	0.403938	0.755263	1.32311
hsa-miR-548aa	0.742745	1.30364	2.81664	1.23377	1.26251	2.78808	-0.548065	0.447131	0.683937
hsa-miR-548ab	5.69438	5.21455	7.36661	4.93506	3.99795	7.31871	-0.248137	0.594864	0.841983
hsa-miR-548ac	1.73307	0.782183	0	0.705009	0	1.39404	-0.0672303	1	0.954469
hsa-miR-548ad-5p	2.22824	2.34655	3.03331	2.64378	0.841673	2.43957	-0.0952627	0.941996	0.936102
hsa-miR-548ae-3p	0.247582	0	0.86666	0.705009	0	0	0.139887	1	1.10182
hsa-miR-548ae-5p	3.71373	3.38946	3.46664	4.40631	1.26251	3.65936	-0.264947	0.708944	0.83223
hsa-miR-548ag	0.247582	1.04291	1.73332	2.11503	0.210418	1.04553	-0.678447	0.568809	0.624837
hsa-miR-548ah-3p	6.18955	2.08582	5.41662	17.9777	13.0459	15.5087	-2.13164	6.92767e-06	0.228198
hsa-miR-548ah-5p	0.495164	0.260728	0	0.528757	0	1.21979	-1.49452	0.37306	0.354899
hsa-miR-548ai	0.247582	0	0.216665	0.176252	0	0.522765	-0.836225	0.798142	0.560107
hsa-miR-548aj-3p	0.247582	0	0.43333	0.176252	0	0	1.22375	0.750942	2.33552
hsa-miR-548aj-5p	0.742745	1.82509	1.08332	0.352505	0	0.174255	2.10591	0.0986155	4.30468
hsa-miR-548ak	0	0	0	0.352505	0.420837	0.174255	-3.90233	0.156204	0.0668778
hsa-miR-548al	1.23791	0.260728	2.16665	0	0.210418	2.26532	0.23493	0.873791	1.17685
hsa-miR-548am-3p	26.9864	5.47528	22.5332	38.5992	22.9356	54.3676	-1.39013	0.011302	0.38153
hsa-miR-548am-5p	0.742745	1.82509	1.94998	1.41002	1.26251	1.74255	-0.426735	0.615968	0.743943
hsa-miR-548an	3.71373	0.260728	1.29999	0.705009	1.05209	1.91681	0.269487	0.834285	1.20538
hsa-miR-548ao-3p	0.247582	1.04291	1.29999	1.76252	3.15627	2.26532	-1.87499	0.00843312	0.272629
hsa-miR-548ap-3p	0	0	0.86666	0	0	0	3.36007	0.530996	10.2679
hsa-miR-548ap-5p	0	0.260728	0	0	0.210418	0.522765	-1.70066	0.58115	0.307646
hsa-miR-548aq-3p	43.5744	21.1189	53.9496	97.82	65.6505	85.385	-1.4549	0.000541095	0.364781
hsa-miR-548aq-5p	0	1.04291	0	1.05751	0.631255	0.522765	-1.63204	0.322238	0.322631
hsa-miR-548ar-3p	9.90327	4.17164	12.7832	44.9443	11.9938	16.5542	-1.87762	0.00114666	0.272133
hsa-miR-548ar-5p	0.247582	0	0.216665	0.352505	0	0.174255	-0.519112	1	0.697801
hsa-miR-548as-5p	0	0.782183	0.649995	0.176252	0.210418	0	1.22818	0.625052	2.34272
hsa-miR-548at-3p	0	0	0	0	0.420837	0.522765	-3.84589	0.225282	0.069546
hsa-miR-548at-5p	0.495164	0	0	0	0	0.69702	-0.575149	0.862413	0.671217
hsa-miR-548au-3p	0	0	0	0.352505	0	0	-2.73276	0.689738	0.150438
hsa-miR-548au-5p	1.48549	1.82509	0.86666	1.76252	2.52502	2.78808	-1.17985	0.0801483	0.441397
hsa-miR-548av-3p	0.247582	0.260728	4.3333	5.11132	2.10418	2.61383	-1.48426	0.0895471	0.357431
hsa-miR-548av-5p	0	0.260728	0	0.176252	0	0.34851	-1.33189	0.747676	0.397249
hsa-miR-548ay-3p	0.990327	1.82509	0.216665	2.46753	0.631255	3.4851	-1.58489	0.0789778	0.333351
hsa-miR-548ay-5p	5.94196	6.51819	4.98329	9.16512	6.73338	11.1523	-1.06256	0.0104506	0.478781
hsa-miR-548az-3p	1.23791	2.34655	3.46664	2.46753	1.68335	0.871275	0.0100785	1	1.00701
hsa-miR-548az-5p	9.40811	8.08255	7.58327	6.87384	3.99795	8.71275	-0.0562263	0.924956	0.961777
hsa-miR-548b-3p	3.96131	4.95382	8.44993	1.05751	1.89376	3.13659	1.08145	0.0459494	2.11617
hsa-miR-548b-5p	9.16053	12.7756	15.5999	17.8015	11.3626	19.6908	-0.832834	0.0254631	0.561425
hsa-miR-548ba	6.43713	3.12873	4.3333	4.75881	8.20631	6.44744	-0.832793	0.0977726	0.561441
hsa-miR-548bc	50.5067	33.8946	64.1328	128.135	126.251	107.864	-1.68421	5.67093e-06	0.311173
hsa-miR-548c-3p	1.48549	0	1.51665	0	0	0.174255	3.33926	0.0952488	10.1208
hsa-miR-548c-5p	2.22824	2.34655	1.94998	3.17254	2.3146	2.43957	-0.717964	0.23352	0.607955
hsa-miR-548d-3p	2.22824	2.60728	0	1.93877	1.26251	2.78808	-0.728917	0.428669	0.603357
hsa-miR-548d-5p	14.3597	15.6437	15.5999	18.6827	15.571	19.5166	-0.665684	0.0539007	0.63039
hsa-miR-548e-3p	39.3655	41.7164	35.7497	65.0371	66.0713	59.5952	-1.12466	0.000664304	0.458609
hsa-miR-548e-5p	0	1.30364	4.98329	0.528757	0.420837	0	2.11982	0.111881	4.3464
hsa-miR-548f-3p	6.68471	4.6931	6.06662	22.7365	20.621	18.8195	-2.23603	1.87659e-08	0.21227
hsa-miR-548g-3p	0	0	0.216665	0	0.210418	0.174255	-0.894396	1	0.537972
hsa-miR-548g-5p	1.23791	1.82509	1.08332	0	0	0.522765	2.37076	0.0639908	5.17214
hsa-miR-548h-3p	3.21856	0.521455	1.94998	1.76252	1.47293	0.871275	0.134229	0.941098	1.09751
hsa-miR-548h-5p	0.247582	0	1.51665	0.176252	0	1.04553	0.122644	1	1.08873
hsa-miR-548i	7.67504	2.34655	4.98329	4.58256	3.15627	11.3266	-0.661372	0.295289	0.632277
hsa-miR-548j-3p	4.20889	1.04291	3.03331	9.34137	6.31255	4.70489	-1.65942	0.00455991	0.316566
hsa-miR-548j-5p	5.69438	3.12873	0.216665	3.34879	5.26046	3.83361	-0.776101	0.311605	0.583943
hsa-miR-548k	81.9496	61.5317	70.6328	117.032	81.4319	128.774	-1.00067	0.00575974	0.499768
hsa-miR-548l	0.990327	1.56437	8.0166	2.29128	1.47293	1.74255	0.459197	0.593308	1.37478
hsa-miR-548n	9.16053	7.82183	15.3832	19.7403	10.7313	18.9938	-1.04138	0.0130243	0.485862
hsa-miR-548o-3p	96.0617	38.0662	110.282	335.056	176.12	284.733	-2.07951	9.60096e-06	0.236595
hsa-miR-548o-5p	2.22824	2.34655	1.94998	3.17254	2.3146	2.43957	-0.718	0.233009	0.60794
hsa-miR-548p	5.4468	2.08582	5.84995	17.9777	13.0459	15.683	-2.18157	2.41198e-06	0.220435
hsa-miR-548q	0.495164	1.04291	1.73332	0.881261	0	0.34851	0.838154	0.520999	1.78776
hsa-miR-548s	2.7234	1.04291	1.29999	1.76252	0.631255	1.39404	0.0356692	1	1.02503
hsa-miR-548t-3p	0.742745	1.30364	2.81664	1.23377	1.26251	2.78808	-0.548059	0.447048	0.68394
hsa-miR-548t-5p	4.95164	2.60728	1.08332	1.58627	1.47293	1.91681	0.440541	0.525238	1.35711
hsa-miR-548u	46.0502	42.7593	94.0326	74.2022	59.1275	70.7476	-0.594089	0.11015	0.662463
hsa-miR-548v	2.7234	0.782183	0.649995	1.05751	2.52502	0.34851	-0.205412	0.940279	0.867291
hsa-miR-548w	0.247582	3.38946	1.94998	7.7551	2.73544	3.4851	-1.88278	0.00466543	0.27116
hsa-miR-548x-3p	0.247582	0	0	0.176252	0.210418	0.34851	-1.62682	0.515324	0.323801
hsa-miR-548x-5p	0.495164	1.82509	1.08332	0	0.210418	0.174255	2.49516	0.0745276	5.63791
hsa-miR-548y	5.4468	1.56437	3.46664	2.11503	6.9438	2.61383	-0.455543	0.503784	0.729236
hsa-miR-548z	3.21856	0.521455	1.94998	1.76252	1.47293	0.871275	0.134177	0.94105	1.09747
hsa-miR-549a-3p	60.6575	59.9673	97.2826	38.9518	62.2838	60.4665	0.0230347	0.950593	1.01609
hsa-miR-549a-5p	6.68471	21.9011	13.8666	8.46011	13.4668	11.8493	-0.160465	0.6798	0.894737
hsa-miR-550a-3-5p	31.1953	76.1324	49.8329	27.1428	35.1399	30.8431	0.271126	0.425542	1.20675
hsa-miR-550a-3p	7.42745	22.1618	14.0832	8.63636	5.68129	6.9702	0.519037	0.207162	1.433
hsa-miR-550a-5p	41.0986	100.902	67.1661	37.013	47.7649	41.1242	0.246909	0.459211	1.18666
hsa-miR-550b-2-5p	0	0	0.86666	0.176252	0.420837	0.522765	-0.701138	0.696303	0.615087
hsa-miR-551a	7.67504	11.9935	4.76663	0.881261	3.57711	2.26532	1.44563	0.00795489	2.72382
hsa-miR-552-3p	0.495164	1.82509	0.649995	0.352505	0.210418	0.522765	0.883268	0.522415	1.84455
hsa-miR-556-3p	0	0.521455	3.24997	0.352505	0.841673	0.871275	0.404676	0.774463	1.32379
hsa-miR-556-5p	0.990327	6.77892	5.84995	4.40631	3.57711	2.43957	-0.150596	0.781002	0.900878
hsa-miR-5572	0	0	0	0	0	0.34851	-2.5907	0.693591	0.166006
hsa-miR-5581-3p	5.94196	9.64692	6.28328	3.87755	4.20837	3.4851	0.461867	0.299519	1.37732
hsa-miR-5582-3p	1.23791	0.521455	2.38331	2.99629	1.26251	5.0534	-1.54516	0.035468	0.342659
hsa-miR-5585-3p	3.21856	3.91091	3.89997	2.46753	3.57711	2.96234	-0.131046	0.843713	0.913169
hsa-miR-5585-5p	0	0	0.216665	0.352505	0	0.871275	-2.46436	0.287616	0.181199
hsa-miR-5587-5p	1.73307	1.82509	4.76663	1.58627	0	0.522765	1.43538	0.126003	2.70453
hsa-miR-561-3p	2.47582	7.5611	3.24997	4.93506	3.15627	7.14446	-0.698672	0.1586	0.616139
hsa-miR-561-5p	17.5783	32.5909	33.5831	18.859	17.4647	18.8195	0.13183	0.705464	1.09568
hsa-miR-5680	0.495164	0	0	0	0	0.34851	0.293184	1	1.22534
hsa-miR-5681a	0	1.04291	0	0	0	0	3.43234	0.430624	10.7953
hsa-miR-5690	0.247582	0	0	0	0	0.522765	-1.05936	0.809442	0.479846
hsa-miR-5691	0	0	0.649995	0	0	0	2.99775	0.536843	7.98753
hsa-miR-5693	0.990327	0	0.649995	0.528757	0.631255	0.174255	-0.00877582	1	0.993936
hsa-miR-5697	0	1.56437	0.216665	0.528757	0	0.871275	-0.275424	0.895249	0.826207
hsa-miR-5698	0	0	0.86666	0	0	0	3.36005	0.531094	10.2678
hsa-miR-5699-3p	16.588	25.5513	36.183	21.8553	19.7793	16.7285	-0.0417124	0.907027	0.971501
hsa-miR-5699-5p	14.6073	32.3302	29.0331	18.6827	20.621	15.5087	-0.0116517	0.97732	0.991956
hsa-miR-570-3p	0.495164	2.868	0	0.352505	0.210418	1.74255	-0.00561989	1	0.996112
hsa-miR-570-5p	0.247582	0	0.216665	0.176252	0	0.522765	-0.836221	0.798147	0.560109
hsa-miR-5701	7.92262	21.6404	11.9166	5.11132	4.83962	8.18999	0.699544	0.0877232	1.62399
hsa-miR-5702	0	0	0	0.352505	0	0	-2.73267	0.688466	0.150448
hsa-miR-572	0.990327	0	0	0	0.841673	0.34851	-0.367689	1	0.775023
hsa-miR-573	31.1953	31.2873	24.9165	21.3265	21.4627	19.8651	0.0684072	0.835199	1.04856
hsa-miR-574-3p	263.179	511.026	358.147	257.505	246.4	263.474	0.0875866	0.776818	1.06259
hsa-miR-574-5p	1400.82	1601.91	1098.71	985.25	1187.81	892.36	0.00525457	0.987239	1.00365
hsa-miR-576-3p	930.412	649.733	631.578	475.705	734.149	304.772	0.178917	0.658049	1.13203
hsa-miR-576-5p	32.6808	39.6306	35.7497	38.7755	38.2961	41.4727	-0.563392	0.0827611	0.676709
hsa-miR-577	17.3307	10.4291	34.2331	44.9443	21.8835	49.6627	-1.32596	0.00457055	0.398884
hsa-miR-579-3p	0.990327	1.30364	1.08332	0.176252	0.631255	1.39404	0.196512	0.904527	1.14592
hsa-miR-579-5p	8.66536	19.5546	10.1833	4.93506	7.99589	9.06126	0.33998	0.391628	1.26574
hsa-miR-580-3p	28.9671	36.7626	24.4831	15.5102	26.9335	16.5542	0.195723	0.578818	1.1453
hsa-miR-580-5p	0.742745	0	0	0	0	0.69702	-0.0416259	1	0.971559
hsa-miR-581	4.20889	7.30037	3.89997	4.58256	4.20837	6.9702	-0.490704	0.271611	0.711678
hsa-miR-582-3p	3343.84	4561.43	5893.72	4566.52	6506.97	4774.41	-0.642103	0.0471462	0.640778
hsa-miR-582-5p	90.6149	116.545	89.4826	105.223	66.7026	134.351	-0.479088	0.168792	0.717431
hsa-miR-584-3p	6.68471	13.0364	8.6666	2.46753	2.52502	4.70489	1.07865	0.0140151	2.11205
hsa-miR-584-5p	743.488	1703.07	1092.64	767.226	975.289	986.632	-0.102853	0.743977	0.931189
hsa-miR-585-3p	2.7234	2.868	2.16665	1.76252	3.99795	5.22765	-0.89646	0.118541	0.537203
hsa-miR-589-3p	13.8646	18.5117	23.6165	14.2764	16.4126	16.2057	-0.183137	0.58708	0.880786
hsa-miR-589-5p	820.734	1937.99	1352.42	904.35	1414.22	970.078	-0.159267	0.627753	0.89548
hsa-miR-590-3p	28.7195	7.03964	53.5162	26.9666	9.46882	29.2749	0.0507155	0.937762	1.03578
hsa-miR-590-5p	5.4468	3.65019	3.03331	7.22634	9.46882	7.66722	-1.38876	0.00289649	0.381892
hsa-miR-592	0.495164	1.30364	1.08332	0.352505	0	0.34851	1.41793	0.30844	2.67202
hsa-miR-597-3p	15.8452	35.9804	24.9165	11.6326	8.83757	13.5919	0.683459	0.052597	1.60599
hsa-miR-597-5p	0.990327	1.56437	0.649995	1.23377	0	0.522765	0.327017	0.819419	1.25442
hsa-miR-598-3p	23.0251	54.492	45.933	43.8868	18.9376	59.2467	-0.47702	0.257774	0.71846
hsa-miR-598-5p	0.495164	0.521455	0.43333	0.881261	1.89376	1.21979	-1.81298	0.0522297	0.284602
hsa-miR-600	0.247582	0.260728	0	0.176252	0.210418	0.174255	-0.526387	1	0.694291
hsa-miR-602	0	0	1.08332	0	0.841673	0.174255	-0.260027	1	0.835072
hsa-miR-605-3p	1.23791	0.782183	0	0.352505	0	0.34851	1.05709	0.561448	2.08073
hsa-miR-605-5p	0.990327	4.95382	2.38331	2.46753	3.99795	2.09106	-0.539	0.341577	0.688248
hsa-miR-609	0	1.30364	0	0	0	0	3.72485	0.352526	13.2218
hsa-miR-610	4.70405	4.17164	2.16665	1.93877	0.210418	0.69702	1.47347	0.0585876	2.77688
hsa-miR-612	0	0.260728	0	0.881261	0	0.174255	-2.32012	0.387803	0.20025
hsa-miR-6128	0.742745	1.30364	1.51665	0.352505	1.05209	0.34851	0.594503	0.586441	1.50995
hsa-miR-6130	0.247582	2.34655	0.649995	0	0.631255	0.34851	1.17817	0.405406	2.26289
hsa-miR-615-3p	187.667	657.033	439.83	172.727	182.643	267.133	0.535254	0.142294	1.4492
hsa-miR-615-5p	9.65569	10.4291	8.44993	9.87013	15.3605	8.36424	-0.648285	0.0995512	0.638038
hsa-miR-616-3p	1.23791	3.12873	3.03331	2.46753	1.89376	1.5683	-0.162915	0.813754	0.893218
hsa-miR-616-5p	5.94196	7.03964	5.84995	3.87755	7.15422	2.61383	0.0493864	0.934557	1.03482
hsa-miR-618	7.67504	2.868	3.6833	6.87384	4.41878	5.57616	-0.599522	0.30748	0.659973
hsa-miR-619-5p	5.4468	11.2113	10.8332	4.93506	2.94586	5.92467	0.509274	0.248866	1.42333
hsa-miR-624-3p	0.495164	1.04291	1.08332	0.705009	1.89376	0.174255	-0.497039	0.643754	0.708559
hsa-miR-624-5p	0.990327	0.521455	4.54996	1.41002	1.26251	1.39404	0.148727	0.881584	1.10859
hsa-miR-625-3p	11.1412	33.1124	31.8497	27.3191	18.9376	25.0927	-0.418259	0.26392	0.748327
hsa-miR-625-5p	1.48549	8.08255	3.89997	3.52505	4.20837	4.53063	-0.381484	0.469202	0.767647
hsa-miR-627-3p	0.990327	4.95382	1.94998	1.05751	0	2.26532	0.685143	0.454678	1.60786
hsa-miR-627-5p	7.92262	17.9902	10.6166	5.11132	9.46882	6.79595	0.310289	0.452932	1.23996
hsa-miR-628-3p	7.17987	5.73601	12.1332	8.1076	4.41878	12.0236	-0.387034	0.417564	0.7647
hsa-miR-628-5p	7.17987	13.0364	6.93328	4.93506	3.36669	8.5385	0.223943	0.62338	1.16792
hsa-miR-629-3p	6.18955	7.82183	5.84995	4.40631	9.67924	9.06126	-0.629749	0.146596	0.646289
hsa-miR-629-5p	1372.59	1614.69	1288.72	663.237	1184.65	808.195	0.279328	0.393935	1.21363
hsa-miR-632	1.23791	3.65019	2.16665	1.76252	1.68335	2.26532	-0.182057	0.801093	0.881445
hsa-miR-635	0	0.260728	0.86666	0.352505	0	0	0.957692	0.822156	1.9422
hsa-miR-636	18.8162	19.0331	10.3999	8.98887	12.2043	8.36424	0.30651	0.456071	1.23671
hsa-miR-641	31.6905	24.5084	39.2164	35.603	27.7752	39.0331	-0.506582	0.170886	0.703888
hsa-miR-642a-3p	3.46615	4.43237	4.11663	1.23377	2.94586	3.31085	0.266767	0.611797	1.20311
hsa-miR-642a-5p	2.22824	2.868	0.86666	1.93877	0.631255	3.65936	-0.50324	0.545557	0.705521
hsa-miR-643	0.742745	2.08582	1.08332	1.23377	3.57711	3.13659	-1.45407	0.0295835	0.36499
hsa-miR-6500-3p	15.3501	37.8055	33.5831	13.3952	13.6772	19.8651	0.403579	0.256367	1.32279
hsa-miR-6501-3p	0	0	1.08332	0	0	0.34851	1.05562	0.85148	2.07861
hsa-miR-6501-5p	22.2824	15.6437	18.1999	12.6902	9.46882	7.66722	0.510399	0.212009	1.42444
hsa-miR-6503-3p	0	0.782183	0	0	0	0	3.06499	0.534233	8.36864
hsa-miR-6505-3p	0.247582	0.260728	1.73332	0.705009	0.210418	0.522765	0.166712	1	1.1225
hsa-miR-6505-5p	4.95164	5.47528	2.16665	5.64007	5.89171	5.0534	-0.823871	0.0938699	0.564924
hsa-miR-6508-3p	0	0	0	0	0	0.34851	-2.5908	0.693135	0.165994
hsa-miR-6509-3p	0.990327	0	1.51665	0.528757	3.99795	0.871275	-1.375	0.20984	0.385552
hsa-miR-6509-5p	0.990327	3.65019	1.51665	2.64378	1.05209	2.09106	-0.441706	0.592665	0.736264
hsa-miR-651-5p	6.43713	8.34328	10.1833	20.4453	10.1001	23.6987	-1.5667	0.000166587	0.33758
hsa-miR-6510-3p	1.23791	0.521455	0.86666	0.705009	1.05209	0.174255	0.0813134	1	1.05798
hsa-miR-6511a-3p	5.4468	8.08255	7.36661	4.23005	6.73338	4.18212	0.029889	0.965917	1.02093
hsa-miR-6511a-5p	1.98065	3.91091	1.29999	4.40631	1.47293	1.5683	-0.567137	0.427563	0.674955
hsa-miR-6511b-3p	4.45647	6.25746	6.93328	4.40631	6.73338	6.62169	-0.43666	0.296103	0.738843
hsa-miR-6511b-5p	7.67504	7.03964	5.84995	8.1076	5.68129	4.70489	-0.275807	0.552166	0.825988
hsa-miR-6513-3p	0	1.30364	1.51665	0.176252	0	0.522765	1.36677	0.463047	2.57892
hsa-miR-6513-5p	0.742745	0.260728	1.29999	0.528757	1.05209	0.174255	0.0307219	1	1.02152
hsa-miR-6514-5p	1.73307	1.56437	2.59998	1.05751	1.68335	1.39404	0.107489	0.923841	1.07735
hsa-miR-6515-3p	0	0.521455	0	0	0	0	2.57032	0.690312	5.93942
hsa-miR-6515-5p	3.21856	11.472	7.14994	2.99629	6.9438	4.18212	0.14713	0.789381	1.10736
hsa-miR-6516-3p	1.23791	3.38946	1.94998	2.82004	2.94586	2.61383	-0.823882	0.151958	0.56492
hsa-miR-6516-5p	5.19922	9.38619	12.9999	6.87384	2.3146	5.92467	0.374284	0.456363	1.2962
hsa-miR-652-3p	841.778	1704.38	1292.84	543.562	817.475	713.052	0.423782	0.17569	1.34144
hsa-miR-652-5p	18.8162	9.12546	11.0499	60.102	26.9335	34.6768	-2.01895	2.68872e-05	0.246738
hsa-miR-653-3p	0.495164	0	1.94998	0	0	0.69702	1.34764	0.547416	2.54495
hsa-miR-653-5p	2.97098	2.34655	0.43333	1.76252	2.3146	1.91681	-0.441919	0.57363	0.736155
hsa-miR-654-3p	2.22824	3.91091	4.54996	1.58627	2.94586	3.31085	0.0123657	1	1.00861
hsa-miR-654-5p	0.495164	2.868	0.43333	1.58627	2.52502	1.39404	-1.05132	0.206293	0.482527
hsa-miR-655-3p	0	0	0	0.176252	0	0.174255	-2.67152	0.601433	0.156961
hsa-miR-656-3p	0	0	0.216665	0.176252	0	0	-0.154794	1	0.89826
hsa-miR-659-3p	0	1.56437	0.43333	0	0.420837	0	1.59378	0.475591	3.0184
hsa-miR-659-5p	56.6962	96.4692	73.6661	30.3154	59.5484	33.1085	0.438223	0.208002	1.35493
hsa-miR-660-3p	0.495164	2.60728	1.08332	1.93877	1.68335	1.74255	-0.866258	0.239014	0.548568
hsa-miR-660-5p	74.5221	84.4757	154.049	136.419	73.6464	153.519	-0.664241	0.0869208	0.631021
hsa-miR-663b	1.73307	2.60728	0.86666	0.881261	1.68335	0.174255	0.487621	0.6511	1.40213
hsa-miR-664a-3p	7.67504	7.03964	5.63329	13.5714	3.78753	8.88701	-0.807915	0.118387	0.571207
hsa-miR-664a-5p	11.6363	20.5975	17.9832	5.11132	10.7313	6.44744	0.73004	0.0547521	1.65868
hsa-miR-664b-3p	0.247582	0	0.86666	1.05751	0	1.04553	-1.27363	0.456914	0.413617
hsa-miR-664b-5p	0.990327	1.30364	1.73332	0.176252	2.94586	0.522765	-0.224176	0.865552	0.856084
hsa-miR-668-3p	0.742745	0	0	0	0	0	3.43301	0.472773	10.8004
hsa-miR-671-3p	147.806	259.163	291.198	116.855	128.145	152.647	0.350779	0.2673	1.27525
hsa-miR-671-5p	2036.86	2247.99	1293.92	678.395	1201.07	555.525	0.79639	0.0371182	1.73675
hsa-miR-6715a-3p	0	0	0	0.176252	0	0.34851	-3.15241	0.412557	0.112468
hsa-miR-6715b-3p	0.495164	0	0.86666	0.528757	1.26251	0.174255	-0.821981	0.595208	0.565665
hsa-miR-6716-3p	15.5977	15.9044	15.8165	7.05009	8.83757	5.92467	0.701625	0.0606091	1.62634
hsa-miR-6716-5p	0	0	0.86666	0	0	0	3.36004	0.531159	10.2677
hsa-miR-6720-3p	18.3211	28.68	27.9498	20.7978	28.6169	19.8651	-0.334465	0.302385	0.793078
hsa-miR-6720-5p	3.96131	8.86474	9.31659	1.93877	2.10418	4.35638	0.924694	0.0586657	1.89828
hsa-miR-6721-5p	0.495164	0	1.73332	1.58627	0.420837	1.04553	-0.851758	0.464873	0.554109
hsa-miR-6724-5p	21.7872	52.4062	35.5331	12.1614	12.2043	12.1979	1.09486	0.00131074	2.13592
hsa-miR-6727-5p	0.247582	0.260728	1.08332	0	0.210418	0	2.26937	0.307738	4.82112
hsa-miR-6728-3p	0	1.30364	0	0	0	0.522765	0.634767	0.881467	1.55269
hsa-miR-6728-5p	3.21856	2.868	2.81664	0.176252	1.89376	1.74255	0.853268	0.244158	1.80659
hsa-miR-6729-3p	0	0	0	0	0.631255	0	-3.2982	0.550558	0.101658
hsa-miR-6729-5p	0	0	0.43333	0.528757	0.210418	0	-1.09218	0.823111	0.469051
hsa-miR-6730-3p	0	0.782183	0	0	0.210418	0	1.10689	0.808515	2.15381
hsa-miR-6730-5p	0	0	0	0.528757	0.420837	0	-3.93835	0.230971	0.0652285
hsa-miR-6731-5p	1.23791	0.260728	0	0.528757	0.210418	0.871275	-0.386019	0.896449	0.765238
hsa-miR-6732-3p	0	0.782183	0	0	0	0	3.06488	0.535319	8.36796
hsa-miR-6733-5p	2.7234	8.34328	2.16665	4.93506	2.73544	2.96234	-0.217002	0.742697	0.860351
hsa-miR-6734-3p	0	0.260728	0	0	0	0.174255	-0.0250365	1	0.982796
hsa-miR-6734-5p	0.495164	0.521455	0	0	1.89376	0.174255	-1.29866	0.473535	0.406505
hsa-miR-6735-3p	0.495164	1.04291	1.94998	0	0.631255	0.871275	0.774836	0.541151	1.711
hsa-miR-6735-5p	2.7234	2.868	4.11663	0.352505	0.631255	0.871275	1.93383	0.00566905	3.82068
hsa-miR-6736-5p	1.48549	0.260728	4.11663	0	0	0.174255	4.19013	0.00629634	18.2539
hsa-miR-6737-3p	0.495164	0	1.08332	0.352505	0.210418	0.69702	-0.0442547	1	0.969791
hsa-miR-6737-5p	2.97098	0.521455	1.29999	0	1.26251	1.21979	0.699527	0.534417	1.62397
hsa-miR-6738-3p	0.247582	0.521455	0.216665	0	0	0	3.51649	0.234853	11.4437
hsa-miR-6739-3p	0.247582	0	0	0	0	0.174255	0.1814	1	1.13398
hsa-miR-6739-5p	0	0.260728	0.86666	0.528757	0	0.174255	0.113204	1	1.08163
hsa-miR-6740-3p	0	2.08582	0	0.352505	0	0	1.63053	0.558971	3.09626
hsa-miR-6740-5p	0.495164	0	0	0	0	0.34851	0.292614	1	1.22486
hsa-miR-6741-3p	1.98065	0	1.94998	1.76252	0.841673	0	0.219967	0.888255	1.16471
hsa-miR-6741-5p	0.990327	1.30364	1.51665	0.176252	0.841673	0.871275	0.593119	0.602406	1.5085
hsa-miR-6742-3p	0	0	0	0.176252	0	0.174255	-2.67156	0.601094	0.156957
hsa-miR-6742-5p	0	0	0.649995	0	0	0	2.99776	0.536759	7.98762
hsa-miR-6743-3p	1.98065	0	0.43333	0.176252	0.210418	1.04553	0.523162	0.827638	1.4371
hsa-miR-6744-5p	0.247582	0.260728	0	0.352505	0	0	-0.011959	1	0.991745
hsa-miR-6745	0	0	0	0	0.210418	0.522765	-3.51929	0.31757	0.0872143
hsa-miR-6746-3p	0	0	0	0.352505	0	0.34851	-3.54627	0.297353	0.0855983
hsa-miR-6746-5p	0	0	0.216665	0.176252	0	0	-0.154549	1	0.898413
hsa-miR-6747-3p	0.495164	1.56437	0.43333	0	0	0.522765	1.61748	0.34103	3.06838
hsa-miR-6747-5p	0	0	0	0	1.26251	0	-4.22887	0.261629	0.0533313
hsa-miR-6748-5p	0	2.34655	0	0	0	0.174255	2.67908	0.33104	6.40446
hsa-miR-6749-5p	0	0.782183	0	0	0	0	3.06508	0.533438	8.36914
hsa-miR-675-3p	2.97098	3.38946	7.58327	3.7013	6.10213	3.13659	-0.311353	0.551926	0.805886
hsa-miR-675-5p	6.68471	3.38946	5.63329	4.75881	8.20631	8.5385	-0.807263	0.093673	0.571465
hsa-miR-6750-5p	0	1.04291	0	0	0	0	3.43233	0.430733	10.7953
hsa-miR-6751-3p	0.742745	1.04291	0.649995	0.528757	0.841673	0.522765	-0.0674192	1	0.954344
hsa-miR-6751-5p	0.742745	0.521455	0	0.528757	0.210418	1.04553	-0.862429	0.548411	0.550026
hsa-miR-6753-3p	3.21856	4.17164	4.11663	0	1.05209	0.871275	2.16067	0.00287596	4.47123
hsa-miR-6754-5p	0	0	0.216665	0	0	0.69702	-1.68642	0.667055	0.310697
hsa-miR-6755-5p	0.742745	0.782183	0	0	0.420837	0.522765	0.309089	1	1.23892
hsa-miR-6756-3p	0	2.08582	1.08332	0.705009	0.420837	0.69702	0.211395	1	1.15781
hsa-miR-6756-5p	0	0	0	0	0.420837	0	-2.77861	0.699975	0.145732
hsa-miR-6757-5p	0	0	1.08332	1.05751	0.420837	0	-0.904558	0.622316	0.534197
hsa-miR-6758-3p	0	1.30364	0.43333	0.176252	0	0	2.24983	0.353905	4.75628
hsa-miR-6758-5p	0.495164	0	3.24997	0.176252	2.10418	0.34851	0.144637	1	1.10545
hsa-miR-6759-5p	1.23791	1.82509	3.03331	0.528757	0.841673	0.69702	1.10747	0.182266	2.15468
hsa-miR-676-3p	0	0	0	0	1.68335	0.174255	-4.76001	0.0964421	0.0369058
hsa-miR-6762-3p	0.990327	0.782183	1.51665	0.176252	0	0.174255	2.54652	0.0575473	5.84225
hsa-miR-6763-3p	0	0	0.649995	0	0	0	2.99778	0.536675	7.9877
hsa-miR-6763-5p	0.247582	0.782183	0.86666	0.176252	1.05209	0	0.196911	1	1.14624
hsa-miR-6764-3p	0.247582	2.60728	0.86666	0.176252	0.210418	0.34851	1.69312	0.183446	3.23356
hsa-miR-6764-5p	0.247582	0.521455	0	0	0.841673	1.04553	-1.61911	0.360847	0.325537
hsa-miR-6765-3p	0	0.260728	0	0	0.210418	0	-0.143271	1	0.905464
hsa-miR-6765-5p	0.247582	0	0	0.528757	0	0	-1.2149	0.813043	0.430802
hsa-miR-6766-3p	0	0.260728	0.649995	0	0	0.174255	1.55242	0.748076	2.93308
hsa-miR-6766-5p	0	0	0	0	0.420837	0	-2.7787	0.700501	0.145723
hsa-miR-6767-3p	0.247582	0	0.216665	0	0	0	2.68526	0.605166	6.43196
hsa-miR-6767-5p	0	0.260728	0	0	1.05209	0	-2.16798	0.566194	0.222522
hsa-miR-6768-5p	0	1.30364	0.43333	0.352505	1.05209	0	-0.236219	0.894759	0.848968
hsa-miR-6769a-5p	0	1.04291	0	0	0	0	3.43232	0.430832	10.7952
hsa-miR-6769b-3p	0.495164	0.521455	0.43333	0	0	0	4.07992	0.103962	16.9114
hsa-miR-6769b-5p	0.990327	0	0	0.528757	0	0	0.566647	0.891059	1.48108
hsa-miR-6770-3p	0.247582	2.08582	0.216665	0.176252	0.420837	0	1.45805	0.411072	2.74737
hsa-miR-6770-5p	0.247582	0.782183	0	1.05751	0.841673	0.522765	-1.68978	0.213211	0.309974
hsa-miR-6771-5p	0.990327	2.08582	0.43333	0	0	0	5.25391	0.0120978	38.1579
hsa-miR-6772-3p	2.47582	6.77892	5.19996	1.05751	3.36669	2.09106	0.694406	0.233867	1.61822
hsa-miR-6772-5p	0	0.260728	0	0	0	0.34851	-0.78813	1	0.579094
hsa-miR-6775-3p	0	4.43237	1.94998	0.352505	0.210418	0.69702	1.68624	0.160731	3.21817
hsa-miR-6775-5p	0	0	0.216665	0.705009	0	0	-1.85569	0.672519	0.276301
hsa-miR-6776-3p	0	0	0.216665	0	0.420837	0.174255	-1.43322	0.750712	0.370304
hsa-miR-6776-5p	0	1.04291	0	0.176252	0.420837	0	0.175587	1	1.12942
hsa-miR-6777-3p	0	0	0	0.352505	0	0	-2.73264	0.688038	0.150451
hsa-miR-6777-5p	0	1.30364	0	0.705009	1.05209	0.34851	-1.24565	0.448639	0.421718
hsa-miR-6778-5p	0.247582	0.260728	0	0	0	0	2.70748	0.605564	6.53181
hsa-miR-6779-3p	0	1.04291	0	0.176252	0	0	1.50652	0.668554	2.84124
hsa-miR-6779-5p	1.98065	1.56437	0.216665	0.176252	0.210418	0.871275	1.16623	0.365819	2.24425
hsa-miR-6780a-3p	0	0	0.649995	0	0	0	2.99799	0.535527	7.98884
hsa-miR-6780a-5p	0.495164	3.38946	1.29999	0.528757	3.36669	0.522765	-0.257764	0.824472	0.836383
hsa-miR-6781-3p	0.742745	0	1.29999	0.528757	0.210418	0.174255	0.72547	0.656038	1.65344
hsa-miR-6781-5p	0.495164	1.04291	1.29999	0.176252	0	0	3.05619	0.0642685	8.31772
hsa-miR-6782-3p	2.22824	2.34655	0	1.05751	0.210418	1.91681	0.107362	0.940725	1.07726
hsa-miR-6782-5p	0.495164	0	0	0.352505	0	0	0.154373	1	1.11294
hsa-miR-6783-3p	0	0.260728	1.29999	0.528757	0.420837	0.871275	-0.644269	0.666431	0.639817
hsa-miR-6783-5p	1.73307	4.95382	1.08332	1.76252	2.94586	1.21979	-0.0995158	0.945513	0.933346
hsa-miR-6784-5p	0	0.782183	0	0	0	0	3.06513	0.532993	8.36942
hsa-miR-6785-5p	1.48549	1.56437	1.73332	0	0	0.34851	3.08537	0.012583	8.48766
hsa-miR-6786-3p	0.247582	0	1.29999	0.176252	0.210418	0.34851	0.633607	0.850983	1.55144
hsa-miR-6787-5p	0.495164	0	0.649995	0	0	0	3.84654	0.229883	14.3855
hsa-miR-6788-3p	0.990327	3.38946	4.3333	0.705009	0	0.522765	2.2098	0.0165006	4.62613
hsa-miR-6788-5p	0	0.260728	1.51665	0.352505	0	0.871275	0.0489593	1	1.03452
hsa-miR-6789-3p	0.247582	1.82509	0	0.528757	0.631255	0.69702	-0.395047	0.895311	0.760465
hsa-miR-6789-5p	0.495164	0.782183	0	0	0	0.174255	2.02968	0.456847	4.08315
hsa-miR-6790-5p	0	1.04291	0.86666	0.528757	1.89376	0	-0.821311	0.591569	0.565928
hsa-miR-6791-3p	0	0.782183	0	0	0	0	3.06532	0.531181	8.37056
hsa-miR-6791-5p	0	0	0.216665	0	0.210418	0	-0.183439	1	0.880602
hsa-miR-6793-5p	1.23791	2.08582	0	0	0	0	5.20471	0.0376351	36.8785
hsa-miR-6794-3p	0	0	1.29999	0	0	0	3.89091	0.34222	14.8347
hsa-miR-6794-5p	0.247582	0	1.29999	0	0	0.522765	1.07681	0.742953	2.10936
hsa-miR-6795-5p	0	0.521455	0	0	0	0	2.57042	0.689751	5.93982
hsa-miR-6797-3p	0	0	0.43333	0.176252	0.420837	0.34851	-1.31154	0.617354	0.40289
hsa-miR-6797-5p	3.71373	0.260728	0.43333	1.05751	1.26251	0	0.684608	0.636524	1.60727
hsa-miR-6798-3p	3.46615	3.65019	3.6833	0.352505	1.05209	1.74255	1.35788	0.0405377	2.56308
hsa-miR-6798-5p	0	0.260728	0	0	0	1.21979	-2.38522	0.45594	0.191415
hsa-miR-6799-3p	0.247582	0	1.73332	0	2.73544	0.174255	-0.875302	0.623729	0.54514
hsa-miR-6799-5p	0.495164	0	0	0.352505	0	0	0.15388	1	1.11256
hsa-miR-6800-3p	0.247582	3.12873	3.24997	0	0	0.174255	4.2178	0.00293429	18.6074
hsa-miR-6800-5p	0	1.04291	0.216665	0.528757	0	0	0.482735	1	1.39739
hsa-miR-6801-3p	0.742745	0	0.86666	0.528757	1.26251	0.69702	-0.910214	0.503185	0.532106
hsa-miR-6801-5p	0.495164	0	0	0	0.210418	0.522765	-0.678363	0.826598	0.624874
hsa-miR-6802-3p	1.23791	0	0	0	0	0.174255	2.28921	0.503554	4.88788
hsa-miR-6802-5p	0	0.260728	0.43333	0.528757	0	0.34851	-0.797747	0.830413	0.575247
hsa-miR-6803-3p	0	0	0	0.176252	0	0.34851	-3.1525	0.411874	0.112461
hsa-miR-6803-5p	0	0	0.216665	0	0.210418	0	-0.182793	1	0.880996
hsa-miR-6804-5p	0.990327	0.260728	1.08332	0	0	0	4.80265	0.038668	27.9088
hsa-miR-6805-3p	0	0	0.216665	0.176252	0	0	-0.154026	1	0.898739
hsa-miR-6805-5p	0	0.521455	3.03331	2.46753	1.26251	2.78808	-1.32666	0.160691	0.398691
hsa-miR-6806-3p	1.48549	4.6931	7.14994	0.881261	1.89376	3.4851	0.62353	0.359325	1.54064
hsa-miR-6807-3p	0	0	0	0	0.631255	0.34851	-3.88689	0.229712	0.0675974
hsa-miR-6807-5p	4.70405	6.25746	2.81664	0.528757	2.10418	0.871275	1.56853	0.0174046	2.96603
hsa-miR-6808-3p	0.495164	1.56437	0	0.705009	0.420837	0	0.290556	0.893816	1.22311
hsa-miR-6810-3p	0	0.260728	0.86666	0.705009	0.631255	0.522765	-1.11193	0.399034	0.462674
hsa-miR-6810-5p	0	0.260728	0	0	0.420837	0	-0.966116	1	0.511882
hsa-miR-6811-5p	0	1.30364	0	0.705009	0	1.04553	-1.02561	0.533414	0.491201
hsa-miR-6812-3p	0	2.868	1.94998	0.176252	0.420837	0	2.35938	0.0900701	5.1315
hsa-miR-6812-5p	1.48549	0.260728	0.43333	1.41002	1.47293	0.34851	-0.876133	0.479567	0.544826
hsa-miR-6813-5p	0	0.260728	0	0	0	0.871275	-1.93733	0.564942	0.261099
hsa-miR-6814-3p	0	0	1.08332	0	0	0.174255	1.82011	0.660081	3.53109
hsa-miR-6814-5p	0	1.30364	0	0.352505	0	0.174255	0.540156	0.861204	1.45413
hsa-miR-6815-3p	0	0	0	0.352505	0	0	-2.73268	0.688709	0.150446
hsa-miR-6815-5p	0	1.30364	0	1.05751	0.420837	1.21979	-1.61011	0.199144	0.327574
hsa-miR-6817-3p	0	0.260728	0	0	0	0.174255	-0.0249587	1	0.982849
hsa-miR-6817-5p	0.742745	0	0	0	0	0	3.43289	0.472198	10.7995
hsa-miR-6818-3p	0.247582	0.260728	0.216665	0.352505	0	0.522765	-0.679461	0.814711	0.624398
hsa-miR-6818-5p	0	0	1.29999	0.881261	0.631255	0	-0.672579	0.728936	0.627384
hsa-miR-6819-3p	0	0.782183	0	0.176252	0.420837	0.174255	-0.513098	1	0.700716
hsa-miR-6819-5p	0	0.260728	0	0	1.47293	1.21979	-3.45834	0.0734411	0.090978
hsa-miR-6820-3p	1.23791	2.08582	1.29999	1.05751	1.05209	1.5683	-0.127582	0.913988	0.915364
hsa-miR-6820-5p	1.48549	2.34655	3.24997	1.41002	0.841673	0	1.14216	0.241135	2.20711
hsa-miR-6821-5p	0	0.260728	0.649995	0	0	0.34851	0.785979	1	1.72426
hsa-miR-6823-3p	0	0	0	0	0	0.522765	-3.08536	0.533454	0.117819
hsa-miR-6823-5p	0	0	0.216665	0.528757	0	0	-1.47879	0.806637	0.358791
hsa-miR-6824-3p	0	1.30364	0.649995	0	0.631255	0.69702	0.0434501	1	1.03058
hsa-miR-6824-5p	0.990327	0	0	0	0	0.174255	1.98626	0.59353	3.96207
hsa-miR-6825-3p	0	0	0	0	0.631255	0	-3.29826	0.5512	0.101654
hsa-miR-6825-5p	0.495164	0.260728	0	0.881261	0	0.522765	-1.2412	0.50583	0.42302
hsa-miR-6826-3p	0.495164	0.260728	0.216665	0	1.26251	0	-0.618845	0.772239	0.651192
hsa-miR-6826-5p	0	1.04291	0	0.528757	0	0.174255	-0.136982	1	0.90942
hsa-miR-6827-3p	0.247582	0	0	0	0	0.34851	-0.569901	1	0.673663
hsa-miR-6829-5p	0.990327	1.82509	0	0	2.3146	0.174255	-0.207201	0.934698	0.866216
hsa-miR-6830-3p	0	0.260728	0	0.528757	0	0.174255	-1.76233	0.587903	0.294772
hsa-miR-6830-5p	0	0	0	0	0	0.34851	-2.59088	0.692797	0.165985
hsa-miR-6831-5p	0.742745	0	0	0	0	0	3.4325	0.47035	10.7965
hsa-miR-6832-3p	0.990327	0.782183	0	0	0.420837	1.04553	-0.0549389	1	0.962635
hsa-miR-6832-5p	0.742745	0.260728	0.216665	0.176252	0.420837	0.69702	-0.401945	0.854797	0.756837
hsa-miR-6833-3p	0.247582	0.260728	0	0	0.210418	0.174255	0.00781504	1	1.00543
hsa-miR-6834-3p	0	0.260728	0	0	0.210418	0.34851	-1.34562	0.749442	0.393485
hsa-miR-6834-5p	2.97098	2.60728	4.11663	1.41002	0	0.34851	1.92476	0.0253018	3.79673
hsa-miR-6836-3p	0	0	0.86666	0	0	0.871275	-0.379271	0.880452	0.768826
hsa-miR-6836-5p	0.247582	0.521455	0	0	0	0	3.18165	0.415838	9.07343
hsa-miR-6837-3p	0.990327	2.34655	0.43333	0.352505	0.210418	1.21979	0.568797	0.648991	1.48329
hsa-miR-6838-5p	0	1.30364	0.216665	0.705009	0.210418	0	0.0464919	1	1.03275
hsa-miR-6839-5p	1.48549	3.91091	3.6833	0.528757	1.05209	0.34851	1.75208	0.0261129	3.36845
hsa-miR-6840-3p	4.95164	9.90765	5.19996	1.05751	0.841673	1.5683	2.029	0.000153032	4.08122
hsa-miR-6840-5p	21.292	14.8615	17.1165	25.9091	27.9856	20.7364	-0.873108	0.020128	0.545969
hsa-miR-6842-3p	2.97098	13.2971	5.84995	0.352505	2.52502	0.871275	2.07114	0.00216476	4.2022
hsa-miR-6844	0	0	0	0.528757	0	0.522765	-4.08645	0.170297	0.0588648
hsa-miR-6845-3p	0.495164	0	0	0	0	0	2.89497	0.70683	7.43826
hsa-miR-6847-3p	0	1.30364	0	0.352505	0.210418	0.69702	-0.54701	0.880403	0.684437
hsa-miR-6847-5p	8.1702	12.7756	5.63329	5.81632	7.57506	6.27318	-0.0103243	1	0.992869
hsa-miR-6848-5p	2.22824	1.04291	0.649995	0.176252	0	0.522765	2.01175	0.124026	4.03271
hsa-miR-6849-3p	0	0	0	0	0	0.34851	-2.59097	0.692397	0.165974
hsa-miR-6849-5p	0	0.782183	0	0.528757	0	0.34851	-0.773861	0.852731	0.58485
hsa-miR-6850-3p	0.247582	1.56437	2.38331	0.352505	2.3146	1.39404	-0.38814	0.66997	0.764114
hsa-miR-6850-5p	6.43713	16.6866	10.1833	7.22634	11.573	5.57616	-0.0303124	0.957364	0.979208
hsa-miR-6851-5p	0.742745	0	3.24997	0.176252	0.631255	0	1.86285	0.229876	3.63726
hsa-miR-6852-5p	0.990327	0.521455	0	0	0.420837	0.522765	0.36767	0.880336	1.29027
hsa-miR-6853-3p	0	0	0	0.176252	0.210418	0	-2.74097	0.606678	0.149584
hsa-miR-6854-5p	0	0	0.43333	0.352505	0	1.21979	-2.04192	0.344704	0.24284
hsa-miR-6855-3p	0.990327	0.260728	0	0	0	0	4.03377	0.21854	16.3789
hsa-miR-6855-5p	0	0	0.216665	0	0	0.174255	-0.0621707	1	0.957822
hsa-miR-6856-5p	0	0	0.43333	0	0	0	2.51288	0.686687	5.70757
hsa-miR-6857-3p	0.742745	1.30364	0	0.176252	0	0.174255	1.84105	0.350664	3.58272
hsa-miR-6857-5p	0	0	0.216665	0	0	0.174255	-0.0621659	1	0.957825
hsa-miR-6858-3p	0	0	0	0.352505	0	0.34851	-3.54627	0.297379	0.0855984
hsa-miR-6858-5p	0.247582	1.82509	0	0.881261	0.210418	0.174255	0.0626405	1	1.04438
hsa-miR-6859-3p	0	0	0	0.352505	0	0.871275	-4.25898	0.136281	0.0522298
hsa-miR-6859-5p	1.23791	2.34655	1.51665	0	0	1.5683	1.22044	0.306268	2.33019
hsa-miR-6861-5p	0.495164	0	0	0	0	0	2.89477	0.706413	7.43727
hsa-miR-6862-3p	0.742745	0	1.08332	0	0.420837	0.34851	0.905174	0.637814	1.87277
hsa-miR-6862-5p	2.7234	0.260728	3.46664	0.705009	1.47293	1.74255	0.393254	0.672925	1.31335
hsa-miR-6864-5p	0.247582	0	0	0.352505	0	0	-0.700223	1	0.615477
hsa-miR-6865-5p	0	0	0	0.352505	0	0	-2.73266	0.688399	0.150448
hsa-miR-6866-5p	8.41778	6.77892	6.49995	12.5139	8.41673	8.5385	-0.85949	0.043666	0.551147
hsa-miR-6868-3p	1.48549	1.30364	0	1.23377	2.73544	1.74255	-1.40219	0.136552	0.378354
hsa-miR-6869-5p	1.48549	2.08582	3.46664	0.352505	4.41878	0.69702	-0.020603	1	0.985821
hsa-miR-6871-3p	0.247582	0.782183	0	0	0	0	3.5326	0.316615	11.5723
hsa-miR-6871-5p	0	1.04291	0	0.176252	0.420837	0	0.17585	1	1.12963
hsa-miR-6873-3p	6.68471	6.77892	1.73332	2.64378	4.41878	3.31085	0.158853	0.795737	1.1164
hsa-miR-6874-3p	0	0	1.73332	0.352505	0	0.34851	0.745601	0.780587	1.67667
hsa-miR-6874-5p	0	1.04291	0	0.176252	0.420837	0.174255	-0.149425	1	0.90161
hsa-miR-6875-3p	0.742745	0	0	0	0	0	3.43254	0.470549	10.7969
hsa-miR-6875-5p	1.73307	1.56437	1.29999	0.176252	0.210418	0.69702	1.60605	0.112523	3.04417
hsa-miR-6876-5p	0	0.521455	0	0.705009	0	0	-1.04951	0.859318	0.483133
hsa-miR-6877-5p	1.48549	9.12546	4.3333	2.64378	4.20837	4.35638	-0.102382	0.853221	0.931494
hsa-miR-6878-5p	0.742745	0.782183	0.216665	0	1.47293	0.174255	-0.24568	0.901393	0.843418
hsa-miR-6879-5p	0	0.521455	0	0	0	0	2.5703	0.690413	5.93935
hsa-miR-6880-3p	0	0	0.649995	0	0	0	2.99809	0.534938	7.98942
hsa-miR-6880-5p	0	0.521455	0	0	0	0	2.57042	0.689748	5.93983
hsa-miR-6881-3p	0	1.30364	0	0.528757	0	1.5683	-1.24923	0.470403	0.420671
hsa-miR-6882-3p	0	0.260728	0	0	0	0.34851	-0.788161	1	0.579082
hsa-miR-6882-5p	0.990327	1.56437	1.73332	1.05751	1.47293	1.21979	-0.23782	0.824773	0.848026
hsa-miR-6884-3p	0.495164	0	0	0	0	0.69702	-0.575454	0.862178	0.671075
hsa-miR-6884-5p	2.97098	0.260728	0	2.11503	1.05209	1.21979	-0.678259	0.60845	0.624919
hsa-miR-6885-3p	0.247582	0.782183	0	0.176252	0	0.174255	0.856817	0.797133	1.81104
hsa-miR-6886-3p	0.247582	0.782183	1.51665	0	0.420837	0.69702	0.72421	0.663806	1.652
hsa-miR-6887-3p	0	0	1.08332	0	0	0	3.65001	0.420675	12.5534
hsa-miR-6889-3p	0	0	0.43333	0	0	0	2.51342	0.684894	5.70972
hsa-miR-6889-5p	0	0	0.86666	0	0	0.174255	1.53271	0.800004	2.89329
hsa-miR-6890-5p	0	0.521455	0	0	0.631255	0	-0.723126	1	0.605783
hsa-miR-6891-5p	0	1.04291	0	0	0	0	3.43223	0.431818	10.7946
hsa-miR-6892-5p	0.990327	1.56437	0	0	0	0	4.84175	0.0675085	28.6755
hsa-miR-6894-3p	0	0.521455	1.08332	0	0	0.174255	2.28518	0.349443	4.87425
hsa-miR-6894-5p	0.247582	0	1.08332	0.176252	0	0.34851	0.835592	0.707553	1.78459
hsa-miR-6895-3p	0	0	0.86666	0	0	0.34851	0.768201	1	1.70314
hsa-miR-6895-5p	0	0.521455	0.216665	0	0	0.522765	-0.0436183	1	0.970219
hsa-miR-7-1-3p	10.8936	29.4622	15.1665	18.859	14.7293	19.3423	-0.432851	0.236229	0.740797
hsa-miR-7-5p	18336.4	6150.82	8268.58	39064.6	36141.7	47026.4	-2.19183	5.9996e-06	0.218874
hsa-miR-708-3p	1.73307	12.5149	12.7832	3.87755	7.99589	3.65936	0.282464	0.639555	1.21627
hsa-miR-708-5p	3.71373	3.65019	3.46664	3.7013	1.68335	4.00787	-0.234	0.731026	0.850274
hsa-miR-7106-3p	0	0.521455	1.29999	0	0	0	4.3148	0.129332	19.9014
hsa-miR-7107-3p	0.247582	0	0	0	1.68335	0	-2.61802	0.321642	0.162891
hsa-miR-7107-5p	0	0	0	0	0	0.522765	-3.08526	0.534175	0.117827
hsa-miR-7108-5p	0	1.04291	0.216665	0.176252	0.631255	0	0.0835208	1	1.0596
hsa-miR-7109-3p	0	0.260728	1.73332	0	1.26251	0.34851	-0.091906	1	0.938282
hsa-miR-7109-5p	0	0.782183	0	0.176252	0.841673	0.174255	-1.08243	0.708451	0.472234
hsa-miR-7111-3p	2.47582	2.60728	1.73332	0.528757	0.631255	0.69702	1.42272	0.0656	2.68091
hsa-miR-7111-5p	1.23791	1.04291	0.649995	3.52505	4.41878	2.26532	-2.19808	0.000907654	0.217927
hsa-miR-7112-3p	0	0.521455	0	0.176252	0	0	0.645577	1	1.56437
hsa-miR-7112-5p	0	0	0	0.352505	0	0	-2.73265	0.688283	0.150449
hsa-miR-7113-5p	0.247582	3.91091	1.29999	1.41002	2.10418	1.91681	-0.532319	0.533116	0.691443
hsa-miR-7114-3p	0	0.521455	0	0	0.210418	0	0.615765	1	1.53237
hsa-miR-7114-5p	0	0.260728	1.73332	0.528757	0	0.174255	0.8827	0.668652	1.84382
hsa-miR-7156-5p	0	0	0	0	0	0.34851	-2.59127	0.691057	0.165939
hsa-miR-7161-3p	0	1.56437	0	0	0	0	3.96784	0.339531	15.6473
hsa-miR-7161-5p	0	0	0	0.352505	0	0	-2.73271	0.689109	0.150443
hsa-miR-744-3p	12.8743	22.944	19.9332	11.6326	10.5209	11.3266	0.268156	0.443557	1.20427
hsa-miR-744-5p	1157.69	1807.62	1759.1	1008.16	1145.31	1137.01	0.0700796	0.813761	1.04977
hsa-miR-7515	0	1.30364	0.216665	0	0	0	3.9652	0.247901	15.6186
hsa-miR-758-3p	3.96131	4.17164	1.08332	1.58627	1.05209	1.91681	0.583695	0.414048	1.49868
hsa-miR-760	145.083	283.672	260.648	94.6475	146.872	130.169	0.429994	0.175358	1.34723
hsa-miR-765	2.7234	3.38946	1.51665	0.705009	1.05209	1.39404	0.8355	0.239954	1.78448
hsa-miR-766-3p	51.0019	108.984	74.3161	55.872	63.3359	55.7616	-0.0573991	0.85701	0.960995
hsa-miR-766-5p	3.21856	6.51819	6.93328	2.29128	6.10213	4.35638	-0.0478823	0.963088	0.967355
hsa-miR-767-3p	7.92262	11.472	11.0499	9.51762	2.94586	9.06126	0.0276311	0.979162	1.01934
hsa-miR-767-5p	149.044	185.899	194.565	203.571	170.228	202.833	-0.562702	0.0699056	0.677033
hsa-miR-769-3p	68.085	81.347	70.6328	34.3692	48.3962	50.534	0.310114	0.329336	1.23981
hsa-miR-769-5p	1132.19	1738.27	1433.46	676.456	913.636	816.908	0.396056	0.186331	1.31591
hsa-miR-7703	0	1.82509	0	0	0	0	4.17634	0.270734	18.0802
hsa-miR-7704	0.742745	4.43237	4.11663	0.528757	0.631255	0	2.429	0.0166292	5.38522
hsa-miR-7705	0.990327	0.260728	0	2.11503	2.52502	0.522765	-2.33533	0.0479644	0.198151
hsa-miR-7706	236.688	738.38	251.981	278.302	391.588	271.141	-0.126551	0.743587	0.916019
hsa-miR-7845-5p	0.495164	1.30364	0.649995	0	1.68335	0.174255	-0.00840416	1	0.994192
hsa-miR-7846-3p	0	0.260728	0.649995	0	0	0	3.39985	0.422031	10.555
hsa-miR-7851-3p	15.5977	21.1189	13.8666	7.4026	14.098	9.75828	0.274788	0.457672	1.20982
hsa-miR-7854-3p	2.7234	5.21455	0.649995	0.705009	0.841673	0.34851	1.68111	0.0590648	3.20675
hsa-miR-7974	1093.57	885.431	669.061	698.311	1055.88	608.499	-0.207232	0.579903	0.866198
hsa-miR-7975	0	0	0	0	0	1.5683	-4.53859	0.184099	0.0430277
hsa-miR-7976	13.1218	31.0266	30.3331	17.449	10.9418	22.4789	0.0599586	0.88296	1.04244
hsa-miR-7977	57.9341	274.025	152.749	28.7291	45.8712	35.7223	1.60599	9.51128e-05	3.04404
hsa-miR-8072	0	0	0	0.881261	0	0.34851	-4.33137	0.139074	0.049674
hsa-miR-873-3p	361.965	771.753	536.679	304.388	520.575	326.903	0.0661292	0.842792	1.0469
hsa-miR-873-5p	111.412	320.956	347.531	88.1261	90.2694	166.762	0.686398	0.0759725	1.60926
hsa-miR-874-3p	74.027	79.7826	63.6995	27.1428	40.8211	41.2985	0.594905	0.0743755	1.51037
hsa-miR-874-5p	0.495164	1.56437	0	1.76252	0.420837	1.04553	-1.18196	0.337808	0.440752
hsa-miR-876-3p	7.67504	20.3367	13.8666	20.974	19.3585	13.7662	-0.870897	0.0203194	0.546807
hsa-miR-876-5p	6.68471	10.6898	8.6666	5.46382	4.20837	6.79595	0.200906	0.619481	1.14942
hsa-miR-877-3p	29.4622	42.2379	33.3664	20.269	17.0439	34.3282	0.116468	0.741029	1.08408
hsa-miR-877-5p	815.287	1168.32	990.376	868.747	1214.11	634.288	-0.315183	0.344442	0.803749
hsa-miR-885-5p	0.247582	0.260728	0	0	0	0	2.70734	0.605214	6.53116
hsa-miR-887-3p	855.395	686.235	607.312	283.237	590.644	205.272	0.622863	0.135649	1.53993
hsa-miR-887-5p	16.3404	22.1618	24.6998	12.1614	5.26046	12.7206	0.606154	0.129891	1.5222
hsa-miR-889-3p	2.7234	2.868	0.649995	1.23377	0.841673	3.65936	-0.280118	0.794688	0.823524
hsa-miR-891a-5p	0.990327	0	0	0.352505	0	0	1.08295	0.762467	2.11836
hsa-miR-892a	0.247582	0	0	0.528757	0	0	-1.21526	0.812547	0.430695
hsa-miR-9-3p	17.3307	20.8582	42.2497	53.9332	19.3585	45.4806	-1.03206	0.0237359	0.489012
hsa-miR-9-5p	2300.03	2529.32	3042.84	4153.56	3533.97	10498.5	-1.60918	7.98472e-05	0.327784
hsa-miR-92a-1-5p	63.3809	56.3171	70.1994	50.2319	58.7067	67.2625	-0.288974	0.380964	0.818484
hsa-miR-92a-3p	4822.89	6533.31	11936.5	5818.79	4005.52	8099.2	-0.0758399	0.842281	0.94879
hsa-miR-92b-3p	446.638	819.988	1200.97	433.052	371.809	661.298	0.283018	0.437345	1.21674
hsa-miR-92b-5p	206.236	204.671	195.865	104.165	115.52	113.266	0.460413	0.145422	1.37594
hsa-miR-93-3p	75.5125	120.978	69.9828	57.1057	59.9692	62.5576	0.120076	0.706571	1.08679
hsa-miR-93-5p	3165.58	2999.15	3781.89	4134	2987.52	4432.53	-0.632282	0.058632	0.645155
hsa-miR-933	0.990327	3.38946	1.29999	0.352505	1.89376	2.96234	-0.336334	0.711833	0.792051
hsa-miR-935	0	0	2.38331	1.41002	0	0.69702	-0.341266	0.862152	0.789348
hsa-miR-937-3p	25.5009	62.8353	51.9996	15.6865	20.621	24.57	0.726575	0.0322251	1.65471
hsa-miR-937-5p	0.990327	1.56437	5.41662	1.58627	0.631255	2.09106	0.411764	0.636629	1.33031
hsa-miR-939-5p	4.20889	9.64692	8.6666	3.7013	4.6292	2.43957	0.590169	0.208526	1.50542
hsa-miR-940	26.4913	57.0993	58.2829	10.9276	18.3064	10.9781	1.34817	0.000172292	2.54588
hsa-miR-941	1933.61	2293.36	2207.6	1806.41	2191.09	2145.6	-0.353956	0.241645	0.782436
hsa-miR-942-3p	5.4468	9.38619	9.53326	6.87384	14.5189	12.3721	-0.901726	0.0203065	0.535246
hsa-miR-942-5p	47.0405	41.4557	37.0497	35.0742	33.4565	46.5261	-0.264963	0.460263	0.83222
hsa-miR-943	3.96131	12.7756	6.28328	1.93877	3.15627	4.70489	0.740384	0.133524	1.67062
hsa-miR-95-3p	2.22824	2.08582	2.16665	1.41002	2.52502	3.13659	-0.523597	0.438344	0.695635
hsa-miR-96-5p	637.771	321.998	395.414	487.161	393.693	356.7	-0.220915	0.585209	0.858021
hsa-miR-98-3p	7.42745	4.43237	3.89997	2.64378	3.36669	4.87914	0.169876	0.751806	1.12496
hsa-miR-98-5p	306.506	453.927	383.497	417.894	301.319	396.605	-0.42075	0.183907	0.747036
hsa-miR-9899	0	0	1.94998	0	0	0	4.44011	0.178911	21.7073
hsa-miR-9901	2.7234	3.12873	7.36661	4.0538	5.26046	3.4851	-0.379121	0.44592	0.768906
hsa-miR-9903	3.46615	8.60401	11.2666	20.4453	15.1501	21.4334	-1.76702	1.15005e-05	0.293815
hsa-miR-9983-3p	0	0	0.86666	0.176252	0	0	1.43642	0.801846	2.70648
hsa-miR-9985	10.8936	32.8517	30.3331	9.34137	8.83757	14.9859	0.663218	0.0945323	1.58361
hsa-miR-99a-3p	4.45647	3.65019	3.6833	2.82004	1.05209	2.78808	0.388543	0.508091	1.30907
hsa-miR-99a-5p	5875.86	6195.93	8855.96	5765.39	4915.37	6792.99	-0.165945	0.613948	0.891344
hsa-miR-99b-3p	1068.32	2018.81	1558.9	906.465	1309.85	1130.57	0.0131792	0.965864	1.00918
hsa-miR-99b-5p	9064.96	13631.4	9796.07	7843.05	8602.11	9360.46	-0.109178	0.72051	0.927116

## Sheet: Up
	RSL3+IFNγ-1	RSL3+IFNγ-2	RSL3+IFNγ-3	RSL3-1	RSL3-2	RSL3-3	log2FC	PValue	FC
hsa-miR-22-3p	4109.36	6989.32	5690.92	1548.9	1901.76	1953.75	1.18232	9.63836e-05	2.26942
hsa-miR-210-3p	3566.91	5966.49	3573.02	824.156	1165.09	1057.38	1.66085	2.83393e-07	3.16202
hsa-miR-21-3p	2681.81	3716.93	3641.92	941.011	1342.26	1318.59	1.0481	0.000627002	2.06781
hsa-miR-378c	1676.62	4542.92	3061.91	549.731	1108.69	892.012	1.38332	0.000103829	2.60868
hsa-miR-345-5p	1467.91	2737.12	2523.06	629.044	863.136	681.86	1.16479	0.000195698	2.242
hsa-miR-1180-3p	1246.82	2427.89	1455.34	460.547	628.309	637.425	1.1125	0.000444226	2.1622
hsa-miR-1260b	839.797	3835.04	2171.2	519.592	740.462	551.866	1.38413	0.000480629	2.61015
hsa-miR-149-5p	769.484	1248.62	893.743	271.252	386.749	338.926	1.10237	0.000386401	2.14707
hsa-miR-1260a	646.436	3022.09	1649.04	428.469	596.325	448.01	1.31593	0.000995225	2.48963
hsa-miR-1246	644.455	1749.74	1778.39	144.351	171.491	297.453	2.28418	4.91495e-09	4.87086
hsa-miR-378d	496.154	1806.32	1499.54	207.978	451.347	343.282	1.42331	0.000363145	2.68201
hsa-miR-328-3p	184.944	317.566	206.698	36.308	40.4003	60.815	1.92012	1.05065e-08	3.78455
hsa-miR-320c	162.909	309.744	289.031	60.9833	101.842	80.3316	1.18861	0.0002479	2.27933
hsa-miR-10401-3p	142.607	376.751	327.597	74.3785	142.453	84.5137	1.00539	0.00570549	2.00749
hsa-miR-151a-5p	94.0811	390.048	187.415	45.4731	54.2879	101.416	1.22595	0.00350855	2.3391
hsa-miR-122-5p	81.702	265.421	91.6493	27.8479	85.009	28.9263	1.13492	0.017263	2.19606
hsa-miR-4664-3p	70.0657	212.232	164.882	34.8979	54.7088	45.4806	1.2307	0.000546284	2.34681
hsa-miR-320d	68.8277	185.899	146.249	28.0241	54.7088	36.5936	1.26525	0.000458016	2.4037
hsa-miR-1290	58.1817	316.262	356.197	17.6252	23.5668	57.6784	2.37822	1.14554e-05	5.19896
hsa-miR-7977	57.9341	274.025	152.749	28.7291	45.8712	35.7223	1.60599	9.51128e-05	3.04404
hsa-miR-210-5p	55.9535	115.763	55.6829	16.744	13.2564	13.9404	1.88447	3.9227e-07	3.69218
hsa-miR-1268b	52.9825	337.903	330.847	44.2393	97.6341	61.1635	1.30207	0.00819661	2.46583
hsa-miR-147b-3p	50.5067	198.674	96.1992	28.5529	43.767	39.7302	1.1074	0.00408843	2.15457
hsa-miR-1268a	49.5164	319.913	313.514	41.948	91.1111	57.3299	1.31427	0.00772095	2.48676
hsa-miR-5100	47.2881	243.78	126.316	33.3117	40.1899	46.1776	1.26427	0.00225903	2.40205
hsa-miR-296-3p	39.6131	76.1324	76.0494	17.449	24.1981	25.4412	1.05451	0.001671	2.07701
hsa-miR-3679-5p	30.9477	71.9608	47.4496	14.4527	19.7793	18.1225	1.04488	0.00159108	2.06319
hsa-miR-940	26.4913	57.0993	58.2829	10.9276	18.3064	10.9781	1.34817	0.000172292	2.54588
hsa-miR-181c-5p	22.5299	22.944	15.8165	8.81261	6.10213	5.92467	1.12792	0.00473155	2.18543
hsa-miR-6724-5p	21.7872	52.4062	35.5331	12.1614	12.2043	12.1979	1.09486	0.00131074	2.13592
hsa-miR-3177-3p	21.0445	22.6833	26.2165	7.4026	6.31255	9.23552	1.17891	0.000951452	2.26405
hsa-miR-193a-3p	19.559	43.5415	37.2664	5.99258	12.4147	9.06126	1.40757	0.000130109	2.6529
hsa-miR-378e	17.5783	35.9804	29.8998	2.99629	6.10213	8.18999	1.81677	4.18571e-06	3.52293
hsa-miR-151b	13.617	56.0564	21.2332	5.11132	5.89171	11.3266	1.50558	0.00119307	2.8394
hsa-miR-3661	13.3694	25.0298	19.4998	4.23005	6.9438	6.62169	1.24904	0.000538067	2.37684
hsa-miR-3190-3p	13.1218	23.4655	19.2832	3.7013	9.67924	5.75042	1.10963	0.00494251	2.1579
hsa-miR-452-5p	9.65569	7.5611	11.6999	2.46753	3.36669	4.18212	1.13011	0.00951004	2.18876
hsa-miR-1299	9.16053	20.5975	11.0499	2.64378	3.15627	4.00787	1.57554	0.000155179	2.98047
hsa-miR-4707-3p	8.1702	31.2873	20.5832	4.40631	9.88966	4.70489	1.15958	0.011523	2.23393
hsa-miR-1343-3p	7.67504	19.0331	12.1332	2.46753	2.94586	6.62169	1.21031	0.00698994	2.31388
hsa-miR-551a	7.67504	11.9935	4.76663	0.881261	3.57711	2.26532	1.44563	0.00795489	2.72382
hsa-miR-1275	7.42745	34.416	26.6498	4.40631	7.78548	6.79595	1.33814	0.0030775	2.52826
hsa-miR-584-3p	6.68471	13.0364	8.6666	2.46753	2.52502	4.70489	1.07865	0.0140151	2.11205
hsa-miR-6840-3p	4.95164	9.90765	5.19996	1.05751	0.841673	1.5683	2.029	0.000153032	4.08122
hsa-miR-3183	4.95164	4.17164	7.14994	1.41002	2.3146	1.91681	1.12215	0.03353	2.17671
hsa-miR-6807-5p	4.70405	6.25746	2.81664	0.528757	2.10418	0.871275	1.56853	0.0174046	2.96603
hsa-miR-4429	4.70405	9.64692	7.14994	2.11503	2.94586	2.43957	1.05416	0.0188199	2.07651
hsa-miR-378j	4.45647	7.82183	6.71661	0.705009	3.57711	0.871275	1.46574	0.0158097	2.76206
hsa-miR-524-3p	3.96131	11.7327	8.44993	2.82004	2.52502	1.5683	1.29428	0.00789724	2.45254
hsa-miR-1255b-5p	3.96131	7.30037	2.59998	0.528757	0.841673	1.91681	1.59987	0.0154544	3.03116
hsa-miR-3187-5p	3.96131	5.21455	5.19996	1.76252	1.47293	1.74255	1.07218	0.0333203	2.1026
hsa-miR-548b-3p	3.96131	4.95382	8.44993	1.05751	1.89376	3.13659	1.08145	0.0459494	2.11617
hsa-miR-2276-5p	3.71373	3.91091	2.59998	0	1.68335	0.871275	1.63031	0.0410192	3.09579
hsa-miR-6798-3p	3.46615	3.65019	3.6833	0.352505	1.05209	1.74255	1.35788	0.0405377	2.56308
hsa-miR-6753-3p	3.21856	4.17164	4.11663	0	1.05209	0.871275	2.16067	0.00287596	4.47123
hsa-miR-5091	3.21856	9.64692	7.79994	1.76252	2.10418	2.43957	1.21753	0.0132395	2.32548
hsa-miR-6842-3p	2.97098	13.2971	5.84995	0.352505	2.52502	0.871275	2.07114	0.00216476	4.2022
hsa-miR-6834-5p	2.97098	2.60728	4.11663	1.41002	0	0.34851	1.92476	0.0253018	3.79673
hsa-miR-4448	2.7234	9.90765	4.54996	1.05751	1.47293	0.522765	1.97124	0.00220884	3.92105
hsa-miR-4804-5p	2.7234	7.30037	3.89997	0.881261	1.26251	0.522765	1.8858	0.00411196	3.69558
hsa-miR-6735-5p	2.7234	2.868	4.11663	0.352505	0.631255	0.871275	1.93383	0.00566905	3.82068
hsa-miR-144-3p	1.98065	7.30037	1.51665	0.176252	0.420837	1.04553	2.15881	0.0140179	4.46547
hsa-miR-527	1.98065	11.2113	0	0.352505	0.631255	0.522765	2.52441	0.0243924	5.75338
hsa-miR-4510	1.98065	4.17164	4.11663	0.528757	0.210418	1.5683	1.63617	0.0281549	3.10839
hsa-miR-518a-5p	1.98065	11.2113	0	0.352505	0.631255	0.69702	2.37307	0.0325037	5.18044
hsa-miR-4498	1.73307	4.6931	3.03331	0.705009	1.05209	0.34851	1.67049	0.0276073	3.18323
hsa-miR-3181	1.73307	0.260728	0.649995	0	0	0	5.04583	0.0315446	33.0329
hsa-miR-6736-5p	1.48549	0.260728	4.11663	0	0	0.174255	4.19013	0.00629634	18.2539
hsa-miR-6785-5p	1.48549	1.56437	1.73332	0	0	0.34851	3.08537	0.012583	8.48766
hsa-miR-4755-5p	1.48549	2.60728	5.41662	0.528757	0	1.04553	2.04844	0.0213048	4.13658
hsa-miR-6839-5p	1.48549	3.91091	3.6833	0.528757	1.05209	0.34851	1.75208	0.0261129	3.36845
hsa-miR-3620-5p	1.23791	8.34328	7.36661	0.528757	1.26251	0.871275	2.14212	0.00224947	4.4141
hsa-miR-4466	1.23791	4.43237	4.54996	0.881261	0.841673	0.871275	1.45986	0.0325462	2.75082
hsa-miR-6793-5p	1.23791	2.08582	0	0	0	0	5.20471	0.0376351	36.8785
hsa-miR-4695-3p	0.990327	1.56437	1.51665	0	0	0	5.4892	0.00278155	44.9173
hsa-miR-4690-5p	0.990327	1.56437	1.08332	0	0	0	5.32973	0.00468428	40.2169
hsa-miR-302d-3p	0.990327	1.56437	0.649995	0	0	0	5.15108	0.0113595	35.5327
hsa-miR-6771-5p	0.990327	2.08582	0.43333	0	0	0	5.25391	0.0120978	38.1579
hsa-miR-6788-3p	0.990327	3.38946	4.3333	0.705009	0	0.522765	2.2098	0.0165006	4.62613
hsa-miR-6804-5p	0.990327	0.260728	1.08332	0	0	0	4.80265	0.038668	27.9088
hsa-miR-7704	0.742745	4.43237	4.11663	0.528757	0.631255	0	2.429	0.0166292	5.38522
hsa-miR-1236-3p	0.742745	2.60728	1.51665	0.352505	0.210418	0	2.46256	0.0300907	5.51195
hsa-miR-182-3p	0.742745	2.868	3.6833	0.176252	0.841673	0.34851	1.92524	0.0372928	3.798
hsa-miR-4758-3p	0.742745	3.91091	3.03331	0.705009	0.420837	0.34851	1.80084	0.0402519	3.48424
hsa-miR-6800-3p	0.247582	3.12873	3.24997	0	0	0.174255	4.2178	0.00293429	18.6074
hsa-miR-4747-3p	0	2.60728	1.29999	0	0	0	5.29739	0.0228365	39.3254

## Sheet: Down
	RSL3+IFNγ-1	RSL3+IFNγ-2	RSL3+IFNγ-3	RSL3-1	RSL3-2	RSL3-3	log2FC	PValue	FC
hsa-miR-7-5p	18336.4	6150.82	8268.58	39064.6	36141.7	47026.4	-2.19183	5.9996e-06	0.218874
hsa-miR-10a-5p	7240.03	7763.16	6786.6	12086.9	11419.4	11887.3	-1.11619	0.000495468	0.46131
hsa-miR-9-5p	2300.03	2529.32	3042.84	4153.56	3533.97	10498.5	-1.60918	7.98472e-05	0.327784
hsa-miR-20a-5p	1310.45	1085.93	2885.76	4214.02	1718.91	3026.46	-1.21657	0.0067944	0.430306
hsa-miR-340-5p	629.848	448.451	1116.47	1491.8	793.277	1893.46	-1.34214	0.00172413	0.394435
hsa-miR-221-5p	347.357	119.674	177.449	458.256	310.577	302.855	-1.05745	0.025771	0.480481
hsa-miR-19a-3p	240.65	63.6175	112.882	359.907	226.2	245.874	-1.3011	0.0117109	0.405817
hsa-miR-143-3p	228.766	555.089	551.196	913.515	857.454	212.417	-1.09559	0.024138	0.467944
hsa-miR-1-3p	186.429	389.527	265.631	169.907	146.451	1275.2	-1.34481	0.0302334	0.393706
hsa-miR-365a-3p	179.992	108.723	137.582	322.189	191.481	250.927	-1.22244	0.00202405	0.428556
hsa-miR-365b-3p	179.992	108.723	137.582	322.189	191.481	250.927	-1.22244	0.00202488	0.428556
hsa-miR-34c-5p	179.744	203.628	218.832	329.768	312.05	294.84	-1.06821	0.000631569	0.476911
hsa-miR-500a-5p	176.278	95.1655	77.7827	259.091	218.414	180.354	-1.25834	0.00361021	0.418024
hsa-miR-184	153.996	341.292	431.38	11.1039	19.5689	5363.92	-2.95138	0.0295555	0.129284
hsa-miR-199b-5p	147.064	137.403	176.799	421.243	258.604	410.196	-1.66209	2.79765e-06	0.315981
hsa-miR-548o-3p	96.0617	38.0662	110.282	335.056	176.12	284.733	-2.07951	9.60096e-06	0.236595
hsa-miR-548k	81.9496	61.5317	70.6328	117.032	81.4319	128.774	-1.00067	0.00575974	0.499768
hsa-miR-454-3p	69.0753	52.9277	68.8995	152.282	62.2838	116.228	-1.20859	0.00310374	0.432692
hsa-miR-32-5p	53.9728	41.1949	97.9326	159.508	91.1111	131.737	-1.41672	0.00049747	0.374562
hsa-miR-548bc	50.5067	33.8946	64.1328	128.135	126.251	107.864	-1.68421	5.67093e-06	0.311173
hsa-miR-548aq-3p	43.5744	21.1189	53.9496	97.82	65.6505	85.385	-1.4549	0.000541095	0.364781
hsa-miR-548e-3p	39.3655	41.7164	35.7497	65.0371	66.0713	59.5952	-1.12466	0.000664304	0.458609
hsa-miR-3613-5p	33.4235	40.152	87.7493	122.672	66.0713	114.66	-1.37463	0.000836878	0.385652
hsa-miR-301a-3p	33.176	17.7295	24.4831	56.7532	36.4024	32.0629	-1.11337	0.0104648	0.462214
hsa-miR-548am-3p	26.9864	5.47528	22.5332	38.5992	22.9356	54.3676	-1.39013	0.011302	0.38153
hsa-miR-652-5p	18.8162	9.12546	11.0499	60.102	26.9335	34.6768	-2.01895	2.68872e-05	0.246738
hsa-miR-577	17.3307	10.4291	34.2331	44.9443	21.8835	49.6627	-1.32596	0.00457055	0.398884
hsa-miR-9-3p	17.3307	20.8582	42.2497	53.9332	19.3585	45.4806	-1.03206	0.0237359	0.489012
hsa-miR-514a-3p	14.8549	43.02	40.733	58.3395	47.1337	75.6267	-1.37528	0.000234776	0.385477
hsa-miR-3144-3p	13.617	30.2444	22.9665	33.6642	17.0439	53.6706	-1.12168	0.00653362	0.459559
hsa-miR-215-5p	13.1218	21.1189	22.5332	34.0167	43.3462	20.7364	-1.24928	0.000657782	0.420659
hsa-miR-3145-3p	10.646	6.25746	10.6166	22.0315	18.3064	18.6453	-1.49113	0.000199494	0.355735
hsa-miR-548ar-3p	9.90327	4.17164	12.7832	44.9443	11.9938	16.5542	-1.87762	0.00114666	0.272133
hsa-miR-515-5p	9.65569	5.47528	6.28328	17.9777	10.7313	14.2889	-1.39275	0.00200955	0.380837
hsa-miR-3133	9.65569	6.25746	7.79994	10.7514	15.7814	11.6751	-1.06387	0.00862452	0.478348
hsa-miR-548n	9.16053	7.82183	15.3832	19.7403	10.7313	18.9938	-1.04138	0.0130243	0.485862
hsa-miR-502-5p	8.91295	9.12546	3.46664	17.449	13.8876	15.683	-1.54628	0.000473287	0.342391
hsa-miR-1278	6.93229	9.12546	17.3332	17.0965	8.83757	25.4412	-1.06849	0.0191359	0.476816
hsa-miR-548f-3p	6.68471	4.6931	6.06662	22.7365	20.621	18.8195	-2.23603	1.87659e-08	0.21227
hsa-miR-651-5p	6.43713	8.34328	10.1833	20.4453	10.1001	23.6987	-1.5667	0.000166587	0.33758
hsa-miR-548ah-3p	6.18955	2.08582	5.41662	17.9777	13.0459	15.5087	-2.13164	6.92767e-06	0.228198
hsa-miR-498-5p	6.18955	5.47528	7.36661	9.87013	10.1001	13.7662	-1.23317	0.00156921	0.425383
hsa-miR-10399-5p	5.94196	14.34	15.5999	16.5677	21.6731	15.1602	-1.04835	0.00494621	0.483522
hsa-miR-548ay-5p	5.94196	6.51819	4.98329	9.16512	6.73338	11.1523	-1.06256	0.0104506	0.478781
hsa-miR-548p	5.4468	2.08582	5.84995	17.9777	13.0459	15.683	-2.18157	2.41198e-06	0.220435
hsa-miR-590-5p	5.4468	3.65019	3.03331	7.22634	9.46882	7.66722	-1.38876	0.00289649	0.381892
hsa-miR-372-3p	4.95164	3.65019	3.89997	16.2152	13.0459	13.0691	-2.16951	2.84655e-07	0.222286
hsa-miR-548j-3p	4.20889	1.04291	3.03331	9.34137	6.31255	4.70489	-1.65942	0.00455991	0.316566
hsa-miR-3128	3.71373	2.60728	4.3333	6.34508	8.62715	5.57616	-1.34032	0.00319446	0.394933
hsa-miR-9903	3.46615	8.60401	11.2666	20.4453	15.1501	21.4334	-1.76702	1.15005e-05	0.293815
hsa-miR-519a-3p	2.97098	7.03964	4.11663	4.58256	5.68129	10.281	-1.00066	0.0287988	0.499771
hsa-miR-200a-5p	1.48549	4.6931	3.46664	3.87755	8.41673	3.4851	-1.17038	0.0247584	0.444304
hsa-miR-338-5p	1.48549	1.56437	2.81664	3.87755	1.68335	5.92467	-1.39029	0.0256447	0.381488
hsa-miR-7111-5p	1.23791	1.04291	0.649995	3.52505	4.41878	2.26532	-2.19808	0.000907654	0.217927
hsa-miR-5582-3p	1.23791	0.521455	2.38331	2.99629	1.26251	5.0534	-1.54516	0.035468	0.342659
hsa-miR-3935	0.990327	4.6931	2.16665	3.17254	5.68129	4.53063	-1.25316	0.0199493	0.419528
hsa-miR-7705	0.990327	0.260728	0	2.11503	2.52502	0.522765	-2.33533	0.0479644	0.198151
hsa-miR-10392-5p	0.742745	0.521455	0.86666	1.76252	3.78753	1.5683	-2.08478	0.0094838	0.235731
hsa-miR-3170	0.742745	2.34655	0	3.52505	1.68335	3.13659	-1.94947	0.0191654	0.258912
hsa-miR-643	0.742745	2.08582	1.08332	1.23377	3.57711	3.13659	-1.45407	0.0295835	0.36499
hsa-miR-214-3p	0.495164	2.08582	1.08332	3.7013	1.89376	1.5683	-1.47871	0.045571	0.358809
hsa-miR-548w	0.247582	3.38946	1.94998	7.7551	2.73544	3.4851	-1.88278	0.00466543	0.27116
hsa-miR-509-3-5p	0.247582	2.60728	4.11663	5.28757	3.99795	5.57616	-1.5742	0.00669839	0.335828
hsa-miR-223-3p	0.247582	0.260728	0.216665	1.58627	2.3146	0.69702	-2.95222	0.00704419	0.129209
hsa-miR-548ao-3p	0.247582	1.04291	1.29999	1.76252	3.15627	2.26532	-1.87499	0.00843312	0.272629
hsa-miR-133a-5p	0.247582	2.34655	0.216665	4.0538	1.68335	2.09106	-2.04304	0.0160945	0.242652
hsa-miR-5004-3p	0.247582	0.260728	0	1.41002	1.26251	0.34851	-2.85585	0.0358313	0.138135
hsa-miR-1277-5p	0	0	0.43333	3.17254	1.68335	3.83361	-4.41788	7.75383e-06	0.0467827
hsa-miR-508-3p	0	0	0	1.41002	0.420837	1.21979	-5.55401	0.00364046	0.0212851
hsa-miR-509-3p	0	1.04291	0.216665	1.93877	0.631255	2.96234	-2.61579	0.0102225	0.163144
