# Supplementary material for: Nanoparticle delivery of miR-21-3p sensitizes melanoma to anti-PD-1 immunotherapy by promoting ferroptosis
Source: J Immunother Cancer. 2022 Jun 22;10(6):e004381. doi: 10.1136/jitc-2021-004381 (PMC9226924; doi:10.1136/jitc-2021-004381)
Supplement: Supplementary data [file jitc-2021-004381supp003.xlsx]

## Sheet: Sheet2
Cell Line Name	IFNGR1 log2(TPM+1) Expression	IFNGR2 log2(TPM+1) Expression	JAK1 log2(TPM+1) Expression	JAK2 log2(TPM+1) Expression	STAT1 log2(TPM+1) Expression	IRF1 log2(TPM+1) Expression	IFN-γ gsva enrichment score
A2058	4.15137	6.49633	4.18587	1.78241	4.84398	3.34483	0.0704258
UACC62	3.97269	6.35456	4.5472	2.58256	4.86096	2.05658	0.110753
UACC257	4.09001	5.15299	4.79233	2.09085	5.44526	2.52105	0.0618686
A375	3.82883	5.80038	4.49761	1.70487	4.63749	3.36597	0.0648888
HS294T	4.32625	7.04253	4.91743	1.56071	5.48961	3.61471	0.235272
WM793B	5.19889	7.00259	4.92077	2.68032	6.06587	4.32912	0.494041
